# Supplementary material for: Design and rationale of the COVID-19 Critical Care Consortium international, multicentre, observational study
Source: PubMed Central journal article supplement — BMJ Open. 2020 Dec 2;10(12):e041417. doi: 10.1136/bmjopen-2020-041417 (PMC7714653; doi:10.1136/bmjopen-2020-041417), 2020-12-02
Supplement: bmjopen-2020-041417.draft_revisions.pdf [file bmjopen-2020-041417.draft_revisions.pdf]

# BMJ Open

BMJ Open is committed to open peer review. As part of this commitment we make the peer review history of every article we publish publicly available.

When an article is published we post the peer reviewers' comments and the authors' responses online. We also post the versions of the paper that were used during peer review. These are the versions that the peer review comments apply to.

The versions of the paper that follow are the versions that were submitted during the peer review process. They are not the versions of record or the final published versions. They should not be cited or distributed as the published version of this manuscript.

BMJ Open is an open access journal and the full, final, typeset and author-corrected version of record of the manuscript is available on our site with no access controls, subscription charges or pay-per-view fees (<http://bmjopen.bmj.com>).

If you have any questions on BMJ Open's open peer review process please email [info.bmjopen@bmj.com](mailto:info.bmjopen@bmj.com)

# BMJ Open

## Design and rationale of the COVID-19 Critical Care Consortium prospective, international, multicenter, observational study

|                               |                                                                                                                                                                                                                                                                                                                                                                                                                                                                                                                                                                                                                                                                                                                                                                                                                                                                                                                                                                                                                                                                                                             |
|-------------------------------|-------------------------------------------------------------------------------------------------------------------------------------------------------------------------------------------------------------------------------------------------------------------------------------------------------------------------------------------------------------------------------------------------------------------------------------------------------------------------------------------------------------------------------------------------------------------------------------------------------------------------------------------------------------------------------------------------------------------------------------------------------------------------------------------------------------------------------------------------------------------------------------------------------------------------------------------------------------------------------------------------------------------------------------------------------------------------------------------------------------|
| Journal:                      | <i>BMJ Open</i>                                                                                                                                                                                                                                                                                                                                                                                                                                                                                                                                                                                                                                                                                                                                                                                                                                                                                                                                                                                                                                                                                             |
| Manuscript ID                 | bmjopen-2020-041417                                                                                                                                                                                                                                                                                                                                                                                                                                                                                                                                                                                                                                                                                                                                                                                                                                                                                                                                                                                                                                                                                         |
| Article Type:                 | Protocol                                                                                                                                                                                                                                                                                                                                                                                                                                                                                                                                                                                                                                                                                                                                                                                                                                                                                                                                                                                                                                                                                                    |
| Date Submitted by the Author: | 09-Jun-2020                                                                                                                                                                                                                                                                                                                                                                                                                                                                                                                                                                                                                                                                                                                                                                                                                                                                                                                                                                                                                                                                                                 |
| Complete List of Authors:     | Li Bassi, Gianluigi; Prince Charles Hospital, Critical Care Research Group<br>Suen, Jacky; Prince Charles Hospital, Critical Care Research Group<br>Barnett, Adrian; Queensland University of Technology, Institute of Health and Biomedical Innovation<br>Corley, Amanda; University of Queensland<br>Millar, Jonathan ; The University of Edinburgh The Roslin Institute<br>Fanning, Jonathon; Prince Charles Hospital, Critical Care Research Group<br>Lye, India; Prince Charles Hospital, Critical Care Research Group<br>Colombo, Sebastiano; Prince Charles Hospital, Critical Care Research Group<br>Wildi, Karin; Prince Charles Hospital, Critical Care Research Group<br>Livingstone, Samantha; Prince Charles Hospital, Critical Care Research Group<br>Abbate, Gabriella; Prince Charles Hospital, Critical Care Research Group<br>Hinton, Samuel; University of Queensland<br>Liquet, Benoit; University of Queensland<br>Shrapnel, Sally; University of Queensland<br>Dalton, Heidi; Inova Fairfax Medical Campus<br>Fraser, John; The Prince Charles Hospital, Critical Care Research Group |
| Keywords:                     | INTENSIVE & CRITICAL CARE, Respiratory infections < THORACIC MEDICINE, EPIDEMIOLOGY, Public health < INFECTIOUS DISEASES, Epidemiology < INFECTIOUS DISEASES                                                                                                                                                                                                                                                                                                                                                                                                                                                                                                                                                                                                                                                                                                                                                                                                                                                                                                                                                |
|                               |                                                                                                                                                                                                                                                                                                                                                                                                                                                                                                                                                                                                                                                                                                                                                                                                                                                                                                                                                                                                                                                                                                             |

SCHOLARONE™  
Manuscripts

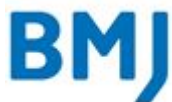

I, the Submitting Author has the right to grant and does grant on behalf of all authors of the Work (as defined in the below author licence), an exclusive licence and/or a non-exclusive licence for contributions from authors who are: i) UK Crown employees; ii) where BMJ has agreed a CC-BY licence shall apply, and/or iii) in accordance with the terms applicable for US Federal Government officers or employees acting as part of their official duties; on a worldwide, perpetual, irrevocable, royalty-free basis to BMJ Publishing Group Ltd ("BMJ") its licensees and where the relevant Journal is co-owned by BMJ to the co-owners of the Journal, to publish the Work in this journal and any other BMJ products and to exploit all rights, as set out in our [licence](#).

The Submitting Author accepts and understands that any supply made under these terms is made by BMJ to the Submitting Author unless you are acting as an employee on behalf of your employer or a postgraduate student of an affiliated institution which is paying any applicable article publishing charge ("APC") for Open Access articles. Where the Submitting Author wishes to make the Work available on an Open Access basis (and intends to pay the relevant APC), the terms of reuse of such Open Access shall be governed by a Creative Commons licence – details of these licences and which [Creative Commons](#) licence will apply to this Work are set out in our licence referred to above.

Other than as permitted in any relevant BMJ Author's Self Archiving Policies, I confirm this Work has not been accepted for publication elsewhere, is not being considered for publication elsewhere and does not duplicate material already published. I confirm all authors consent to publication of this Work and authorise the granting of this licence.

# Design and rationale of the COVID-19 Critical Care Consortium prospective, international, multicenter, observational study

**Short Title:** COVID-19 CCC observational study protocol

Gianluigi Li Bassi MD, PhD<sup>1,2,3,4\*</sup>; Jacky Y. Suen BSc, PhD<sup>1,2\*</sup>; Adrian G. Barnett BSc, PhD<sup>3</sup>; Amanda Corley, RN<sup>1,2</sup>; Jonathan E. Millar MBBS<sup>5,6</sup>; Jonathon P. Fanning BSc, MBBS, PhD, FANZCA<sup>1,2,7</sup>; India Lye, RN<sup>1,2</sup>; Sebastiano Colombo, MD<sup>1,2,8</sup>; Karin Wildi, MD<sup>1,2</sup>; Samantha Livingstone, DVM<sup>1,2</sup>; Gabriella Abbate, RN, MSc<sup>1,2</sup>; Samuel Hinton, PhD<sup>2</sup>; Benoit Liquet, PhD<sup>2,3,9</sup>; Sally Shrapnel MBBS, BMedSc, MSc, PhD, FRACGP<sup>2</sup>; Heidi J. Dalton MD, MCCM<sup>10</sup>; and, John F. Fraser MBChB, PhD, FRCP(Glas), FFARCSI, FRCA, FCICM<sup>1,2,3,7</sup>

On behalf of the COVID-19 Critical Care Consortium Investigators

## Affiliations

1. Critical Care Research Group, The Prince Charles Hospital, Brisbane, Australia
2. University of Queensland, Brisbane, Australia
3. Queensland University of Technology, Brisbane, Australia
4. Institut d'Investigacions Biomèdiques August Pi i Sunyer, Barcelona, Spain
5. Roslin Institute, University of Edinburgh, United Kingdom
6. Queen Elizabeth II University Hospital, Glasgow, United Kingdom
7. UnitingCare Health, Australia
8. Department of Pathophysiology and Transplantation, University of Milan, Italy
9. University of Pau et Pays De L'Adour, LMAP, E2S-UPPA, CNRS, Pau, France
10. INOVA Fairfax Medical Center, Heart and Vascular Institute, Falls Church VA, USA

\* GLB and JS equally contributed to this work

**Corresponding author:**

A/Prof. Gianluigi LiBassi

Critical Care Research Group

The Prince Charles Hospital, Clinical Sciences, Level 3

Rode Road

4032 Chermside, Brisbane, QLD

Australia

Phone: +61 421273217

E-mail: g.libassi@uq.edu.au

**ABSTRACT**

**Introduction:** There is a paucity of data that can be used to guide the management of critically ill patients with coronavirus disease-2019 (COVID-19). In response, a research and data-sharing collaborative – The COVID-19 Critical Care Consortium – has been assembled to harness the cumulative experience of intensive care units (ICUs) worldwide. The resulting observational study provides a platform to rapidly disseminate detailed data and insights crucial to improving outcomes.

**Methods and analysis:** This is an international, multicenter, prospective, observational study of patients with confirmed or suspected SARS-CoV-2 infection admitted to ICUs. This is an evolving, open-ended study that commenced on January 1<sup>st</sup>, 2020 and currently includes more than 350 sites in over 48 countries. The study enrolls patients at the time of ICU admission and follows them to the time of death, hospital discharge, or 28 days post-ICU admission, whichever occurs last. Key data, collected via an electronic case report form devised in collaboration with the ISARIC/SPRINT-SARI networks, include: patient demographic data and risk factors, clinical features, severity of illness and respiratory failure, need for non-invasive and/or mechanical ventilation and/or extracorporeal membrane oxygenation (ECMO), and associated complications, as well as data on adjunctive therapies.

**Ethics and dissemination:** Local principal investigators will ensure that the study adheres to all relevant national regulations, and that the necessary approvals are in place before a site may contribute data. In jurisdictions where a waiver of consent is deemed insufficient, prospective, representative or retrospective consent will be obtained, as appropriate. A web-based dashboard has been developed to provide relevant data and descriptive statistics to international collaborators in real-time. It is anticipated that, following study completion, all de-identified data will be made open access.

**Clinical Trial Registration:** ACTRN12620000421932. Available from: <http://anzctr.org.au/ACTRN12620000421932.aspx>.

## STRENGTHS AND LIMITATIONS

- This protocol is of a pragmatic international, multicenter, observational clinical study of patients with confirmed or suspected SARS-CoV-2 infection admitted to ICUs around the world.
- This is an evolving clinical registry, which will facilitate the characterization of patients and their management and provide real-time information on associated characteristics and outcomes.
- These data will assist clinicians in deriving evidence-based practices for the care of critically ill patients infected by SARS-CoV-2.
- Patients will not receive identical treatments and care. While this will limit some aspects of data analysis, it will also give breadth to the scope of the investigation, as data on laboratory and patient characteristics, interventions and adjunct therapies, and outcomes will be available.
- This study relies on clinicians and support staff to accurately record data during a time of increased patient influx and ICU workload, raising concerns over data input error and completeness.

## INTRODUCTION

The world is currently witnessing a viral pandemic. Cases of atypical pneumonia first emerged in Wuhan, China, in December 2019. [1] Investigation has identified the cause as a novel betacoronavirus, ultimately named severe acute respiratory syndrome coronavirus-2 (SARS-CoV-2). [2] The virus, and the disease it causes – COVID-19 – has since spread internationally. The World Health Organization declared the outbreak a “Public Health Emergency of International Concern” on the 30<sup>th</sup> of January, 2020, and a “pandemic” on the 12<sup>th</sup> of March. There have now been more than 5.4 million confirmed infections globally, resulting in 340,000 deaths (as of the 26<sup>th</sup> of May, 2020). [3]

### **SARS-CoV-2, COVID-19, and critical illness**

The mortality rate of COVID-19 among patients admitted to the intensive care unit (ICU) has been reported to be as high as 60%. [4-7] Early data and clinical experience indicate that this is caused primarily by acute hypoxemic respiratory failure (AHRF). [8-10] These same data have also prompted some authors to suggest that the pathobiology of COVID-19 – associated AHRF may differ from that of Acute Respiratory Distress Syndrome (ARDS). [11,12] This assertion hinges on reports of patients with severe COVID-19 associated AHRF and high pulmonary compliance, a presentation not thought to be typical of ARDS. Much has also been made of the high incidence of thromboembolic events in critically ill patients. [13,14] However, many reports are limited by either small numbers of patients or by geographic restrictions. These fail to account for variations in practices or for the variations between countries in patient, systemic, and organizational factors. Consequently, much of our current practice is driven by anecdotal cases or by limited case series.

### **Rationale for developing a worldwide registry of COVID-19 patients admitted to ICUs**

We aim to improve conclusions robustness regarding the management, interventions and treatment of critically-ill COVID-19 patients around the world. We aim to do this by utilizing



combined data sets which detail a wide variety of patients entering the ICU at multiple stages of COVID-19 illness from diverse geographic locations. This ongoing research effort will aid in developing best practices based on evidence from a wide variety of ICUs throughout the world. This is especially important as there is currently a paucity of evidence-based guidelines and limited clinical resources globally. This data will also aid decision-making of clinicians working in healthcare systems that are currently managing or yet to face a surge in COVID-19 cases.

## METHODS AND ANALYSIS

### Study design

This is an international, multicenter, prospective, observational study. The study protocol v. 1.2.8 appears in [Supplement 1].

### Study eligibility

The inclusion criteria are: (1) clinically suspected or laboratory-confirmed SARS-CoV-2 infection (by real time PCR and/or next generation sequencing), and (2) admission to an ICU. Patients admitted to an ICU for a reason other than SARS-CoV-2 infection are excluded. Patients of all ages from infants through adults can be enrolled into the study.

### Enrolment and participating sites

This study commenced on January 1<sup>st</sup>, 2020. There is no fixed end date for the study. Currently, 350 centers are included, spanning 48 countries [Supplement 2], coordinated by regional leads and assistants [Supplement 3] and the operating team at the coordinating site [Supplement 3]. Co-enrolment with other studies, including interventional trials, is permitted.

### Outcome measures

A summary of variables recorded by the study case report form (CRF) is presented in Table 1.

## Data collection

### *Data collection methods*

Streamlined data-collection instruments and procedures are used to minimize the workload at study centers. Data collection begins at the time of hospital admission using the International Severe Acute Respiratory and Emerging Infection Consortium (ISARIC) and Short Period Incidence Study of Severe Acute Respiratory Illness (SPRINT-SARI) data tools (<https://isaric.tghn.org/COVID-19-CRF/>). Data collection for the COVID-19 CCC observational study commences at the time of a patient's admission to an ICU, using a study specific adaptation of the ISARIC/SPRINT-SARI COVID-19 CRF [Supplement 4]. Figure 1 outlines the schedule of assessments used for patients included in the COVID-19 CCC study. De-identified study data are collected and managed using the REDCap electronic data capture tool hosted at the University of Oxford, United Kingdom. [15] Of note, an optional, interactive augmented data collection has been implemented through a platform developed specifically for the study by Amazon Web Services Australia (AWS, Sydney, Australia). A physical device and associated software tools assist with de-identified data collection and their transfer to the REDCap database. This approach has no impact on the ownership of data, which remains with the individual site. Full encryption is used, beginning from data ingestion into the Amazon cloud, through to transfer to the REDCap web application. Data will not be used for any purpose other than those described in the study protocol. Each site's principal investigator is responsible for ensuring data integrity. Regular written and web-based training is provided. In countries unable to upload data into a centralized database, the ability to retain a local database on a national server is available, with aggregated anonymized data exported centrally for analysis.

### *Inter-hospital transfer*

If a patient is transferred from a facility participating in the COVID-19 CCC and ISARIC/SPRINT-SARI to another participating center, the patient's previously allocated

1  
2  
3 unique identifier transfers with them. However, sites will not have access to study data  
4 collected outside their hospital. It is the responsibility of each hospital to enter data pertaining  
5 to their component of the patient's hospital admission. If a patient is transferred to a non-  
6 participating hospital, there will be no further data collection. All sites will be asked to include  
7 a COVID-19 CCC and ISARIC/SPRINT-SARI study information sheet in any outgoing patient's  
8 documentation.  
9  
10  
11  
12  
13  
14  
15  
16

### 17 *Data management*

18  
19  
20 Several procedures are in place to optimize data quality and completeness. These include:  
21 (1) a detailed data dictionary, (2) quality assurance within the data management system, (3)  
22 quality assurance of key variables within the CRF, and (4) regular written and web-based  
23 training for local study investigators. A compendious CRF is fundamental to the success of  
24 this study. Extensive efforts have been made to limit data collection to essential variables. It  
25 is hoped that this will contribute to more complete data entry with a reduced burden on  
26 participating centers. Information that is not available to the investigator will not be treated as  
27 missing, and no assumptions will be made for missing data. An audit will be conducted on a  
28 randomly selected sample (approximately 5%) of cases. In-person site visits will not be  
29 feasible, given the nature of the study and pandemic. Sub-study projects will be accessed via  
30 the main CRF platform. Specific extensions will be used to collect additional variables, limiting  
31 the overall burden on data collectors, but allowing centers involved in sub-studies to enter data  
32 in the single REDCap format.  
33  
34  
35  
36  
37  
38  
39  
40  
41  
42  
43  
44  
45  
46  
47

### 48 *Data access*

49  
50  
51 The coordinating team will have access to all collected data to assure integrity, provide  
52 oversight, and conduct the main study analyses. Individual sites will have access to all the  
53 data they collect. A multinational steering committee [Supplement 1] oversees registry  
54 operations worldwide and approves investigator-initiated or site-specific sub-studies, external  
55 requests for data, and reviews suggestions by participants. To date, several sub-studies have  
56  
57  
58  
59  
60

1  
2  
3 been initiated focusing on the impact of COVID-19 on the brain, heart, kidneys, management  
4 and risks of ECMO, coagulation and thrombosis risks and long-term effects, all involving multi-  
5 center participation. Once approval is obtained, relevant de-identified data will be made  
6 available. It is anticipated that, following study completion, all de-identified data will be made  
7 open access.  
8  
9  
10  
11  
12

### 13 14 15 **Statistical considerations**

16  
17 Initial characterization will be descriptive, including all eligible patients at participating centers  
18 enrolled within defined timeframes. Where analysis is hypothesis-driven, sample size  
19 calculations and power analysis (where appropriate) will depend on the specific outcome or  
20 endpoint under consideration and will be pre-defined. Results that aim to show an association  
21 or test a hypothesis will include 95% confidence intervals. These intervals and associated  
22 means will be interpreted in terms of their clinical and statistical significance, and discussion  
23 may include whether a comparison is under-powered.  
24  
25  
26  
27  
28  
29  
30  
31  
32

33 For discharge, mortality, and length-of-stay outcomes, we will use a survival analysis with  
34 competing risks approach. [16] We will graphically depict the risks of death and discharge over  
35 time using cumulative incidence plots. We will estimate which patient variables influence the  
36 risk of death and discharge using Cox regression, with separate models for death and  
37 discharge. In addition to Cox models, we will construct non-linear predictive models for both  
38 outcomes using Random Forest models, which will be externally validated on a hold-out test  
39 set. Comparison of the predictive performance of both the Cox regression and Random Forest  
40 modelling approaches will be made using: (1) a Brier score, [17] (2) area under the receiver  
41 operating characteristic (ROC) curves using a 2-sided DeLong test, and (3) calibration plots,  
42 characterized by visual inspection and reporting of slope and intercept. [17] For the Random  
43 Forest models, a Shapley Tree Explainer will be used to identify variables that are highly  
44 predictive of each outcome. [18] This analysis will follow the Transparent Reporting of a  
45  
46  
47  
48  
49  
50  
51  
52  
53  
54  
55  
56  
57  
58  
59  
60

Multivariable Prediction Model for Individual Prognosis or Diagnosis (TRIPOD) reporting guideline for prediction model development and validation. [19]

To show within-patient trends, we will plot continuous longitudinal variables over time using line plots. We will summarize each trend using daily averages and will estimate trends over time and the influence of patient variables using a linear mixed model with a random intercept per patient to control for repeated data. For binary variables, we will use panel bar charts to show the average change over time, and will model these variables using a generalized linear mixed model with a binomial distribution. A smooth estimation using cubic spline will be explored to estimate potential non-linear trends of the continuous longitudinal variables and binary variables.

### **Patient and public involvement in research**

The data collection methodology of this study has been designed without patient or public input due to the urgent need for inclusion of prospective data from critically ill COVID-19. However, a consultative approach is planned via structured interviews, workshops and surveys to develop research questions, refine methods and ensure public voice helps to shape consumer focused outcomes.

## **ETHICS AND DISSEMINATION**

### **Ethical considerations**

Chief investigators and the study management team are responsible for ensuring that the study is conducted in accordance with both the protocol, Declaration of Helsinki and the Principles of Good Clinical Practice. The study management team will continue to work with local principal investigators to ensure that the study adheres to all relevant national regulations, and that the necessary approvals are in place before a site may contribute data. The principal investigator at each site is responsible for maintaining a securely-held enrolment log, linking each patient's hospital record number with the COVID-19 CCC study number, if

1  
2  
3 required. The original protocol and subsequent amendments will be translated into the main  
4 language of the collaborating institutions and submitted for institutional review board approval  
5 or an equivalent. Patients will not be enrolled under the conditions of an amended protocol,  
6 until after approval has been granted.  
7  
8  
9  
10

11  
12 It is expected that this study will not require informed consent in most jurisdictions. This study  
13 is, in effect, a large-scale clinical audit, as all data are collected routinely. This may justify a  
14 waiver of consent. Any jurisdiction that deems informed consent necessary may use forms  
15 provided on our website (<https://www.else.org/COVID19/ECMOCARD.aspx>). Within such  
16 jurisdictions, patients who meet the eligibility criteria will be approached directly. If this is not  
17 possible, due to the patient's incapacity, a model of retrospective or representative consent  
18 may be used, per local requirements.  
19  
20  
21  
22  
23  
24  
25  
26  
27

## 28 **Dissemination**

29  
30  
31 Due to the evolving nature of the pandemic and the uncertainty surrounding its impact, this  
32 study was designed to be responsive to the international call for swift characterization of  
33 COVID-19 patients. Hence, in collaboration with University of Queensland and extramural  
34 collaboration with IBM Australia (St. Leonard's, Australia), a web-based dashboard has been  
35 developed to provide relevant data and descriptive statistics to international collaborators in  
36 real-time.  
37  
38  
39  
40  
41  
42  
43  
44

## 45 **DISCUSSION**

46  
47 Herein we have described the rationale and design of an international, multicenter,  
48 observational registry of COVID-19 patients admitted to an ICU. To date, the characterization  
49 of patients admitted to ICUs with COVID-19 has been limited to national or single-center  
50 series. This study, using a large collaborative network, attempts to overcome the limitations  
51 induced by small patient numbers and geographic restrictions, by providing real-time global  
52 data. In a pandemic of an emerging pathogen, high-quality, real-time information is crucial to  
53 guide an optimal response. The speed of this response and cumulative experience of ICUs  
54  
55  
56  
57  
58  
59  
60

worldwide offer the best framework for determining evidence-based best practices and, therefore, improving outcomes for those requiring critical care.

The design of the COVID-19 CCC study has several strengths. First, the care of patients admitted to the ICU, specifically those who are mechanically ventilated, is dependent on regional resources and may vary. [20,21] This potential heterogeneity is mitigated by the international composition of the consortium. Second, the study leverages novel data acquisition methods, which may improve and expedite data collection. Third, the registry-based, collaborative, and open-source approach of the study lends itself to the conduct of multiple prospective sub-studies. Fourth, the study incorporates the provision of a web-based dashboard, which provides real-time data in an accessible format.

### *Limitations*

Patients will not receive identical treatments and care. While this will limit some aspects of data analysis, it will also give breadth to the scope of the investigation, as data on laboratory and patient characteristics, interventions and adjunct therapies, and outcomes will be available.

This study relies on clinicians and support staff to accurately record data during a time of increased patient influx and ICU workload, raising concerns over data input error and completeness. To overcome this, coordinators at each site have access to regular training, as well as 'drop-in' query sessions on-line.

This study will provide inclusive global characterization of critically ill patients with COVID-19. As the study is open-ended, continued data accrual will result in increased power to answer hypothesis-led questions over time and guide the development of evidence-based patient management tools to improve outcomes.



## REFERENCES

1. Zhu N, Zhang D, Wang W, et al. A Novel Coronavirus from Patients with Pneumonia in China, 2019. *The New England journal of medicine* 2020;382(8):727-33. doi: 10.1056/NEJMoa2001017 [published Online First: 2020/01/25]
2. The species Severe acute respiratory syndrome-related coronavirus: classifying 2019-nCoV and naming it SARS-CoV-2. *Nature microbiology* 2020;5(4):536-44. doi: 10.1038/s41564-020-0695-z [published Online First: 2020/03/04]
3. Dong E, Du H, Gardner L. An interactive web-based dashboard to track COVID-19 in real time. *The Lancet Infectious diseases* 2020;20(5):533-34. doi: 10.1016/s1473-3099(20)30120-1 [published Online First: 2020/02/23]
4. Barrasa H, Rello J, Tejada S, et al. SARS-CoV-2 in Spanish Intensive Care Units: Early experience with 15-day survival in Vitoria. *Anaesthesia, critical care & pain medicine* 2020 doi: 10.1016/j.accpm.2020.04.001 [published Online First: 2020/04/13]
5. Grasselli G, Zangrillo A, Zanella A, et al. Baseline Characteristics and Outcomes of 1591 Patients Infected With SARS-CoV-2 Admitted to ICUs of the Lombardy Region, Italy. *Jama* 2020;323(16):1574-81. doi: 10.1001/jama.2020.5394 [published Online First: 2020/04/07]
6. Bhatraju PK, Ghassemieh BJ, Nichols M, et al. Covid-19 in Critically Ill Patients in the Seattle Region - Case Series. *The New England journal of medicine* 2020 doi: 10.1056/NEJMoa2004500 [published Online First: 2020/04/01]
7. Yang X, Yu Y, Xu J, et al. Clinical course and outcomes of critically ill patients with SARS-CoV-2 pneumonia in Wuhan, China: a single-centered, retrospective, observational study. *The Lancet Respiratory medicine* 2020;8(5):475-81. doi: 10.1016/s2213-2600(20)30079-5 [published Online First: 2020/02/28]
8. Wang D, Hu B, Hu C, et al. Clinical Characteristics of 138 Hospitalized Patients With 2019 Novel Coronavirus-Infected Pneumonia in Wuhan, China. *Jama* 2020;323(11):1061-9. doi: 10.1001/jama.2020.1585 [published Online First: 2020/02/08]
9. Ruan Q, Yang K, Wang W, et al. Clinical predictors of mortality due to COVID-19 based on an analysis of data of 150 patients from Wuhan, China. *Intensive care medicine* 2020;46(5):846-48. doi: 10.1007/s00134-020-05991-x [published Online First: 2020/03/04]
10. Vincent JL, Taccone FS. Understanding pathways to death in patients with COVID-19. *The Lancet Respiratory medicine* 2020;8(5):430-32. doi: 10.1016/s2213-2600(20)30165-x [published Online First: 2020/04/10]
11. Marini JJ, Gattinoni L. Management of COVID-19 Respiratory Distress. *Jama* 2020 doi: 10.1001/jama.2020.6825
12. Gattinoni L, Coppola S, Cressoni M, et al. COVID-19 Does Not Lead to a "Typical" Acute Respiratory Distress Syndrome. *American journal of respiratory and critical care medicine* 2020;201(10):1299-300. doi: 10.1164/rccm.202003-0817LE
13. Klok FA, Kruip M, van der Meer NJM, et al. Incidence of thrombotic complications in critically ill ICU patients with COVID-19. *Thrombosis research* 2020 doi: 10.1016/j.thromres.2020.04.013 [published Online First: 2020/04/16]
14. Levi M, Thachil J, Iba T, et al. Coagulation abnormalities and thrombosis in patients with COVID-19. *The Lancet Haematology* 2020 doi: 10.1016/s2352-3026(20)30145-9 [published Online First: 2020/05/15]
15. Harris PA, Taylor R, Thielke R, et al. Research electronic data capture (REDCap)--a metadata-driven methodology and workflow process for providing translational research informatics support. *Journal of biomedical informatics* 2009;42(2):377-81. doi: 10.1016/j.jbi.2008.08.010 [published Online First: 2008/10/22]
16. Wolke M, Cooper BS, Bonten MJ, et al. Interpreting and comparing risks in the presence of competing events. *BMJ (Clinical research ed)* 2014;349:g5060. doi: 10.1136/bmj.g5060 [published Online First: 2014/08/26]



17. Steyerberg EW, Vickers AJ, Cook NR, et al. Assessing the performance of prediction models: a framework for traditional and novel measures. *Epidemiology (Cambridge, Mass)* 2010;21(1):128-38. doi: 10.1097/EDE.0b013e3181c30fb2 [published Online First: 2009/12/17]
18. Lundberg SM, Erion G, Chen H, et al. From local explanations to global understanding with explainable AI for trees. *Nature Machine Intelligence* 2020;2(1):56-67. doi: 10.1038/s42256-019-0138-9
19. Moons KG, Altman DG, Reitsma JB, et al. Transparent Reporting of a multivariable prediction model for Individual Prognosis or Diagnosis (TRIPOD): explanation and elaboration. *Annals of internal medicine* 2015;162(1):W1-73. doi: 10.7326/m14-0698 [published Online First: 2015/01/07]
20. Bellani G, Laffey JG, Pham T, et al. Epidemiology, Patterns of Care, and Mortality for Patients With Acute Respiratory Distress Syndrome in Intensive Care Units in 50 Countries. *Jama* 2016;315(8):788-800. doi: 10.1001/jama.2016.0291 [published Online First: 2016/02/24]
21. Rhodes A, Ferdinande P, Flaatten H, et al. The variability of critical care bed numbers in Europe. *Intensive care medicine* 2012;38(10):1647-53. doi: 10.1007/s00134-012-2627-8

**Authors' contributions**

GL, JS and JF conceived study. GL, JS, JF, AB, BL, SS and HD designed study. GL, JS, AC, IL, JF will coordinate study. Statistical analysis will be performed by AB, BL, SH and SS. JF, JM, SC, KW, SL, GA prepared the manuscript. All authors provided edits and critiqued manuscript for intellectual content.

**Funding statement**

This work is supported by: the Common Good, an initiative of the Prince Charles Hospital Foundation; and, Wesley Medical Research, UnitingCare Health.

**Competing interests statement**

None declared

**Word count**

2,305

**TABLES AND FIGURES**

**Figure 1. Schematic study overview**

The study ends at death, hospital discharge/transfer, or 28 days, whichever occurs latest.

For peer review only

|                      | Screening | ICU<br>Admission | Start<br>MV | Start<br>ECMO | Daily | Outcomes |
|----------------------|-----------|------------------|-------------|---------------|-------|----------|
| Eligibility criteria | x         |                  |             |               |       |          |
| Demographics         |           | x                |             |               |       |          |
| Co-morbidities       |           | x                |             |               |       |          |
| Severity scoring     |           | x                |             |               |       |          |
| Symptoms             |           | x                |             |               |       |          |
| ABG and biochemistry |           | x                | x           | x             | x     |          |
| Respiratory support  |           |                  | x           | x             | x     |          |
| Adjunctive therapies |           |                  | x           | x             | x     |          |
| ECMO parameters      |           |                  |             | x             | x     |          |
| Pulmonary mechanics  |           |                  |             | x             | x     |          |
| Microbiology         |           |                  |             |               | x     |          |
| Blood transfusion    |           |                  |             |               | x     |          |
| Length of stay       |           |                  |             |               |       | x        |
| Survival             |           |                  |             |               |       | x        |

**Table 1. Assessment schedule**

MV – mechanical ventilation; ECMO – extracorporeal membrane oxygenation; ABG – arterial blood gas.

1  
2  
3  
4  
5  
6  
7  
8  
9  
10  
11  
12  
13  
14  
15  
16  
17  
18  
19  
20  
21  
22  
23  
24  
25  
26  
27  
28  
29  
30  
31  
32  
33  
34  
35  
36  
37  
38  
39  
40  
41  
42  
43  
44  
45  
46  
47  
48  
49  
50  
51  
52  
53  
54  
55  
56  
57  
58  
59  
60

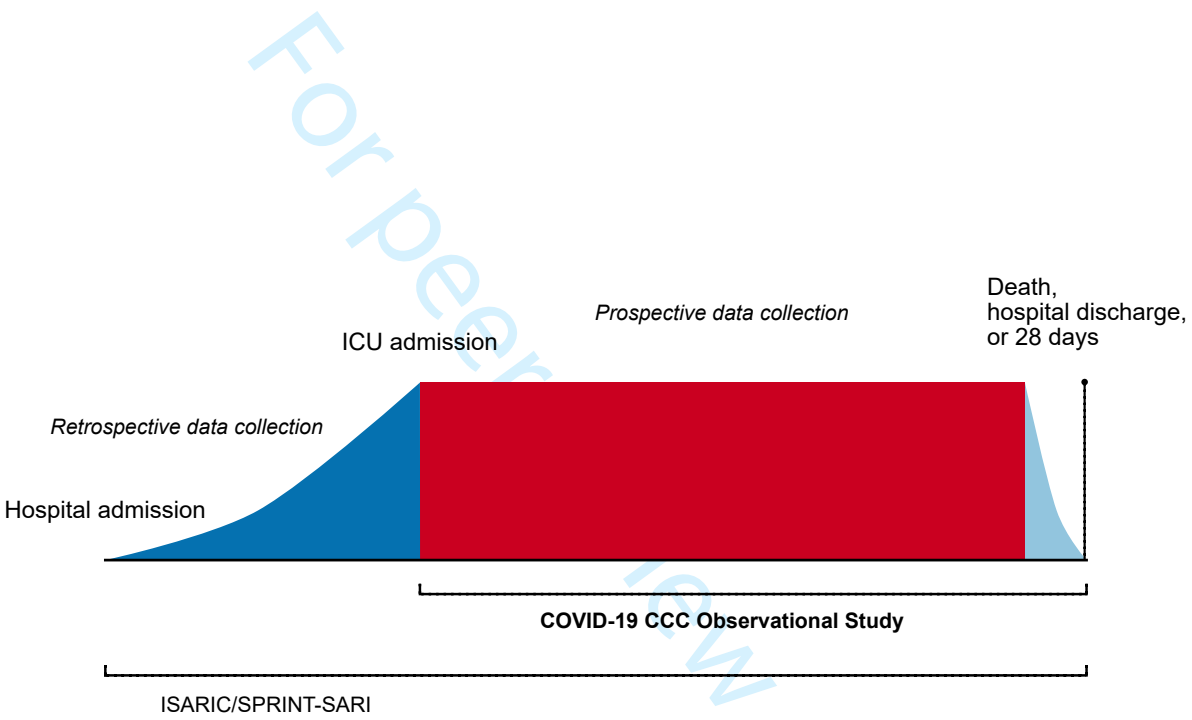

1  
2  
3 **The COVID-19 Critical Care Consortium observational study:**  
4 **Design and rationale of a prospective, international, multicenter,**  
5 **observational study**  
6  
7  
8  
9

10  
11  
12  
13  
14  
15 **SUPPLEMENTAL FILES**  
16  
17  
18  
19  
20  
21  
22  
23  
24  
25  
26  
27  
28  
29  
30  
31  
32  
33  
34  
35  
36  
37  
38  
39  
40  
41  
42  
43  
44  
45  
46  
47  
48  
49  
50  
51  
52  
53  
54  
55  
56  
57  
58  
59  
60

For peer review only

1  
2  
3  
4  
5  
6  
7  
8  
9  
10  
11  
12  
13  
14  
15  
16  
17  
18  
19  
20  
21  
22  
23  
24  
25  
26  
27  
28  
29  
30  
31  
32  
33  
34  
35  
36  
37  
38  
39  
40  
41  
42  
43  
44  
45  
46  
47  
48  
49  
50  
51  
52  
53  
54  
55  
56  
57  
58  
59  
60

For peer review only

# **SUPPLEMENT 1**

# **STUDY PROTOCOL**

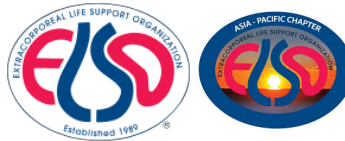

# Covid-19 Critical Care Consortium Observational Study

*Incorporating the  
ExtraCorporeal Membrane Oxygenation for 2019 novel Coronavirus  
Acute Respiratory Disease*

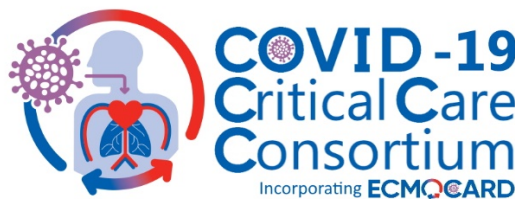

**v. 1.2.8**

**Chief Investigators:**

|                                                                                                                                                                                                                                                                                                                                                                                                                                                                                                                                                                                                                                           |                                                                                                                                                                                                                                                                                                                                                                                                                                                                                                                                                                                                                                                                        |
|-------------------------------------------------------------------------------------------------------------------------------------------------------------------------------------------------------------------------------------------------------------------------------------------------------------------------------------------------------------------------------------------------------------------------------------------------------------------------------------------------------------------------------------------------------------------------------------------------------------------------------------------|------------------------------------------------------------------------------------------------------------------------------------------------------------------------------------------------------------------------------------------------------------------------------------------------------------------------------------------------------------------------------------------------------------------------------------------------------------------------------------------------------------------------------------------------------------------------------------------------------------------------------------------------------------------------|
| <p><b>A/Prof Gianluigi LI BASSI</b><br/>University of Queensland<br/>Level 3   Clinical Sciences Building<br/>Chermside Qld 4032<br/>Australia<br/>T:+61 7 3139 6880<br/>Mobile: +61 0421273217<br/>Email: <a href="mailto:g.libassi@uq.edu.au">g.libassi@uq.edu.au</a></p> <p><b>Dr. Jacky SUEN</b><br/>University of Queensland<br/>Level 3   Clinical Sciences Building<br/>Chermside Qld 4032<br/>Australia<br/>T:+61 7 3139 6880<br/>Mobile: +61 400128961<br/>Email: <a href="mailto:j.suen1@uq.edu.au">j.suen1@uq.edu.au</a></p> <p><b>Prof. John Fraser</b><br/>President Elect Asian-Pacific Extracorporeal Life<br/>Support</p> | <p><b>Prof Heidi Dalton</b><br/>Inova Fairfax Hospital<br/>3300 Gallows Rd Pediatrics<br/>Falls Church, VA 22042-3307<br/>United States<br/>T:+1 703-776-6041<br/>Email: <a href="mailto:heidi.dalton26@gmail.com">heidi.dalton26@gmail.com</a></p> <p><b>Prof Adrian BARNETT</b><br/>Queensland University of Technology<br/>Faculty of Health,<br/>School - Public Health and Social Work,<br/>Research - Public Health<br/>T: +61 7 3138 6010<br/>Email: <a href="mailto:a.barnett@qut.edu.au">a.barnett@qut.edu.au</a></p> <p><b>Dr Sally SHRAPNEL</b><br/>University of Queensland<br/>School of Mathematics and Physics<br/>Faculty of Science<br/>Australia</p> |
|-------------------------------------------------------------------------------------------------------------------------------------------------------------------------------------------------------------------------------------------------------------------------------------------------------------------------------------------------------------------------------------------------------------------------------------------------------------------------------------------------------------------------------------------------------------------------------------------------------------------------------------------|------------------------------------------------------------------------------------------------------------------------------------------------------------------------------------------------------------------------------------------------------------------------------------------------------------------------------------------------------------------------------------------------------------------------------------------------------------------------------------------------------------------------------------------------------------------------------------------------------------------------------------------------------------------------|



|                                                                                                             |                                                                                                     |
|-------------------------------------------------------------------------------------------------------------|-----------------------------------------------------------------------------------------------------|
| <p>University of Queensland<br/>Level 3   Clinical Sciences Building<br/>Chermside Qld 4032 – Australia</p> | <p>T: +61 7 336 56931<br/>Email: <a href="mailto:s.shrapnel@uq.edu.au">s.shrapnel@uq.edu.au</a></p> |
|-------------------------------------------------------------------------------------------------------------|-----------------------------------------------------------------------------------------------------|

### ECMOCARD Research Coordinator:

**Amanda Corley**

Critical Care Research Group  
Level 3 | Clinical Sciences Building  
The Prince Charles Hospital  
Chermside Qld 4032  
Australia

Email: [Amanda.Corley@health.qld.gov.au](mailto:Amanda.Corley@health.qld.gov.au)

**criticalcare**  
RESEARCH GROUP

### ECMOCARD Project Officer:

**Gaenor Cross**

Critical Care Research Group  
Level 3 | Clinical Sciences Building  
The Prince Charles Hospital  
Chermside Qld 4032  
Australia

Email: [Gaenor.Cross@health.qld.gov.au](mailto:Gaenor.Cross@health.qld.gov.au)

### ECMOCARD Coordinating Centres:

Extracorporeal Life Support Organisation And Asia-Pacific Life Support Organisation

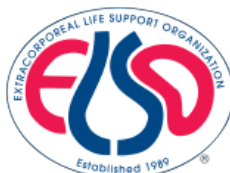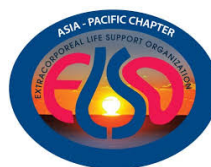

Critical Care Research Group  
Level 3 | Clinical Sciences Building

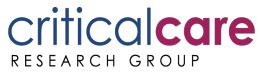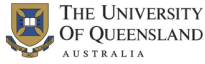

CONFIDENTIAL

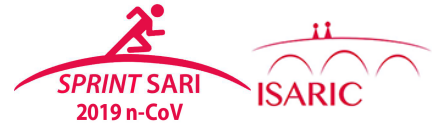

The Prince Charles Hospital

Chermside Qld 4032

Australia

Email: [fraserjohn001@gmail.com](mailto:fraserjohn001@gmail.com)

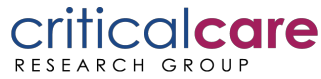

For peer review only

1  
2  
3  
4  
5  
6  
7  
8  
9  
10  
11  
12  
13  
14  
15  
16  
17  
18  
19  
20  
21  
22  
23  
24  
25  
26  
27  
28  
29  
30  
31  
32  
33  
34  
35  
36  
37  
38  
39  
40  
41  
42  
43  
44  
45  
46  
47  
48  
49  
50  
51  
52  
53  
54  
55  
56  
57  
58  
59  
60

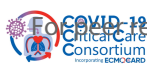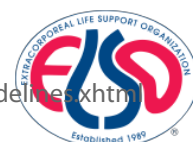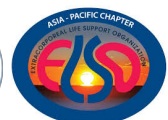

## COVID-19 Critical Care Consortium Steering Committee

### President:

**Robert H Bartlett**, Department of Surgery, University of Michigan, Ann Arbor, MI, USA.

### Committee:

1. **Daniel Brodie**, Department of Medicine, Columbia University College of Physicians and Surgeons, and Center for Acute Respiratory Failure, New York-Presbyterian Hospital, New York, NY, USA
2. **Davide Chiumello**, San Paolo Hospital and University of Milan, Milan, Italy
3. **Heidi J Dalton**, INOVA Fairfax Hospital, Falls Church, Virginia, USA
4. **Eddy Fan**, Interdepartmental Division of Critical Care Medicine, University of Toronto, Toronto, Canada.
5. **John F Fraser**, Critical Care Research Group, The University of Queensland and The Prince Charles Hospital, Chermside, Australia
6. **Alyaa Elhazmi**, King Faisal Specialist Hospital and Research Centre, Riyadh, Saudi Arabia
7. **Carol L Hodgson**, Australian and New Zealand Intensive Care Research Centre/ The Alfred Hospital/Monash University, Melbourne, Australia.
8. **Huynh Trung Trieu**, Hospital for Tropical Diseases, Ho Chi Minh City, Vietnam
9. **Shingo Ichiba**, Department of Surgical Intensive Care Medicine, Nippon Medical School Hospital.
10. **John G Laffey**, Regenerative Medicine Institute (REMEDI) at CÚRAM Centre for Research in Medical Devices, Biomedical Sciences Building, National University of Ireland Galway, Galway, Ireland; Department of Anaesthesia and Intensive Care Medicine, Galway University Hospitals, and School of Medicine, Clinical Sciences Institute, National University of Ireland, Galway, Ireland
11. **Gianluigi Li Bassi**, Critical Care Research Group, The University of Queensland and The Prince Charles Hospital, Chermside, Australia
12. **Carlos Luna**, Department of Medicine, Pulmonary Diseases Division, Hospital de Clínicas, Universidad de Buenos Aires, Buenos Aires, Argentina.
13. **Srinivas Murthy**, BC Children's Hospital, Department of Pediatrics, University of British Columbia, Vancouver, Canada.

- 1  
2  
3  
4  
5  
6  
7  
8  
9  
10  
11  
12  
13  
14  
15  
16  
17  
18  
19  
20  
21  
22  
23  
24  
25  
26  
27  
28  
29  
30  
31  
32  
33  
34  
35  
36  
37  
38  
39  
40  
41  
42  
43  
44  
45  
46  
47  
48  
49  
50  
51  
52  
53  
54  
55  
56  
57  
58  
59  
60
14. **Alistair Nichol**, Critical Care Medicine, University College Dublin Clinical Research Centre at St Vincent's University Hospital, Dublin; Australian and New Zealand Intensive Care Research Centre, Monash University and Alfred Hospital Dept of Intensive Care, Melbourne, Australia.
  15. **Mark T Ogino**, Department of Paediatrics, Division of Neonatology, Nemours Alfred I duPont Hospital for Children, Wilmington, DE, USA; Sidney Kimmel Medical College, Thomas Jefferson University, Philadelphia, PA, USA.
  16. **Jacky Y Suen**, Critical Care Research Group, The University of Queensland and The Prince Charles Hospital, Chermside, Australia
  17. **Antoni Torres**, Department of Pulmonology Hospital Clinic, University of Barcelona, IDIBAPS, Barcelona, Spain. CIBERESUCICOVID
  18. **Antonio Pesenti**, Fondazione IRCCS Ca' Granda Ospedale Maggiore, Angelo Bianchi Bonomi Hemophilia and Thrombosis Center, Fondazione Luigi Villa, Milano, Italy
  19. **Pauline Y Ng**, Division of Respiratory and Critical Care Medicine, Department of Medicine, The University of Hong Kong; Adult Intensive Care Unit, Queen Mary Hospital, Hong Kong.

## Summary

|                                 |                                                                                                                                                                                                                                                                                                                                                                                                                                                                                                                                      |
|---------------------------------|--------------------------------------------------------------------------------------------------------------------------------------------------------------------------------------------------------------------------------------------------------------------------------------------------------------------------------------------------------------------------------------------------------------------------------------------------------------------------------------------------------------------------------------|
| <b>Scientific Title</b>         | <b>Covid-19 Critical Care Consortium</b><br><b>Incorporating the</b><br>ExtraCorporeal Membrane Oxygenation for 2019 novel Coronavirus Acute Respiratory Disease (ECMOCARD)                                                                                                                                                                                                                                                                                                                                                          |
| <b>Study Design</b>             | Prospective/Retrospective multi-centre short period incidence observational study of patients in participating hospitals and intensive care units (ICUs) with 2019 novel coronavirus (COVID-19).                                                                                                                                                                                                                                                                                                                                     |
| <b>The Collaborative</b>        | <b>In response to the COVID-19 outbreak and to assist in pandemic planning both locally and globally, a research collaborative has been assembled.</b> The collaborative consists of investigators from the Asia-Pacific extracorporeal life support organization (APELSO) in collaboration with centres within the SPRINT-SARI and ISARIC Network. In Australia, this study will be also complemented through collaboration with the “National registry on the treatment and outcomes of patients requiring ECMO” (EXCEL Registry). |
| <b>Study Aim and Objectives</b> | To describe clinical features; severity of pulmonary dysfunction; incidence of ICU admission and use of mechanical ventilation, coagulatory and thrombotic derangement, and ECMO technical characteristics; duration of ECMO; complications; and survival of patients with COVID-19.                                                                                                                                                                                                                                                 |
| <b>Inclusions/Exclusions</b>    | All patients admitted to ICU with clinical suspicion or lab-confirmed COVID-19 infection by real-time PCR and/or next-generation sequencing will be included. Patients receiving mechanical ventilation or ECMO for other concomitant causes will be excluded.                                                                                                                                                                                                                                                                       |
| <b>Consent</b>                  | Given the negligible risk associated with this study and the timely nature in which the data needs to be collected, a waiver of consent is sought.                                                                                                                                                                                                                                                                                                                                                                                   |
| <b>Study Setting</b>            | International multi-centre study, conducted in all collaborating hospitals/ICU-based research networks in Asia, Australia and New Zealand, Europe.                                                                                                                                                                                                                                                                                                                                                                                   |
| <b>Sample Size</b>              | All patients with confirmed COVID-19 infection admitted to ICUs at the collaborative centres                                                                                                                                                                                                                                                                                                                                                                                                                                         |
| <b>Study Start Date</b>         | From the commencement of COVID-19 global epidemic                                                                                                                                                                                                                                                                                                                                                                                                                                                                                    |
| <b>Study Duration</b>           | Until completion of COVID-19 global epidemic, as judged by the World Health Organization                                                                                                                                                                                                                                                                                                                                                                                                                                             |

|                                         |                                                                                                                                                                                                                                                                                                                                                                                                                                                                                                                                                                                                                                                                                                                                                                                                                                                                                                                                                                                                                                                             |
|-----------------------------------------|-------------------------------------------------------------------------------------------------------------------------------------------------------------------------------------------------------------------------------------------------------------------------------------------------------------------------------------------------------------------------------------------------------------------------------------------------------------------------------------------------------------------------------------------------------------------------------------------------------------------------------------------------------------------------------------------------------------------------------------------------------------------------------------------------------------------------------------------------------------------------------------------------------------------------------------------------------------------------------------------------------------------------------------------------------------|
| <p><b>Data collection processes</b></p> | <p>Patients will be studied from time of ICU admission until hospital discharge or up to 28 days post ICU admission, whichever occurs later. All clinical information will only be recorded if taken as part of routine clinical practice at each site. Only re-identifiable data will be submitted centrally (REDCap hosted at Oxford University for International centres and at Monash University for Australian centres). A specific ECMOCARD Case Report Form (CRF) will be used by participating sites to collect a minimum data set of ICU, mechanical ventilation and ECMO data. Data for ECMOCARD and SPRINT SARI observational study will be concomitantly collected. Data will be recorded into REDcap through standard data collection or interactive augmented human experience via digital interaction by voice or touch monitors or digital transcription of CRF hard copies. In Australia, patients concomitantly included into the EXCEL registry, EXCEL data will be requested to complement ECMOCARD data and reduce daily workload.</p> |
|-----------------------------------------|-------------------------------------------------------------------------------------------------------------------------------------------------------------------------------------------------------------------------------------------------------------------------------------------------------------------------------------------------------------------------------------------------------------------------------------------------------------------------------------------------------------------------------------------------------------------------------------------------------------------------------------------------------------------------------------------------------------------------------------------------------------------------------------------------------------------------------------------------------------------------------------------------------------------------------------------------------------------------------------------------------------------------------------------------------------|

For peer review only

## Table of contents

|                                                                                             |           |
|---------------------------------------------------------------------------------------------|-----------|
| <b>COVID-19 CRITICAL CARE CONSORTIUM STEERING COMMITTEE</b> .....                           | <b>6</b>  |
| <b>SUMMARY</b> .....                                                                        | <b>8</b>  |
| <b>TABLE OF CONTENTS</b> .....                                                              | <b>10</b> |
| <b>INTRODUCTION</b> .....                                                                   | <b>12</b> |
| INTERNATIONAL SEVERE ACUTE RESPIRATORY AND EMERGING INFECTION CONSORTIUM (ISARIC) .....     | 12        |
| SHORT PERIOD INCIDENCE STUDY OF SEVERE ACUTE RESPIRATORY INFECTION (SPRINT-SARI) .....      | 13        |
| CORONAVIRUSES.....                                                                          | 14        |
| 2019 NOVEL CORONAVIRUS (COVID-19) .....                                                     | 14        |
| <b>OBJECTIVES</b> .....                                                                     | <b>18</b> |
| HYPOTHESIS .....                                                                            | 18        |
| AIMS .....                                                                                  | 18        |
| <b>MATERIALS AND METHODS</b> .....                                                          | <b>18</b> |
| STUDY DESIGN .....                                                                          | 18        |
| RESEARCH CENTRES .....                                                                      | 19        |
| STUDY POPULATION .....                                                                      | 19        |
| <i>Inclusion Criteria</i> .....                                                             | 19        |
| <i>Exclusion Criteria</i> .....                                                             | 19        |
| <i>Co-enrolment</i> .....                                                                   | 19        |
| <b>ETHICS</b> .....                                                                         | <b>20</b> |
| GUIDING PRINCIPLES .....                                                                    | 20        |
| COMPLY WITH ALL LOCAL REQUIREMENTS .....                                                    | 20        |
| <b>CONFIDENTIALITY OF PATIENT DATA</b> .....                                                | <b>20</b> |
| RULE OF TRANSFER.....                                                                       | 21        |
| INTERNATIONAL WAIVER OF INFORMED CONSENT .....                                              | 21        |
| INFORMED CONSENT IN AUSTRALIA .....                                                         | 22        |
| <b>DATA COLLECTION</b> .....                                                                | <b>22</b> |
| ISARIC DATA COLLECTION .....                                                                | 22        |
| ECMOCARD DATA COLLECTION.....                                                               | 23        |
| COAGULATION DISORDERS AND THROMBOSIS SUB-STUDY DATA COLLECTION .....                        | 24        |
| SCREENING LOG .....                                                                         | 28        |
| DATA QUALITY.....                                                                           | 28        |
| DATA MANAGEMENT .....                                                                       | 28        |
| MONITORING .....                                                                            | 29        |
| COLLECTED PARAMETERS.....                                                                   | 29        |
| <i>Demographics and Medical History</i> .....                                               | 29        |
| <i>COVID-19 infection</i> .....                                                             | 30        |
| <i>Clinical parameters upon commencement of invasive mechanical ventilation</i> .....       | 30        |
| <i>Daily assessment of clinical parameters during invasive mechanical ventilation</i> ..... | 30        |
| <i>Clinical features before commencement of ECMO</i> .....                                  | 31        |
| <i>ECMO characteristics</i> .....                                                           | 32        |
| <i>ECMO adverse effects</i> .....                                                           | 32        |
| <i>ECMO adverse effects</i> .....                                                           | 33        |
| <i>Daily assessments for Coagulation Disorders and Thrombosis Sub-study</i> .....           | 33        |
| <i>Main outcomes</i> .....                                                                  | 33        |
| <b>DATA ANALYSIS</b> .....                                                                  | <b>34</b> |

1  
2  
3  
4  
5  
6  
7  
8  
9  
10  
11  
12  
13  
14  
15  
16  
17  
18  
19  
20  
21  
22  
23  
24  
25  
26  
27  
28  
29  
30  
31  
32  
33  
34  
35  
36  
37  
38  
39  
40  
41  
42  
43  
44  
45  
46  
47  
48  
49  
50  
51  
52  
53  
54  
55  
56  
57  
58  
59  
60

**REFERENCE LIST .....35**

**REGULATION, ETHICS AND GOVERNANCE.....38**

    CONFLICT OF INTEREST .....38

    DATA COLLECTION AND SITE MONITORING PLAN .....38

*Data Collection* .....38

*Site Monitoring*.....38

*Compensations*.....38

    DATA ACCESS .....39

**FEASIBILITY .....39**

**DISSEMINATION AND PUBLICATION .....39**

    PUBLICATION POLICY.....39

    AUTHORSHIP POLICY .....40

For peer review only



## Introduction

The ExtraCorporeal Membrane Oxygenation for 2019 novel Coronavirus Acute Respiratory Disease (ECMOCARD Trial) will be carried out within the network and web-based case collection forms of the ISARIC consortium's SPRINT-SARI study and in Australian and New Zealand centres, upon conclusion of the epidemics, potentially complemented through the study "A comprehensive national registry on the treatment and outcomes of patients requiring ECMO" (EXCEL Registry).

### International Severe Acute Respiratory and Emerging Infection Consortium (ISARIC)

The International Severe Acute Respiratory and Emerging Infection Consortium (ISARIC) was formed in 2011, in response to global recognition of the unmet need for timely and effective clinical research during outbreaks of emerging infectious disease with epidemic or pandemic potential. ISARIC represents a new paradigm for effective, coordinated, and timely collaborative clinical research during rapidly emerging threats to public health. It is collaboration among clinicians, clinical researchers, epidemiologists, ethicists, statisticians, laboratory-based clinicians, basic scientists, and public health experts. The mission of ISARIC is to develop operational readiness and to co-ordinate the conduct of essential clinical research to characterise and respond to new epidemic or pandemic infectious disease threats, thereby informing and guiding evidence-based optimal management. ISARIC is facilitating the coordination of SPRINT-SARI, which supports ISARIC's goal of improving the effectiveness of clinical researching globally during a pandemic by:

1. Establishing protocols, with standardised definitions and study methods, for conducting time-critical research during outbreaks of emerging infectious diseases;
2. Coordinating a large number of globally diversified hospitals and/or ICU-based networks with pre-existing ethics, administrative, regulatory and logistics in place, sufficient to implement study protocols, especially including regions where this type of clinical research has traditionally not been performed;
3. Identifying and solving barriers to pandemic research, including those identified in SPRINT-SARI;
4. Studying SARI globally, providing evidence on SARI microbiology, treatment and outcome in both resource-rich and resource-poor settings;

5. Allowing ISARIC to evaluate its research capacity and capabilities; and
6. Assisting ISARIC to maintain network stakeholders during inter-pandemic periods.

### Short PeRIod IncideNce sTudy of Severe Acute Respiratory Infection (SPRINT-SARI)

Severe acute respiratory infection (SARI) continues to be of major relevance to public health worldwide. In the last 10 years there have been multiple SARI outbreaks around the world. The 2009 H1N1 pandemic was estimated to result in more than 200,000 respiratory deaths globally<sup>1-3</sup>. The World Health Organization (WHO) defines SARI as an acute respiratory infection of recent onset (within 10 days) requiring hospitalisation, manifested by fever ( $\geq 38^{\circ}\text{C}$ ) or a history of fever and cough<sup>4-6</sup>. There is international consensus that it is important to undertake observational studies of patients with SARI as an essential component of pandemic and epidemic research preparedness.

The primary aim of the SPRINT-SARI study was to establish a research response capability for future epidemics / pandemics through a global SARI observational study. The secondary aim of this study was to describe the clinical epidemiology and microbiology profiles of patients with SARI. The tertiary aim of this study was to assess the Ethics, Administrative, Regulatory and Logistic (EARL) barriers to conducting pandemic research on a global level. SPRINT-SARI was designed as a multi-centre, prospective, short period incidence observational study of patients in participating hospitals and intensive care units (ICUs) with SARI. The study period was planned to occur, in both Northern and Southern hemispheric winters. The study period comprised a 5 to 7-day cohort study in which patients meeting a SARI case-definition, who are newly admitted to the hospitals/ICUs at participating sites, will be included in the study. The study was planned to be conducted in 20 to 40-hospital/ ICU-based research networks globally. All clinical information and sample data were planned to only be recorded if taken as part of the routine clinical practice at each site and only fully anonymised and re-identifiable data will be submitted centrally. The primary outcome of SPRINT-SARI was to test the feasibility of conducting a global study of SARI.

#### Secondary Outcomes:

1. Incidence of SARI
2. Disease severity and risk factors for severe disease due to SARI
3. Case Fatality Proportion of SARI
4. Duration of ICU/hospital stay due to SARI

5. Microbiology of SARI, including variability in testing
6. Treatments received during hospitalization for SARI
7. Evaluate impact on incidence of alternative case-definitions of SARI
8. Evaluate the operational characteristics of this study, including CRF, Completion Guidelines, and entry criteria to provide information by which iterative improvement in study design can be achieved.
9. Explore the feasibility of extrapolation of results obtained at participating sites to population levels

## Coronaviruses

Coronaviruses are a family of enveloped, single-stranded, positive-strand RNA viruses classified within the Nidovirales. Coronaviruses may infect mammals and birds, triggering respiratory, enteric, hepatic, and neurologic diseases<sup>7</sup>. Six coronavirus species are known to cause human disease. The coronaviruses 229E, OC43, NL63, and HKU1 are prevalent worldwide and most commonly cause only marginal respiratory symptoms. Two other strains, the severe acute respiratory syndrome coronavirus (SARS-CoV) and Middle East respiratory syndrome coronavirus (MERS-CoV) have originated from animal to human transmission and have caused more serious, sometimes fatal, respiratory illnesses. In previous years, SARS-CoV<sup>8,9</sup> and MERS-CoV<sup>10,11</sup>, have caused serious respiratory infections, with mortality rates of 10% for SARS-CoV<sup>12</sup> and 37% for MERS-CoV<sup>13</sup>.

## 2019 Novel Coronavirus (COVID-19)

In late December, 2019, in Wuhan, Hubei, China, a new respiratory syndrome emerged with clinical signs resembling viral pneumonia and person-to-person transmission<sup>14</sup>. Prompt diagnostic methods, through deep sequencing analysis from lower respiratory tract samples, corroborated emergence of a novel coronavirus, namely the 2019 novel coronavirus (COVID-19). In particular, Na Zhu and collaborators<sup>15</sup> were able to isolate the virus from bronchoalveolar lavage (BAL) from patients with pneumonia of unknown cause, who were in Wuhan on December 21, 2019 or later, and who had been present at the Huanan Seafood Market. RNA extracted from BAL fluid from the patients was used as a template to clone and sequence a genome using a combination of Illumina sequencing and nanopore sequencing. More than 20,000 viral reads from individual specimens were obtained, and most contigs

matched to the genome from lineage B of the genus betacoronavirus — showing more than 85% identity with a bat SARS-like CoV (bat-SL-CoVZC45, MG772933.1) genome. Virus isolation from the clinical specimens was performed with human airway epithelial cells and Vero E6 and Huh-7 cell lines. 2019-nCoV–infected human airway epithelial cultures were examined with light microscopy and with transmission electron microscopy 6 days after inoculation. Cytopathic effects were observed 96 hours after inoculation on surface layers of human airway epithelial cells and lack of cilium beating was seen with light microscopy (Fig. 1).

**Figure 1**

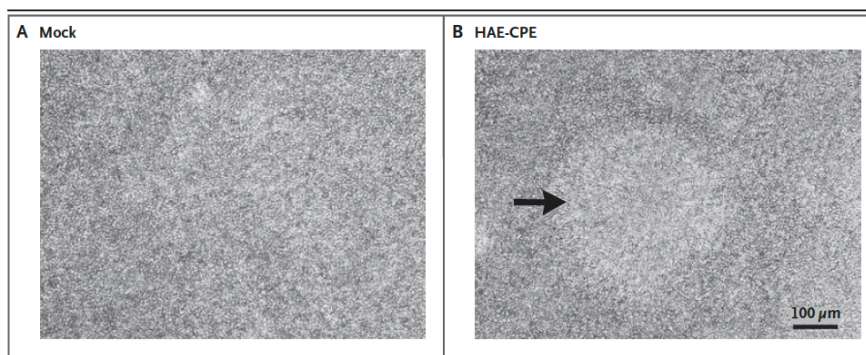

Figure 1: Cytopathic effect of the novel coronavirus, as reported in previous publication<sup>15</sup>

Through transmission electron microscopy, the authors were able to image the COVID-19 particles, that generally appeared spherical, of 60 to 140 nm, with some pleomorphism and distinctive spikes, about 9 to 12 nm (Fig. 3), and gave virions the appearance of a solar corona. This morphology corroborated the Coronaviridae family.

**Figure 2**

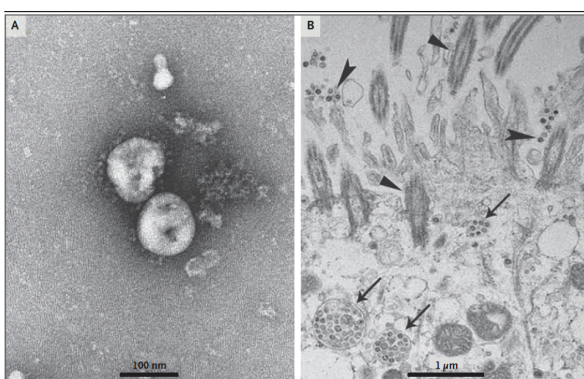

Figure 2: A: COVID-19 particles are depicted. B: COVID-19 in human airway epithelium, as reported in previous publication<sup>15</sup>.



Finally, investigators carried out inclusive phylogenetic analysis that showed that COVID-19 falls into the genus betacoronavirus, which includes coronaviruses as SARS-CoV, bat SARS-like CoV, and others from humans, bats, and other wild animals.

Thus far, more than 111,000 confirmed cases, including health-care workers, have been identified worldwide, and several exported cases have been confirmed in other provinces in China, Thailand<sup>16</sup>, Japan<sup>17</sup>, South Korea<sup>18</sup>, Germany, Italy<sup>19</sup>, France, Iran<sup>20</sup>, USA<sup>21</sup> and many other countries<sup>22</sup>. An early case report in 41 patients with laboratory-confirmed COVID-19 infection in Wuhan has been reported<sup>23</sup>. The median age of the patients was 49 years and mostly men (73%). Among those, 32% were admitted to the ICU because they required high-flow nasal cannula or higher-level oxygen support measures to correct hypoxaemia. Less than half had underlying diseases, including diabetes (20%), hypertension (15%), and cardiovascular diseases (15%). On admission, 98% of the patients had bilateral multiple lobular and subsegmental areas of consolidation (Figure 3)<sup>24</sup>.

**Figure 3**

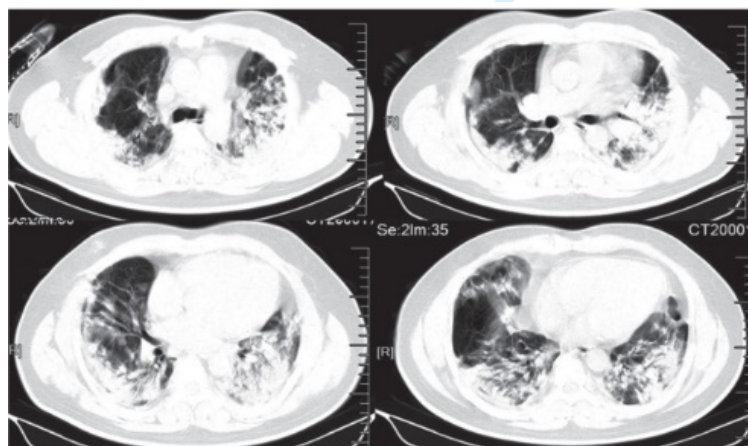

Figure 3 Caption: Transverse chest CT images from a 40-year-old man showing bilateral multiple lobular and subsegmental areas of consolidation on day 15 after symptom onset. Transverse chest CT images from a 53-year-old woman showing bilateral ground-glass opacity and subsegmental areas of consolidation on day 8 after symptom onset, adapted from<sup>23</sup>

Importantly, acute respiratory distress syndrome (ARDS) developed in 29% of the patients, while acute cardiac injury in 12%, and secondary infection in 10%. Invasive mechanical ventilation was required in 10% of those patients, **and two of them (5%) had refractory hypoxaemia and received extracorporeal membrane oxygenation (ECMO).**

1  
2  
3  
4  
5  
6  
7  
8  
9  
10  
11  
12  
13  
14  
15  
16  
17  
18  
19  
20  
21  
22  
23  
24  
25  
26  
27  
28  
29  
30  
31  
32  
33  
34  
35  
36  
37  
38  
39  
40  
41  
42  
43  
44  
45  
46  
47  
48  
49  
50  
51  
52  
53  
54  
55  
56  
57  
58  
59  
60

In a later retrospective report by Wang and collaborators<sup>25</sup>, clinical characteristics of 138 patients with COVID-19 infection were described. Those patients were admitted at Zhongnan Hospital of Wuhan University in Wuhan, China, from January 1 to January 28, 2020. The median age was 56 years and clinical signs of the infection comprised fever (98.6%), fatigue (69.6%), and dry cough (59.4%). Interestingly, lymphopenia occurred in 70.3% of the patients, prolonged prothrombin time 58%, and elevated lactate dehydrogenase 39.9%. ICU admission was required in 26.1% of the patients for acute respiratory distress syndrome (61.1%), arrhythmia (44.4%), and shock (30.6%). Among these patients, 11.1% received high-flow oxygen therapy, 41.7% noninvasive ventilation, and 47.2% invasive ventilation. **ECMO support was needed in 11% of the patients admitted to the ICU.** During the period of follow-up, overall mortality was 4.3%.

## Objectives

### Hypothesis

We hypothesize that a significant percentage of patients with COVID-19 infection will require admission to the intensive care unit, mechanical ventilation and ECMO for refractory hypoxemia, in addition a substantial proportion of patients will present coagulation disorders and thrombosis.

### Aims

This is a multi-centre international study in patients with suspected or confirmed COVID-19 who require admission to the intensive care unit, mechanical ventilation and/or ECMO to characterize the following features:

1. Incidence of ICU admission, use of mechanical ventilation and ECMO
2. Risk factors
3. Clinical features
4. Coagulation disorders and thrombosis
5. Severity of respiratory failure
6. Need for non-invasive and invasive mechanical ventilation and ECMO
7. Settings of invasive mechanical ventilation
8. ECMO technical characteristics
9. Duration of ECMO
10. Complications
11. ICU survival
12. Hospital survival.
13. Requirements and the time frame for approvals in each participating network region

## Materials and Methods

### Study Design

This is an international multi-centre, prospective/retrospective observational study of patients in participating hospitals and ICUs with suspected or confirmed COVID-19 infection. The study will be conducted at 20 to 90 hospital networks globally and will aim to recruit as many patients as possible. The aim is to recruit all eligible patients at each study location and

there is no maximum number of patients that can be recruited from any one site. Patients will be studied from time of ICU admission up to 28 days or until hospital discharge, whichever occurs later. Information will be collected on demographics, co-existing illnesses, severity of illness, source and type of clinical specimens (upper versus lower respiratory tract and collection date), results of microbiological tests. ECMOCARD will specifically focus on collecting data of mechanical ventilation and ECMO and administration of other major therapies (including vasoactive therapies, hypoxaemia rescue therapies, and dialysis), administration of antibiotics and antivirals (and adjunctive therapies, e.g. immunomodulators, corticosteroids) and outcomes at ICU (if applicable), hospital discharge and 28 days.

### Research centres

This is a collaborative effort among investigators of the Asia-Pacific extracorporeal life support organization (APELSO) in collaboration with centres within the SPRINT-SARI and ISARIC Network.

### Study Population

We plan to recruit as many patients as possible of the patients with COVID-19 infection admitted to the ICU, in as many locations as possible, who meet the inclusion criteria with no-exclusion criteria at the participating sites. It is anticipated that each participating Institution could contribute between 5 and 50 patients. Each site's recruitment will be determined by the incidence of the disease during the study period, and their ability to collect the required data.

### Inclusion Criteria

1. Clinical suspicion or laboratory-confirmed COVID-19 infection by real-time PCR and/or next-generation sequencing
2. Admission to an intensive care unit

### Exclusion Criteria

3. Patients treated with mechanical ventilation for other concomitant causes
4. Patients treated with ECMO for other concomitant causes

### Co-enrolment

This is an observational study. Co-enrolment with other studies including interventional clinical trials is accepted.



## Ethics

### Guiding Principles

The Chief Investigators and study management team are responsible for ensuring the study is performed in accordance with the protocol. This study is to be performed in accordance with the ethical principles of the Declaration of Helsinki (June 1964, most recently amended in October 2013), and the most recent, relevant ethical conduct of research guidelines published in the country of the participating site. The Principal Investigator at each site is responsible for maintenance of a securely held enrolment log linking the patient hospital record number and the study number as per their countries research guidelines.

### Comply with all local requirements

National or regional Co-ordinators in their defined location will be responsible for clarifying the requirements for ethics approval. It is the responsibility of the site Chief Investigator and Research Co-ordinator to ensure ethics approval has been granted prior to commencing the study and all local requirements are addressed. Each participating site will require ethics approval for this protocol and data collection of the ECMOCARD and ISARIC SPRINT-SARI CRF (RAPID, CORE, SUPPLEMENTARY TO CORE, DAILY and EPIDEMIOLOGY) and any other study documents relevant to their region. When possible, each participating study site will be supported by the ECMOCARD, Project Officer with their application. The Principal Investigator will produce progress reports, and any other required documentation for the local independent Ethics Committee in accordance with their guidelines. It is the responsibility of the Chief Investigator at each participating hospital to keep an up to date record of all correspondence and applicable documentation with the local Independent Ethics Committee. We will be collecting data on the requirements and the time frame for approvals in each participating network region.

### Confidentiality of patient data

No identifying data will be entered into the central database. Participants' names will not be collected, and confidentiality of information in medical records will be preserved. The confidentiality of the participant will be maintained unless disclosure is to comply with the law. To adhere to international ethical review board requirements and facilitate global ECMOCARD and SPRINT-SARI ISARIC data polling/sharing the CLiRes Data Management

System will convert all dates entered (DD/MM/YYYY) into the eCRF into a re-identifiable format (D1, D2) at a system level. The original entered data (DD/MM/YYYY) will only be accessible by the site Research Co-ordinator and the site Principal Investigator using their unique database account details. ***In Australia, re-identifiable data will be entered into a central REDCap database hosted by Monash University and harmonised with the SPRINT-SARI study.***

### Rule of Transfer

It is proposed that if a patient is transferred from a facility participating in ECMOCARD and SPRINT-SARI to another facility that is also participating, the patient's previously allocated patient ID number will be documented in the CRF completed by the receiving hospital at time of admission. All sites participating in SPRINT-SARI will be asked to include a ECMOCARD and SPRINT-SARI study information sheet in the patients transferring documents, notifying the new hospital of the patient's inclusion in ECMOCARD and SPRINT-SARI, the patients re-identifiable participation number, the contact details of the Principle Investigator of ECMOCARD and SPRINT-SARI in the country and the ECMOCARD and SPRINT-SARI coordinating centre. If you are unsure if a patient has previously been enrolled in ECMOCARD and SPRINT-SARI please check to see if the patients transferring hospital and ward/unit are included in the participating sites list on the ECMOCARD and SPRINT-SARI website ([www.sprintsari.org](http://www.sprintsari.org)). Please use the patients existing ECMOCARD and SPRINT-SARI participant number at the new hospital when entering data into the paper and/or eCRF. Sites will not have access to any data collected outside their hospital; it is the responsibility of each hospital to enter data pertaining to their component of the patient's hospital admission. If a patient is transferred to a non-participating hospital, there will be no further data collection.

### International waiver of informed consent

It is expected that this study will not require individual patient consent. This study is in effect a large-scale clinical audit, as all data is already recorded as part of routine clinical care, therefore justifying participant enrolment using a waiver of consent. Waiver of consent may be available for studies that submit only re-identifiable information and where involvement in the research carries no more than low risk. Any location that deems individual consent necessary can use potential forms reported in the Appendix A. In particular, only in

patients who meet the inclusion/exclusion criteria, informed consent will be obtained directly from the patient, either before the study or retrospectively in case the patient is unconscious at the time of enrolment. If the patient is unable to provide a consent form upon admission, informed consent will be obtained by his/her next of kin.

### Informed Consent in Australia

In Australia all patients admitted to the ICU and meeting all inclusion and no exclusion criteria will be included in ECMOCARD observational study. Their hospital data will be included under a waiver of consent, in line with the National Statement (chapter 2.3) and the NHMRC *Ethical Considerations in Quality Assurance and Evaluation Activities, 2014*.

Data for ECMOCARD and SPRINT SARI observational study will be concomitantly collected. In addition, to minimise workload for site staff, whenever possible, EXCEL data will be requested to complement ECMOCARD data. SPRINT-SARI and EXCEL have both been approved to recruit patients under a waiver of consent. Yet, it is important to emphasize that ethics approval certificate for Project 202/16 has the following special condition: "A waiver of the requirement for consent was granted for the collection and use of identifiable information during relevant epidemics and pandemics. An opt-out approach will be used at all other times."

## Data Collection

### ISARIC Data Collection

As detailed in following paragraphs, we will collect data prospectively or retrospectively on patient demographics including age, sex, height, weight, and ethnicity, as well as the presence of predefined comorbidities. **General data will be collected from each site using the SPRINT-SARI data tool, namely the WHO and ISARIC NOVEL CORONAVIRUS (nCoV) ACUTE RESPIRATORY INFECTION CLINICAL CHARACTERISATION (<https://isaric.tghn.org/novel-coronavirus/>)**. As shown in figure 4, SPRINT-SARI data collection will start upon admission to the Hospital. The CRF was assembled by ISARIC members on the basis of the WHO natural history protocol, INFINITE (ANZICS), MOSAIC and others<sup>5,26</sup>. The CRF was assembled to be a basic CRF with the aims of avoiding data duplication, and with the intention of being user friendly and applicable in all settings, regardless of the resources available<sup>27</sup>. The CRF has previously been used in Singapore, New

Zealand, Saudi Arabia, Vietnam, and North America and adapted by a working group for the purposes of this study with ISARIC approval to all changes made. In 2020, with the emergence of the COVID-19 epidemics, the ISARIC CRF eCRF were modified in order to characterize patients with this infection. In addition, Chief Investigators of the ECMOCARD trial further improved the ISARIC CRF eCRF to specifically describe COVID-19 patients admitted to the ICU and undergoing mechanical ventilation and ECMO.

### ECMOCARD Data Collection

Streamlined data-collection instruments and procedures will be used in an attempt to minimise the work in study centres. Specifically, we will collect data on the timing of ICU admission, endotracheal intubation, mechanical ventilation and ECMO commencement in relation to presumed onset of symptoms and hospital admission. We will investigate whether invasive mechanical ventilation and ECMO treatment was commenced in the participating hospital or whether the patient was retrieved and transferred while receiving invasive mechanical ventilation and/or ECMO from a referral centre. Severity of illness before endotracheal intubation and before ECMO will be investigated by respiratory rate, severity of hypoxemia, hypercapnia, non-pulmonary vital organ support, ventilator settings, and use of rescue ARDS therapies in the 12 hours before ECMO commencement. Dynamics of invasive mechanical ventilation and ECMO treatment will be recorded and characterized from commencement of invasive mechanical ventilation up to discontinuation (Figure 4). We will also collect administration of antiviral and antibiotic medications. Finally, duration of mechanical ventilation, ECMO, ICU and hospital stay, ICU and hospital mortality will be documented. In patients who died during hospital admission, we characterized the mode of death from a list of predefined options. ***Of note, In Australian centres, patients enrolled into the study "A comprehensive national registry on the treatment and outcomes of patients requiring ECMO) (EXCEL Study) will be identified by the ECMOCARD eCRF. Likewise, in the EXCEL study eCRF, a specific question will be added to identify patients enrolled in the ECMOCARD. Thus, we will complement ECMOCARD CRF with data collected through the EXCEL study.***

Figure 4

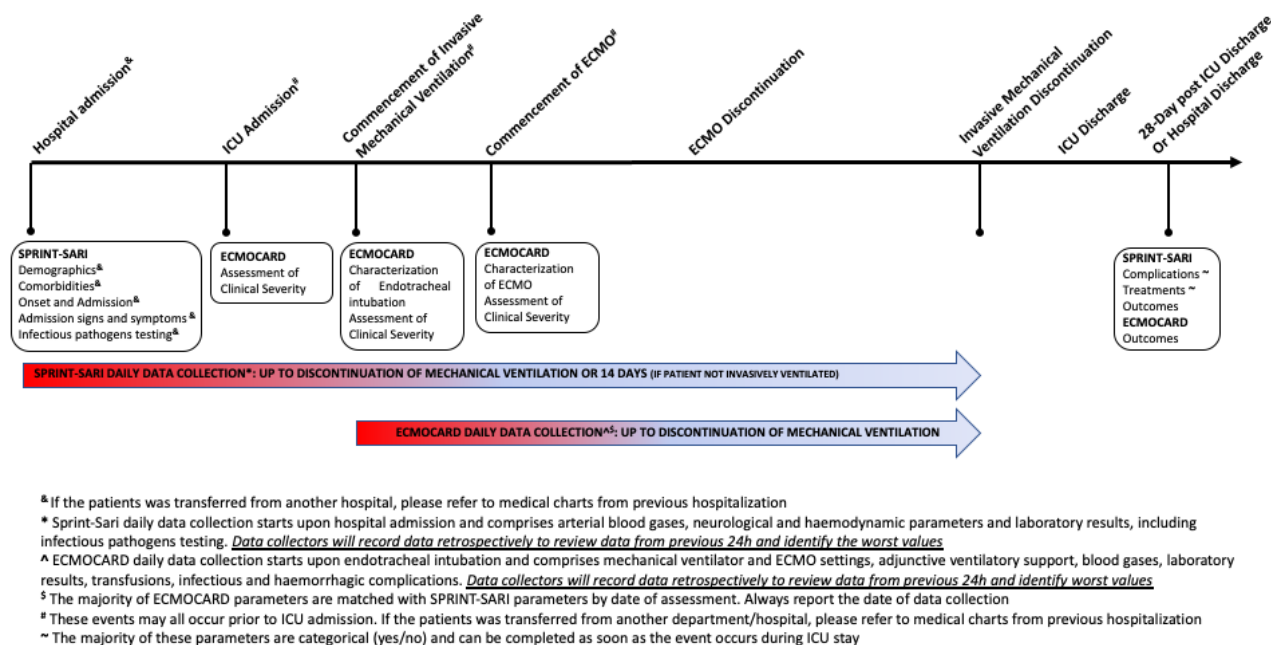

Figure 4 Caption: Follow-up schedule and assessments. ICU, intensive care unit; ECMO, extracorporeal membrane oxygenation.

## Coagulation Disorders and Thrombosis Sub-study Data Collection

In collaborative centres that routinely perform rotational thromboelastometry (ROTEM) or thromboelastography (TEG) in their clinical practice, we will carry out an additional observational sub-study to appraise coagulation disorders and/or pro-thrombotic risks in COVID-19 patients in the ICU. As detailed in following paragraphs, upon admission to ICU, and every 24 hours thereafter, we will collect data prospectively or retrospectively on coagulation disorders and pro-thrombotic risks until discontinuation of mechanical ventilation or in case of patients who are not mechanically ventilated, until 7 days post-ICU discharge. In addition, in centres that routinely use ROTEM, within 1h from a clinically relevant thrombosis/embolism or bleeding event, and 6h prior to commencement of ECMO, we will perform an additional ROTEM assessment to record TRAPTEM AUC, A6 and MS parameters. **Data for the Coagulation Disorders and Thrombosis Sub-study will be collected**



1  
2  
3  
4  
5  
6  
7  
8  
9  
10  
11  
12  
13  
14  
15  
16  
17  
18  
19  
20  
21  
22  
23  
24  
25  
26  
27  
28  
29  
30  
31  
32  
33  
34  
35  
36  
37  
38  
39  
40  
41  
42  
43  
44  
45  
46  
47  
48  
49  
50  
51  
52  
53  
54  
55  
56  
57  
58  
59  
60

*from each collaborating site using the dedicated REDcap CRF, hosted at the University of Queensland.*

### Data collection methods

Each site will have the option to collect data via Option 1 alone **OR** Option 1 +2. The method chosen will be a decision made at a site level. The options for data collection are as follows:

#### OPTION 1: Standard Data Collection

Both the SPRINT-SARI ISARIC and ECMOCARD CRF will be made available at all participating sites as a paper CRF. The SPRINT-SARI ISARIC and ECMOCARD CRFs will be available in a variety of languages and will be translated into languages appropriate for all participating sites. The translation of the paper and electronic CRFs from English into the required language will be the responsibility of the national lead investigators and collaborators of the Critical Care Research group and checked for consistency by an appropriate investigator in the relevant country. All data will be collected by trained staff at each study site and these individuals will enter all required data described in the protocol into the CRFs directly from the source data. Trained staff at sites with the IT capabilities can enter all required data directly into the protected online database, known as the eCRF; paper CRFs are the alternative option for direct data entry with subsequent transcription, upon completion, into the eCRF. Information recorded in the CRF should accurately reflect the participants' medical/hospital notes. The Research Coordinator or Site Investigator will have the ability to choose the process they use to enter data into the eCRF, where data may be entered at one time or intermittently. If used, the original paper based CRF will be stored within a locked office in each study site. The intent of this process is to improve the quality of the clinical study by providing prompt feedback to the Investigators on the progress of the submitted data and to enhance the ability to collect early safety information in a more timely fashion to fully comply with the intent of GCP requirements. ***Data from International countries will be entered into an online eCRF database managed by the Oxford University Clinical Research Unit, Vietnam (OUCRU) for the SPRINT-SARI ISARIC and ECMOCARD tiers. Data from Australia will be entered into an online eCRF database managed by Monash University, and will be complemented with data from SPRINT SARI observational study (ALFRED HREC Reference 202/16) and EXCEL (ALFRED HREC Reference 534/18)).*** In Countries unable to upload data on a centralised database the right to retain a local database on a

national server is available with aggregated completely anonymised data exported centrally for analysis. Each site will be identified via a 3-digit network code, a 3-digit site code, and each patient will be assigned a 4-digit sequential patient code making up the patient ID number at time of originally enrolment in SPRINT- SARI. The site-code will be specified as to whether it is an ICU, hospital ward, or other facility. The site code is obtained by registering on the eCRF, data management system. Patient numbers should be assigned sequentially for each site beginning with 0001. In the case of a single site recruiting patients on different wards, or where it is otherwise difficult to assign sequential numbers, it is acceptable to assign numbers in blocks. Alpha characters can also be used (e.g. Intensive Care Unit will assign A001 onwards, in-patient ward will assign B001 onwards). ***The full patient identification number will therefore be a 10-digit number, with the format of the following: network code - site code – individual patient code [ ][ ][ ]-[ ][ ][ ]-[ ][ ][ ]-[ ][ ][ ](eg. 001-012-0001).*** ***The register of patient names and study numbers will not leave the participating hospital. Access to the data entry system will be protected by username and password.*** Username and password will be assigned during the registration process for individual Research Coordinators or Site Investigators. All electronic data transfer between study site and database will be username and password protected. Each centre will maintain a trial file including a protocol, ethics approval documentation, and paper CRFs. A participant list will be used in each study site to match identifier codes in the database to individual patients in order to record clinical outcomes and supply any missing data points. The Participant List is maintained locally and is not to be transferred to any other location. The Research Coordinator will compile an enrolment log including the patient's name, age, hospital identification number and unique study number. Subsequent data will be identified by the unique study number only. The enrolment log and study data will be kept separately.

## OPTION 2: Interactive augmented data collection

We will use platforms and solutions provided by Amazon to collect data and transfer data into the REDcap web application. Data will be collected through 1) voice commands; 2) digital video monitor interface and 3) through digital transcription of parameters collected via SPRINT-SARI/ECMOCARD paper CRFs. Similar to option 1, only de-identified information will be collected, encrypted and transferred directly to the REDCAP database. No data or

information of any kind will be directed elsewhere. Amazon Web Services will not have any direct interaction with the enhanced user-interface once it is implemented and will only act in an external consultancy capacity. Data will be fully encrypted from data ingestion into Amazon cloud, up to de-encryption into the REDcap web application. Thus Amazon platform will only channel, without being able to codify, data from hospitals into the REDcap system.

### Data collection methods (Coagulation Disorders and Thrombosis sub-study)

As for the Coagulation Disorders and Thrombosis Sub-study, the CRF will be made available at all collaborating sites as a paper CRF. The Coagulation Disorders and Thrombosis Sub-study CRF will be only available in English. Data will be collected by trained staff at each study site and these individuals will enter all required data described in the protocol into the CRFs directly from laboratory results, ROTEM or TEG reports. Trained staff at sites with the IT capabilities can enter all required data directly into the protected online database hosted at UQ, known as the eCRF; paper CRFs are the alternative option for direct data entry with subsequent transcription, upon completion, into the eCRF. Information recorded in the CRF should accurately reflect the participants' laboratory results, ROTEM or TEG reports. The Research Coordinator or Site Investigator will have the ability to choose the process they use to enter data into the eCRF, where data may be entered at one time or intermittently. If used, the original paper based CRF will be stored within a locked office in each study site. The intent of this process is to improve the quality of the clinical study by providing prompt feedback to the Investigators on the progress of the submitted data and to enhance the ability to collect early safety information in a more timely fashion to fully comply with the intent of GCP requirements. **Data will be entered into an online eCRF database managed by the University of Queensland.** In Countries unable to upload data on a centralised database the right to retain a local database on a national server is available with aggregated completely anonymised data exported centrally for analysis. **The full patient SPRINT-SARI/ECMOCARD identification number will be recorded to match results of the Coagulation Disorders and Thrombosis Sub-study with SPRINT-SARI/ECMOCARD records. The register of patient names and study numbers will not leave the participating hospital. Access to the data entry system will be protected by username and password.** Username and password will be assigned by the University of Queensland during the registration process for individual Research Coordinators or Site Investigators. All electronic data transfer between study site and



database will be username and password protected. The Participant List of the Coagulation Disorders and Thrombosis Sub-study is maintained locally and is not to be transferred to any other location.

### Screening log

No screening log will be maintained.

### Data quality

Several procedures to ensure data quality and protocol standardisation will help to minimise bias. These include:

1. Online meetings for all research coordinators will be held to ensure consistency in procedures;
2. A detailed data dictionary will define the data to be collected on the case report form;
3. Quality checks will be built into the data management system and there will be quality checks of critical data points entered into the CRFs to ensure standardization and validity of the data collected;

An achievable data set will be fundamental to the success of the study. We have identified the key data points whilst not discouraging centres from participating through an excessive burden of data collection. Data queries may be generated, depending on resource availability. Any information that is not available for the investigator will not be considered as missing. No assumptions will be made for missing data.

### Data management

Data entry and data management will be coordinated by ISARIC and ECMOCARD steering committee, including programming and data management support. On behalf of the management committee, ANZIC-RC and ISARIC will act as custodian of the data. The University of Queensland will receive data from the data custodians via data sharing agreements. The management committee of the trial will take responsibility for the content and integrity of any data. There will be periodic assessments of data burden to ensure that the infrastructure is organized to handle large amounts of incoming data in small time periods. SPRINT-SARI and ECMOCARD will adhere to the research and data sharing policies of ISARIC, Sample and Data Sharing Policy, Version 4, 21 July 2014. ***Clinical investigators contributing to the research efforts will be given full recognition for their efforts and will be***

**given the opportunity to access data. Ownership of any data transferred to the eCRF will be retained by the site that contributed it.** Networks will retain the right to request raw data for all sites included in their network for research purposes, provided that the research proposal has been reviewed and approved by the management committee, ISARIC and ECMOCARD following publication of the primary manuscript. All analysis of pooled data will be undertaken with the explicit agreement of each site who contributed. ISARIC and ECMOCARD will retain the right to use all pooled data for scientific and other purposes. All members of the study group will have the right to access the pooled data for research purposes provided the research proposal has been reviewed and deemed satisfactory by the management committee following publication of the primary manuscript. Only summary data will be presented publicly. Individual patient data provided by participating sites will remain the property of the respective institution. Of note, a data management plan will be developed to address researchers' intentions related to generation, collection, access, use, analysis, disclosure, storage, retention, disposal, sharing and re-use of data and information, the risks associated with these activities and any strategies for minimising those risks.

## Monitoring

Data monitoring will be conducted on a randomly selected subset (up to 5%) of cases, through discussion with the local site investigator to discuss data collection techniques. Direct site visits will not be feasible, given the scope of the study.

## Collected Parameters

The following parameters will be assessed and recorded based on the follow-up schedule and assessments reported in Figure 4. All the mandatory variables to be assessed are highlighted in red:

### Demographics and Medical History

1. Personal Data
2. Medical History and comorbidities, including type of anti-hypertensive medications
3. Smoking habits
4. Chronic alcohol abuse
5. Intravenous drug abuse
6. Immuno-competency status

## COVID-19 infection

1. Date of first signs of infection
2. Date of hospital admission
3. Date of ICU admission
4. Date of invasive mechanical ventilation
5. Blood gases before commencement of invasive mechanical ventilation
6. Use of continuous renal replacement therapy before commencement of invasive mechanical ventilation
7. Use of vasoactive drugs before commencement of invasive mechanical ventilation
8. Use of cardiac-assist devices before commencement of invasive mechanical ventilation
9. Acute physiology and chronic health evaluation (APACHE II) score upon ICU admission
10. Use of anti-viral treatment
11. Use of antibiotics
12. Cutaneous manifestations

## Clinical parameters upon commencement of invasive mechanical ventilation

1. Date of invasive mechanical ventilation commencement
2. Use of prone position
3. Use of neuromuscular blockade
4. Use of recruitment manoeuvres
5. Use of inhaled nitric oxide
6. Use of bicarbonate
7. Blood gases
8. Ventilatory mode
9. Inspiratory fraction of oxygen
10. Respiratory rate
11. Tidal volume (ml/Kg of ideal body weight)
12. Positive end-expiratory pressure
13. Airway plateau pressure

## Daily assessment of clinical parameters during invasive mechanical ventilation

1. Date of assessment

2. Use of prone position
3. Use of neuromuscular blockade
4. Use of recruitment manoeuvres
5. Use of inhaled nitric oxide
6. Blood gases
7. Ventilatory mode
8. Inspiratory fraction of oxygen
9. Respiratory rate
10. Tidal volume (ml/Kg of ideal body weight)
11. Positive end-expiratory pressure
12. Airway plateau pressure
13. Haemoglobin
14. White blood cells
15. AST
16. ALT
17. Lactate
18. Creatinine
19. Ferritin
20. D-dimer
21. Troponins
22. BNP
23. Use of continuous renal replacement therapy
24. Use of vasoactive drugs
25. Use of anticoagulants
26. Transfused blood products
27. Infectious complications
28. Haemorrhagic complications

#### Clinical features before commencement of ECMO

1. Date of ECMO commencement
2. Use of prone position
3. Use of neuromuscular blockade

4. Use of recruitment manoeuvres
5. Use of inhaled nitric oxide
6. Use of bicarbonate
7. Blood gases
8. Ventilatory mode
9. Inspiratory fraction of oxygen
10. Respiratory rate
11. Tidal volume (ml/Kg of ideal body weight)
12. Positive end-expiratory pressure
13. Airway plateau pressure

#### ECMO characteristics

1. Type and manufacturer of centrifugal blood pump driven circuit
2. Type and manufacturer of low-resistance oxygenator
3. Type of ECMO: venous-venous or venous-arterial
4. Peripheral access: femoral, jugular, both
5. ECMO blood flow rate day 0, and every 24 hours thereafter
6. ECMO gas flow rate day 0, and every 24 hours thereafter
7. Anticoagulation during ECMO
8. Frequency of ECMO circuit change
9. Ventilatory settings on ECMO
10. Vasoactive support on ECMO
11. Organ dysfunctions on ECMO

#### ECMO adverse effects

1. Transfused blood during ECMO
2. Transfused plasma during ECMO
3. Transfused platelets during ECMO
4. Transfused cryoprecipitates during ECMO
5. Type and source of infectious complications
6. Type and source of haemorrhagic complications
7. Other complications

ECMO adverse effects

1. Transfused blood during ECMO
2. Transfused plasma during ECMO
3. Transfused platelets during ECMO
4. Transfused cryoprecipitates during ECMO
5. Type and source of infectious complications
6. Type and source of haemorrhagic complications
7. Other complications

Daily assessments for Coagulation Disorders and Thrombosis Sub-study

1. SPRINT-SARI/ECMOCARD patient number
2. Date of assessment
3. Lactate dehydrogenase
4. Ferritin
5. D-dimer
6. Fibrinogen
7. Activated clotting time
8. Activated partial thromboplastin time
9. International normalised ration
10. Plasma free haemoglobin
11. ROTEM parameters (EXTEM, FIBTEM, INTEM, HEPTTEM, TRAPTEM, NATEM if patients undergoing treatment with low molecular weight heparin and ECATEM if patients undergoing treatment with direct thrombin inhibitors)
12. TEG parameters

Main outcomes

1. Date of ECMO discontinuation
2. Date of invasive mechanical ventilation discontinuation
3. Date of ICU Discharge
4. Date of Hospital Discharge
5. Mortality at 28 days
6. Main cause of death

## Data Analysis

The global analysis of SPRINT-SARI/ECMOCARD and Coagulation Disorders and Thrombosis Sub-study categorical variables will be described as proportions and will be compared using chi-square or Fisher’s exact test. Continuous variables will be described as mean and standard deviation if normally distributed or median and inter-quartile range if not normally distributed. Comparisons of continuous variables will be performed using one-way ANOVA or Mann-Whitney test, as appropriate. A logistic regression model will be performed to assess independent association between prognostic factors and outcomes, taking into account the hierarchical nature of the data. Significance will be set at  $p < 0.05$ .

For peer review only



## Reference List

1. Bolotin S, Pebody R, White PJ, et al. A new sentinel surveillance system for severe influenza in England shows a shift in age distribution of hospitalised cases in the post-pandemic period. *PLoS One*. 2012;7(1). doi:10.1371/journal.pone.0030279
2. Dawood FS, Iuliano AD, Reed C, et al. Estimated global mortality associated with the first 12 months of 2009 pandemic influenza A H1N1 virus circulation: A modelling study. *Lancet Infect Dis*. 2012;12(9):687-695. doi:10.1016/S1473-3099(12)70121-4
3. Simonsen L, Spreeuwenberg P, Lustig R, et al. Global Mortality Estimates for the 2009 Influenza Pandemic from the GLaMOR Project: A Modeling Study. *PLoS Med*. 2013;10(11). doi:10.1371/journal.pmed.1001558
4. Huang QS, Baker M, McArthur C, et al. Implementing hospital-based surveillance for severe acute respiratory infections caused by influenza and other respiratory pathogens in New Zealand. *West Pacific Surveill response J WPSAR*. 2014;5(2):23-30. doi:10.5365/WPSAR.2014.5.1.004
5. Critical Care Services and 2009 H1N1 Influenza in Australia and New Zealand. *N Engl J Med*. 2009;361(20):1925-1934. doi:10.1056/NEJMoa0908481
6. Guery B, Poissy J, El Mansouf L, et al. Clinical features and viral diagnosis of two cases of infection with Middle East Respiratory Syndrome coronavirus: A report of nosocomial transmission. *Lancet*. 2013;381(9885):2265-2272. doi:10.1016/S0140-6736(13)60982-4
7. Weiss SR, Navas-Martin S. Coronavirus Pathogenesis and the Emerging Pathogen Severe Acute Respiratory Syndrome Coronavirus. *Microbiol Mol Biol Rev*. 2005;69(4):635-664. doi:10.1128/mmb.69.4.635-664.2005
8. Drosten C, Günther S, Preiser W, et al. Identification of a Novel Coronavirus in Patients with Severe Acute Respiratory Syndrome. *N Engl J Med*. 2003;348(20):1967-1976. doi:10.1056/NEJMoa030747
9. Ksiazek TG, Erdman D, Goldsmith CS, et al. A Novel Coronavirus Associated with Severe Acute Respiratory Syndrome. *N Engl J Med*. 2003;348(20):1953-1966. doi:10.1056/NEJMoa030781
10. Zaki AM, Van Boheemen S, Bestebroer TM, Osterhaus ADME, Fouchier RAM. Isolation of a novel coronavirus from a man with pneumonia in Saudi Arabia. *N Engl J Med*.



- 2012;367(19):1814-1820. doi:10.1056/NEJMoa1211721
11. de Groot RJ, Baker SC, Baric RS, et al. Middle East Respiratory Syndrome Coronavirus (MERS-CoV): Announcement of the Coronavirus Study Group. *J Virol.* 2013;87(14):7790-7792. doi:10.1128/jvi.01244-13
  12. WHO | Summary of probable SARS cases with onset of illness from 1 November 2002 to 31 July 2003. *WHO.* 2015.
  13. WHO | Middle East respiratory syndrome coronavirus (MERS-CoV). *WHO.* 2020.
  14. Chan JF-W, Yuan S, Kok K-H, et al. A familial cluster of pneumonia associated with the 2019 novel coronavirus indicating person-to-person transmission: a study of a family cluster. *Lancet.* January 2020. doi:10.1016/S0140-6736(20)30154-9
  15. Zhu N, Zhang D, Wang W, et al. A Novel Coronavirus from Patients with Pneumonia in China, 2019. *N Engl J Med.* January 2020:NEJMoa2001017. doi:10.1056/NEJMoa2001017
  16. WHO | Novel Coronavirus – Thailand (ex-China). *WHO.* 2020.
  17. WHO | Novel Coronavirus – Japan (ex-China). *WHO.* 2020.
  18. WHO | Novel Coronavirus – Republic of Korea (ex-China). *WHO.* 2020.
  19. Spina S, Marrazzo F, Migliari M, Stucchi R, Sforza A, Fumagalli R. The response of Milan's Emergency Medical System to the COVID-19 outbreak in Italy. *Lancet (London, England).* 2020;0(0). doi:10.1016/S0140-6736(20)30493-1
  20. Ebrahim SH, Memish ZA. COVID-19: preparing for superspreader potential among Umrah pilgrims to Saudi Arabia. *Lancet.* 2020;0(0). doi:10.1016/S0140-6736(20)30466-9
  21. Holshue ML, DeBolt C, Lindquist S, et al. First Case of 2019 Novel Coronavirus in the United States. *N Engl J Med.* January 2020. doi:10.1056/nejmoa2001191
  22. Sun K, Chen J, Viboud C. Early epidemiological analysis of the coronavirus disease 2019 outbreak based on crowdsourced data: a population-level observational study. *Lancet Digit Heal.* 2020;0(0). doi:10.1016/S2589-7500(20)30026-1
  23. Huang C, Wang Y, Li X, et al. Clinical features of patients infected with 2019 novel coronavirus in Wuhan, China. *Lancet.* January 2020. doi:10.1016/S0140-6736(20)30183-5
  24. Shi H, Han X, Jiang N, et al. Radiological findings from 81 patients with COVID-19

pneumonia in Wuhan, China: a descriptive study. *Lancet Infect Dis.* 2020;0(0). doi:10.1016/S1473-3099(20)30086-4

25. Wang D, Hu B, Hu C, et al. Clinical Characteristics of 138 Hospitalized Patients With 2019 Novel Coronavirus-Infected Pneumonia in Wuhan, China. *JAMA.* February 2020. doi:10.1001/jama.2020.1585
26. André T, Boni C, Mounedji-Boudiaf L, et al. Oxaliplatin, fluorouracil, and leucovorin as adjuvant treatment for colon cancer. *N Engl J Med.* 2004;350(23):2343-2351. doi:10.1056/NEJMoa032709
27. Dunning JW, Merson L, Rohde GGU, et al. Open source clinical science for emerging infections. *Lancet Infect Dis.* 2014;14(1):8-9. doi:10.1016/S1473-3099(13)70327-X

## Regulation, Ethics and Governance

Protocol and any following amendment to the original protocol will be translated to the main language of the collaborative institution and submitted for the approval of each institutional review board (IRB). All protocols of the study will require approval by each institutional review board, before enrolment of patients. Sites should apply for a waiver of consent to be granted given the negligible risk nature of the study and the need for rapid data collection to inform pandemic responses globally.

### Conflict of interest

The investigators of the APELSON network DO NOT have any significant financial or personal interest that would reasonably appear to be affected by the proposed research activities.

### Data collection and Site Monitoring plan

#### Data Collection

Data will be collected in dedicated electronic forms and/or hard copies as provided by the SPRINT-SARI and ISARIC Organisations (APPENDIX B) and the ECMOCARD Steering Committee (APPENDIX C). Data for Coagulation Disorders and Thrombosis Sub-study can be found in the APPENDIX D. A custom-designed electronic case report form has been developed in REDcap, which is hosted at the University of Oxford and for all Australian centres will be hosted at Monash University, Melbourne, Australia. A custom-designed electronic case report form has been developed in REDcap for the Coagulation Disorders and Thrombosis Sub-study, which is hosted at the University of Queensland. Hard copies and electronic data will be kept for at least 7 years following the conclusion of the study. Each investigator will be responsible to collect and preserve data obtained at his/her collaborative institution.

#### Site Monitoring

Periodic conference calls will be organized with all investigators or investigators of specific collaborative centres to monitor the quality of the data collected, address specific issues in data collection and prepare future publications

#### Compensations

No compensation will be offered to collaborating institutions.

## Data Access

All essential documentation of the SPRINT-SARI/ECMOCARD and the Coagulation Disorders and Thrombosis Sub-study will be stored in an Investigator Study File (ISF), which will be held by the Critical Care Research Group (CCRG), University of Queensland. On completion of the study, this information will be archived by the CCRG. Following the publication of the primary and secondary outcomes, additional analyses could be undergone on the data collected. In the event of publications arising from these analyses, those responsible will need to provide the Chief Investigator with a copy of the manuscript for approval prior to submission.

## Feasibility

This is a multi-centre study performed within the COVID-19 Critical Care Consortium, which comprises the SPRINT-SARI, ISARIC, ELSO and APELSO networks of clinical research institutions, during an emergent new respiratory infection caused by the new COVID-19 virus. The study will be conducted in intensive care units with broad experience in mechanical ventilation, ECMO and coagulation disorders and thrombosis. Further intra-mural and extra-mural collaborations beyond the COVID-19 Critical Care Consortium and SPRINT-SARI, ISARIC and APELSO networks will be potentially pursued to promptly achieve goals. In summary, the COVID-19 Critical Care Consortium multidisciplinary and international research team of collaborators provides ideal conditions to perform reported study.

## Dissemination and Publication

### Publication policy

Ownership of the data arising from the study resides with the study teams. Data requested from SPRINT-SARI and EXCEL investigators will reside with their own study teams. After the study, results will be analysed and tabulated, and a study report will be prepared. This report will be made available to the study collaborators and the relevant IRBs. The study findings will be presented at national and international meetings. We plan to publish our study findings in a high-quality peer reviewed journal. SPRINT-SARI and EXCEL studies will be fully acknowledged in all publications and presentations.

### Authorship policy

Authorship will be determined according to the internationally agreed criteria for authorship ([www.icmje.org](http://www.icmje.org)). Authorship of parallel studies conducted outside of the main trial will be according to the individuals involved in the study but must acknowledge the contribution of the involved investigators.

For peer review only

1  
2  
3  
4  
5  
6  
7  
8  
9  
10  
11  
12  
13  
14  
15  
16  
17  
18  
19  
20  
21  
22  
23  
24  
25  
26  
27  
28  
29  
30  
31  
32  
33  
34  
35  
36  
37  
38  
39  
40  
41  
42  
43  
44  
45  
46  
47  
48  
49  
50  
51  
52  
53  
54  
55  
56  
57  
58  
59  
60

**SUPPLEMENT 2**

**COLLABORATING SITES**

## COLLABORATING SITES

| Country    | City                               | Site Name                      | Principal Investigator     |
|------------|------------------------------------|--------------------------------|----------------------------|
| Australia  | Brisbane                           | The Prince Charles Hospital    | Kiran Shekar               |
|            | Melbourne                          | The Alfred Hospital            | Carol Hodgson              |
|            | Gold Coast                         | Gold Coast University Hospital | James Winearls             |
|            | South Brisbane                     | Princess Alexandra Hospital    | James Walsham              |
|            |                                    | Queensland Children's Hospital | Adrian Mattke              |
|            | Canberra                           | Canberra Hospital              | Hemanth Hurkadli Veerendra |
|            | Perth                              | Perth Children's Hospital      | Simon Erickson             |
|            | Sydney                             | St Vincent's Hospital          | Hergen Buscher             |
|            |                                    | Royal North Shore Hospital     | Perre Janin                |
|            |                                    | Westmead Hospital              | Benjamin Davidson          |
|            |                                    | Prince of Wales Hospital       | Gavin Salt                 |
|            |                                    | St George Hospital             | Swapnil Pawar              |
|            |                                    | Royal Prince Alfred Hospital   | Andrew Cheng               |
|            |                                    | Nepean Hospital                | Richard Totaro             |
|            | Newcastle                          | John Hunter Hospital           | Ian Mark Seppelt           |
|            | Newcastle                          | John Hunter Hospital           | Jorge Brieva               |
|            | Melbourne                          | Box Hill Hospital              | Diarmuid O'Briain          |
| Geelong    | Geelong Hospital                   | Joseph McCaffrey               |                            |
| Hervey Bay | Hervey Bay Hospital (Wide Bay HHS) | Angela Ratsch                  |                            |
| Bundaberg  | Bundaberg Hospital (Wide Bay HHS)  | Angela Ratsch                  |                            |
| Adelaide   | Royal Adelaide Hospital            | Michael Farquharson            |                            |

|                    |                                                     |                                             |                                    |
|--------------------|-----------------------------------------------------|---------------------------------------------|------------------------------------|
|                    | Caboolture                                          | Caboolture Hospital                         | Mahesh Ramanan                     |
|                    | Redcliffe                                           | Redcliffe Hospital                          | Alexis Tabah                       |
|                    | Rockhampton                                         | Rockhampton Hospital                        | Antony Attokaran                   |
|                    | Launceston                                          | Launceston General Hospital                 | Matt Brain                         |
|                    | Melbourne                                           | Royal Children's Hospital                   | Warwick Butt                       |
| <b>New Zealand</b> | Auckland                                            | Auckland City Hospital                      | Shay McGuinness (CVICU)            |
| <b>Hong Kong</b>   | Hong Kong                                           | Tuen Mun Hospital                           | Kenny Chan King-Chung              |
|                    |                                                     | Princess Margaret Hospital                  | Dominic So                         |
|                    |                                                     | Queen Mary Hospital                         | Pauline Yeung, Simon Wai Ching Sin |
|                    |                                                     | Queen Elizabeth Hospital                    | George Ng                          |
|                    |                                                     | Pamela Youde Nethersole Eastern Hospital    | Hoi Ping Shum                      |
| <b>Indonesia</b>   | Jakarta                                             | National Cardiovascular Center Harapan Kita | Eva Marwali                        |
|                    |                                                     | Sulianti Saroso Hospital                    | Surya Oto Wijaya                   |
|                    |                                                     | Persahabatan Hospital                       | Erlina Burhan                      |
|                    |                                                     | Pelni Hospital                              | Amelya Hutahaean                   |
|                    |                                                     | Fatmawati Hospital                          | Azhari Taufik                      |
|                    |                                                     | Cipto Mangunkusumo Hospital                 | Yogi Prawira (Paeds)               |
|                    |                                                     |                                             | Dr Anas Alatas (Adult)             |
|                    |                                                     | Cengkareng Hospital                         | Dr Kamal                           |
|                    | Sanglah General Hospital                            | Dr. Sajinadiyasa (adult)                    |                                    |
|                    |                                                     | Dyah Kanya Wati (pead)                      |                                    |
| East Java          | Soetomo Hospital, Surabaya                          | Neurinda Permata Kusumastuti                |                                    |
|                    | Saiful Anwar Malang Hospital (Brawijaya University) | Dr Saptadi Yularito                         |                                    |



|              |                  |                                              |                                                          |
|--------------|------------------|----------------------------------------------|----------------------------------------------------------|
|              | West Java        | Hasan Sadikin Hospital                       | Gezy Giwangkancana (Adult)<br>Dadang H Somasetia (Paeds) |
|              | Surabaya         | Airlanna University                          | Dr Neurinda Permata Kusumastuti                          |
|              | Medan            | Adam Malik Hospital                          | Bastian Lubis                                            |
|              | Semarang         | Dr Kariadi Hospital Semarang                 | Moh Supriatna                                            |
|              | Yogyakarta       | Sardjito Hospital                            | Desy Rusmawatingtyas (Paeds)<br>Dr. Bhirowo (Adult)      |
| <b>Japan</b> | Sapporo          | Teine Keijinkai Hospital                     | Takako Akimoto                                           |
|              | Tokyo            | Nippon Medical School Hospital               | Singo Ichiba                                             |
|              | Kawasaki         | St Marianna Medical University Hospital      | Shigeki Fujitani (Adults)<br>Shimizu Naoki (Paeds)       |
|              | Utsunomiya       | Saiseikai Utsunomiya Hospital                | Keibun Liu                                               |
|              | Hokkaido         | Hokkaido University                          | Dr Koji Hoshino<br>Dr Yuk Uchinami                       |
|              | Kyoto            | Kyoto Medical Centre                         | Hiro Tanaka                                              |
|              | Yokohama         | Yokohama City University Medical Center      | Hayato Taniguci                                          |
|              | Aichi            | Tosei Hospital                               | Dr Yokoyama                                              |
|              | Maebashi         | Japan Red Cross Maebashi Hospital            | Hiroyuki Suzuki                                          |
|              | Gunma            | Gunma University Graduate School of Medicine | Kanamoto Masafumi                                        |
|              | Chiba            | Chiba University Graduate School of Medicine | Ryuzo Abe                                                |
|              | Hiroshima        | Hiroshima University                         | Shinichiro Ohshimo                                       |
|              | Tokyo            | Tokyo Metropolitan Medical Center            | Keiki Shimizu                                            |
|              | Hakodate         | Hakodate City hospital                       | Yoshihiro Takeyama                                       |
| Ryukyo       | Ryukyu Univesity | Ichiro Kukita                                |                                                          |

|                  |           |                                                                           |                    |
|------------------|-----------|---------------------------------------------------------------------------|--------------------|
|                  | Yokohama  | Saiseikai Yokohamashi Tobu Hospital                                       | Kenji Tamai        |
|                  | Okayama   | Okayama University Hospital                                               | Toshiyuki Aokage   |
|                  | Miyagi    | Tohoku Medical and pharmaceutical university                              | Tomoyuki Endo      |
|                  | Osaka     | Rinku general medical center (and Senshu trauma and critical care center) | Shingo Adachi (PI) |
|                  |           |                                                                           | Shota Nakao        |
|                  | Kuysu     | Fukuoka University                                                        | Kota Hoshino       |
|                  | Kyoto     | Kyoto Prefectural University of Medicine                                  | Satoru Hashimoto   |
|                  | Osaka     | Osaka City General Hospital                                               | Kazuaki Shigemitsu |
|                  | Chiba     | Kimitsu Chuo Hospital                                                     | Shinya Kitamura    |
|                  |           |                                                                           | Takashi Shimazui   |
|                  | Sapporo   | KKR Medical center                                                        | Masahiro Yamane    |
|                  | Hyogo     | Hyogo Prefectural Kakogawa Medical Center                                 | Akihiro Shimizu    |
|                  | Hyogo     | Hyogo Prefectural Kobe Children's Hospital                                | Hiroshi Kurosawa   |
|                  | Nagoya    | Nagoya University Graduate School of Medicine                             | Kasugai Daisuke    |
|                  | Mie       | Mie University Hospital                                                   | Asami Ito          |
|                  | Fujieda   | Fujieda Municipal General Hospital                                        | Motohiro Asaki     |
|                  | Osaka     | Saiseikai Senri Hospital                                                  | Masahiro Fukuda    |
|                  | Shimane   | Shimane University Hospital                                               | Yoshiaki Iwashita  |
|                  | Osaka     | National Cerebral and Cardiovascular Center                               | Dr. Koji Iihara    |
|                  | Miyagi    | Tohoku Medical and Pharmaceutical University                              | Tomoyuki Endo      |
| <b>Singapore</b> | Singapore | National Centre for Infectious Diseases                                   | Sennen Low         |
|                  |           |                                                                           | Shawn Vasoo        |
|                  |           | Tan Tock Seng Hospital                                                    | Chia Yew Woon      |
|                  |           |                                                                           | Benjamin Ho        |

|             |                  |                                                           |                                                  |                      |
|-------------|------------------|-----------------------------------------------------------|--------------------------------------------------|----------------------|
|             |                  | National University Hospital                              | Kollengode Ramanathan                            |                      |
|             |                  | KK Women's and Children's Hospital                        | Yee Hui Mok                                      |                      |
| South Korea | Gwangju          | Chonnam National University Hospital                      | Hwa Jin Cho                                      |                      |
|             |                  |                                                           | In Seok Jeong                                    |                      |
|             | Anyang           | Hallym University Sacred Heart Hospital                   | Sunghoon Park                                    |                      |
|             | Cheongju         | Chungbuk National University Hospital                     | Hye Won Jeong                                    |                      |
|             |                  |                                                           |                                                  |                      |
|             | Daegu            | Kyungbuk National University Hospital                     | Tak-hyuck Oh                                     |                      |
|             |                  |                                                           | Keimyung University Dong San Hospital            | Jae Burm Kim         |
|             | Seoul            | The Catholic University of Seoul St Mary Hospital         | Hyun Mi Kang                                     |                      |
|             |                  |                                                           | Seoul National University Children's Hospital    | Bongjin Lee          |
|             |                  |                                                           | Anam Korea University Hospital                   | Jae-Seung Jung       |
|             |                  |                                                           | Severance Hospital                               | Su Hwan Lee          |
|             |                  |                                                           | Seoul national university hospital               | Sang Min Lee         |
|             |                  |                                                           | Seoul National University Bundang Hospital       | Young-Jae Cho        |
| Taiwan      | Taipei           | National Taiwan University Hospital                       | Yih-Sharng Chen, Jung-Yien Chien, Chih-Hsieh     |                      |
| Thailand    | Bangkok          | Siriraj Hospital                                          | Pranya Sakiyalak                                 |                      |
| Vietnam     | Ho Chi Minh City | Hospital for Tropical Diseases                            | Trieu Huynh Trung                                |                      |
|             |                  |                                                           | Thuy Duong Bick                                  |                      |
| Italy       | Milan            | Fondazione IRCCS Ca' Granda Ospedale Maggiore Policlinico | Mauro Panigada                                   |                      |
|             |                  |                                                           | Antonio Pesenti                                  |                      |
|             | Rome             | Ospedale San Paolo                                        | Children's Hospital Bambino Gesù                 | Matteo Di Nardo      |
|             |                  |                                                           | Policlinico Umberto, Sapienza University of Rome | Francesco Alessandri |

|     |               |                                                             |                                                               |
|-----|---------------|-------------------------------------------------------------|---------------------------------------------------------------|
|     | Bologna       | Policlinico di S. Orsola, Università di Bologna             | Antonio Loforte                                               |
|     | Bergamo       | Bergamo Hospital                                            | Lorenzo Grazioli and Prof Lorini                              |
|     | Rome          | Fondazione Policlinico Universitario Agostino Gemelli IRCCS | Massimo Antonelli and Domenico Grieco                         |
|     | Genoa         | Ospedale Gaslini                                            | Andrea Moscatelli                                             |
|     |               | San Martino Hospital                                        | Paolo Pelosi                                                  |
|     | Parma         | Azienda Ospedaliero Universitaria Parma                     | Denise Battaglini                                             |
|     |               |                                                             | Sandra Rossi Marta                                            |
|     | Turin         | Le Molinette Hospital (Ospedale Molinette Torino)           | Velia Antonini                                                |
|     |               |                                                             | Luca Brazzi                                                   |
|     | Palermo       | ISMETT                                                      | Gabriele Sales                                                |
|     |               |                                                             | Antonio Arcadipane                                            |
|     | Florence      | Careggi Hospital                                            | Adriano Peris                                                 |
|     | Pisa          | Azienda Ospedaliero Universitaria Pisana                    | Fabio Guarracino                                              |
|     | Verona        | Verona Integrated University Hospital                       | Katia Donadello                                               |
|     | Padua         | Padua University Hospital (Policlinico of Padova)           | Andrea Dellamore and Paolo Navales                            |
|     | Trento        | Ospedale di Arco (Trento hospital)                          | MARCO Cavana and Alberto Cucino                               |
|     | Monza         | Ospedale San Gerardo                                        | Marco Giani                                                   |
|     | Borgo         | Borgo San Lorenzo Hospital                                  | Vieri Parrini                                                 |
| USA | New York City | Columbia University Medical Centre                          | Dan Brodie                                                    |
|     |               |                                                             | Alexis Serra                                                  |
|     |               |                                                             | Darryl Abrams                                                 |
|     | Los Angeles   | Northwell Health                                            | Effe Mihelis                                                  |
|     |               |                                                             | Presbyterian Hospital, New York/ Weill Cornell Medical Centre |
|     | Los Angeles   | Cedars-Sinai Medical Centre                                 | Dominic Emerson                                               |

|  |              |                                                                      |                  |
|--|--------------|----------------------------------------------------------------------|------------------|
|  |              | Ochsner LSA Health Shreveport                                        | Kristi Lofton    |
|  |              | Children's Hospital                                                  | Kimberly Kyle    |
|  |              | UCLA Medical Centre (Ronald Regan)                                   | Vadim Gudzenko   |
|  | Virginia     | Carilion Clinic                                                      | Mark Joseph      |
|  |              | INOVA Fairfax Hospital                                               | Steven Nathan    |
|  | Arizona      | Dignity Health St. Joseph's Hospital and Medical Center (SJHMC)      | Rajat Walia      |
|  | Albuquerque  | Presbyterian Hospital Services, Albuquerque                          | Irfan Khan       |
|  | San Diego    | University of California at San Diego                                | Cassia Yi        |
|  |              | Scripps Memorial Hospital La Jolla                                   | Scott McCaul     |
|  | Newark       | Christiana Care Health System's Centre for Heart and Vascular Health | Ray A Blackwell  |
|  | Santa Cruz   | Dignity Health Medical Group- Dominican                              | Marsha Moreno    |
|  | Florida      | Cleveland Clinic                                                     | Nicolas Brozzi   |
|  |              | University of Florida                                                | Giles John Peek  |
|  | St Louis     | Washington University in St. Louis/ Barnes Jewish Hospital           | Christy Kay      |
|  | Pittsburgh   | University of Pittsburgh Medical Centre                              | Raj Padmanabhan  |
|  | Omaha        | University of Nebraska Medical Centre                                | Lace Sindt       |
|  | Louisville   | Norton Children's Hospital                                           | Teka Siebenaler  |
|  |              | Baptist Health Louisville                                            | Emily Coxon      |
|  | Columbia     | University of South Carolina                                         | Luca Paoletti    |
|  |              |                                                                      | Laura Hollinger  |
|  | Indianapolis | Peyton Manning Children's Hospital                                   | Kay A Sichtung   |
|  | Buffalo      | Mercy Hospital of Buffalo                                            | Harsh Jain       |
|  | Indiana      | Indiana University Health                                            | Juan Salgado     |
|  | Washington   | George Washington University Hospital                                | Elizabeth Pocock |

|    |                |                                                                      |                      |
|----|----------------|----------------------------------------------------------------------|----------------------|
| 1  | Washington     | MedStar Washington Hospital Centre                                   | Akram Zaaqoq         |
| 2  | Cincinnati     | University of Cincinnati Medical Centre                              | Suzanne Bennett      |
| 3  | Irvine         | University of California, Irvine                                     | Jennifer Elia        |
| 4  | Salt Lake City | University of Utah Hospital                                          | Matthew Griffiee     |
| 5  | Durham         | Duke University Hospital                                             | Melissa Williams     |
| 6  | Cincinnati     | The Christ Hospital                                                  | Timothy Smith        |
| 7  | Cleveland      | University Hospital Cleveland Medical Centre (UH Cleveland hospital) | Colin McCloskey      |
| 8  | Hartford       | Hartford Healthcare                                                  | Ethan Kurtzman       |
| 9  | Atlanta        | Emory University Healthcare System                                   | Gabrielle Ragazzo    |
| 10 | Atlanta        | Children's Healthcare of Atlanta- Egleston Hospital                  | Micheal Heard        |
| 11 | Stanford       | Stanford University Hospital                                         | Clark Owyang         |
| 12 | Hershey        | Penn State Heath S. Hershey Medical Centre                           | Holly Roush          |
| 13 | Pittsburgh     | Allegheny General Hospital                                           | Subbarao Elapavaluru |
| 14 | Colorado       | Billings Clinic                                                      | Daniel Loverde D.O   |
| 15 | Boston         | Massachusetts General Hospital                                       | Lorenzo Berra        |
| 16 |                |                                                                      | Yuval Raz            |
| 17 | Poughkeepsie   | Vassar Brothers Medical Center (VBMC)                                | Jennifer Osofsky     |
| 18 | Kansas         | The University of Kansas Medical Centre                              | Brigid Flynn         |
| 19 | Santa Monica   | Providence Saint John's Health Centre                                | Anna Jung            |
| 20 | Columbus       | Ohio State University Medical Centre                                 | Veena Satyapriya     |
| 21 | Portland       | Oregon Health and Science University Hospital (OHSU)                 | Bishoy Zakhary       |
| 22 | Washington     | Providence Sacred Heart Children's Hospital                          | Carl P. Garabedian   |
| 23 | Lancaster      | Lancaster General Health                                             | Cathleen Forney      |
| 24 | Philadelphia   | Penn Medicine                                                        | Asad Usman           |

|  |               |                                                                         |                             |
|--|---------------|-------------------------------------------------------------------------|-----------------------------|
|  | New Haven     | Yale New Haven Hospital                                                 | Andres Oswaldo Razo Vazquez |
|  | Cincinnati    | Cincinnati Children's                                                   | Reanna Smith                |
|  | Macon         | The Medical Centre Navicent Health                                      | James Erskine               |
|  | Philadelphia  | Main Line Health Lankenau Medical Center)                               | Eric Gnall                  |
|  | Columbia      | University of Missouri                                                  | Shyam Shankar               |
|  | Oklahoma City | Oklahoma University Medical Center (OU)                                 | Ryan Kennedy                |
|  | Oklahoma City | INTEGRIS Baptist Medical Center                                         | Michael Harper              |
|  | Charlotte     | Novant Health (NH) Presbyterian Medical Centre                          | Hannah Flynn                |
|  | Minnesota     | M Health Fairview                                                       | Rhonda Bakken               |
|  | Fresno        | University of California, San Francisco-Fresno Clinical Research Centre | Mohamed Fayed               |
|  | Boston        | Tufts Medical Centre (and Floating Hospital for Children)               | Leslie Lussier              |
|  |               | Beth Israel Deaconess Medical Centre                                    | Wilson Grandin              |
|  | Seattle       | University of Washington in Seattle                                     | Jenelle Badulak             |
|  | Charleston    | Medical University of South Carolina                                    | Monika Cardona              |
|  | Atlanta       | Piedmont Atlanta Hospital                                               | Peter Barrett               |
|  | Chicago       | University of Chicago Cardiac Surgery                                   | Pamela Combs                |
|  |               | Northwestern Medicine                                                   | Randy McGregor              |
|  | Tulsa         | Oklahoma Heart Institute                                                | Rita Moreno                 |
|  | Phoenix       | John C Lincoln Medical Centre                                           | Celina Adams                |
|  |               | Banner University Medical Centre                                        | Stacey Gerle                |
|  | Norfolk       | Sentara Norfolk General Hospital                                        | Xian Qiao                   |
|  | York          | WellSpan Health - York Hospital                                         | Josh Fine                   |
|  | Rochester     | University of Rochester Medical Centre (UR Medicine)                    | Bill Hallinan               |
|  |               | Rochester General Hospital                                              | Meghan Nicholson            |



|                |              |                                                               |                                     |
|----------------|--------------|---------------------------------------------------------------|-------------------------------------|
|                | Kentucky     | University of Kentucky Medical Center                         | Thomas Tribble                      |
|                | Madison      | University of Wisconsin & American Family Children's Hospital | Jillian Koch                        |
|                | Milwaukee    | Medical College of Wisconsin (Froedtert Hospital)             | Cassandra Seefeldt                  |
|                | New Orleans  | Ochsner Clinic Foundation                                     | Julia Garcia-Diaz, Derek Vonderhaar |
|                | Philadelphia | St. Christopher's Hospital for Children                       | Daniel Marino                       |
|                | Alabama      | University of Alabama at Birmingham Hospital (UAB)            | Keith Wille                         |
|                | Portland     | Legacy Emanuel Medical Center                                 | Tawnya Ogston                       |
|                | Scottsdale   | Mayo Clinic College of Medicine                               | Ayan Sen                            |
|                | Iowa         | University of Iowa                                            | Lovkesh Arora                       |
|                | Texas        | Baylor All Saints Medical Centre, Forth Worth                 | Dr. Gonzo Gonzalez-Stawinski        |
|                |              | The Heart Hospital Baylor Plano, Plano                        | Dr Timothy George (PI)              |
|                |              | Baylor University Medical Centre, Dallas                      | Dr Dan Meyer (PI)                   |
|                |              | Baylor Scott & White Health - Temple                          | Dr Jorge Velazco (PI)               |
|                |              |                                                               | Margarite Grable                    |
|                |              | Doernbecher Children's Hospital                               | Wanda Fikes (CRC)                   |
|                |              | Doernbecher Children's Hospital                               | Amit Mehta                          |
|                |              | University of Texas Medical Branch                            | Yolanda Leyva                       |
|                |              | Cedar Park Regional Medical Center                            | Mark Sanders                        |
|                |              | UTHealth (University of Texas)                                | Lisa Janowaik                       |
| <b>England</b> | London       | Guy's and St Thomas NHS Foundation Trust Hospital             | Nicholas Barrett/Luigi Camporota    |
|                |              | Royal Brompton & Harefield NHS Foundation Trust               | Brij Patel                          |
|                | Cambridge    | Papworth Hospitals NHS Foundation Trust                       | Alain Vuysteke                      |
|                | Leicester    | University Hospitals of Leicester NHS Trust                   | Yusuff Hakeem                       |
|                | Manchester   | Manchester University NHS Foundation Trust - Wythenshawe      | Tim Felton/Miguel Garcia            |

|                    |               |                                                             |                                                 |
|--------------------|---------------|-------------------------------------------------------------|-------------------------------------------------|
| <b>Scotland</b>    | Edinburgh     | Royal Infirmary Edinburgh                                   | Kenneth Baillie                                 |
|                    | Aberdeen      | Aberdeen Royal Infirmary (Foresterhill Health Campus)       | Emma Hartley                                    |
| <b>Wales</b>       | Swansea       | Swansea Hospital                                            | Lenny Ivatt                                     |
| <b>Netherlands</b> | Nijmegen      | Radboud University Medical Centre                           | Tim Frenzel                                     |
|                    | St. Antonious | St. Antonius Hospital                                       | Nicole Van Belle                                |
|                    | Maastricht    | Maastricht University Medical Centre                        | Roberto Lorusso                                 |
| <b>Belgium</b>     | Edegem        | University of Antwerp                                       | Gerdy Debeuckelaere                             |
|                    | Brussels      | Universite Libre de Bruxelles                               | Fabio Taccone                                   |
|                    | Lodelinsart   | Hospital Civil Marie Curie                                  | Anne Joosten                                    |
|                    | Leuven        | Collaborative Centre Department Cardiac Surgery, UZ Leuven  | Klaartje Van den Bossche and Bart Mey           |
| <b>Kuwait</b>      | Hadiya        | Al-Adan Hospital                                            | Tala Al-Dabbous                                 |
|                    | Kuwait City   | Kuwait ECLS program, Al-Amiri & Jaber Al-Ahmed Hospitals    | Abdulrahman Al-Fares                            |
| <b>Saudi Arabi</b> | Mecca         | King Abdullah Medical City Specialist Hospital              | Jihan Fatani                                    |
|                    | Jeddah        | King Abdullah Medical Complex                               | Husam Baeissa;Dr. Mohamed Azzam;Dr. S<br>Ashgar |
|                    | Tabuk         | King Salman Hospital NWAf                                   | Ayman AL Masri                                  |
|                    | Riyadh        | Prince Mohammed bin Abdulaziz Hospital                      | Ahmed Rabie                                     |
|                    |               | King Faisal Specialist Hospital and Research Center         | Abdullah Al-Hudaib<br>Alyaa Elhazmi             |
| <b>Austria</b>     | Vienna        | Sozialmedizinisches Zentrum Süd - Kaiser-Franz-Josef-Spital | Tamara Seitz                                    |
|                    |               | Medical University of Vienna                                | Nina Buchtele (ICU)<br>Michael Schwameis (ED)   |
| <b>Philippines</b> | Quezon City   | National Kidney and Transplant Institute                    | Joselito Chavez                                 |
| <b>Estonia</b>     | Tallinn       | North Estonia Medical Centre                                | Indrek Ratsep                                   |

|               |                                                                                                                             |                                                     |                                  |                      |
|---------------|-----------------------------------------------------------------------------------------------------------------------------|-----------------------------------------------------|----------------------------------|----------------------|
|               | Tartu                                                                                                                       | Tartu University Hospital                           | Olavi Maasikas                   |                      |
| <b>Canada</b> | Toronto                                                                                                                     | Toronto General Hospital                            | Eddy Fan, Kathleen Exconde       |                      |
|               | Toronto                                                                                                                     | Mount Sinai Hospital                                | Eddy Fan                         |                      |
|               | Winnipeg                                                                                                                    | University of Manitoba                              | Rohit Singal                     |                      |
|               |                                                                                                                             |                                                     | Rakesh Arora                     |                      |
|               | Edmonton                                                                                                                    | University of Alberta (Mazankowski Heart Institute) | Gurmeet Singh                    |                      |
|               |                                                                                                                             |                                                     | Sean Bagshaw                     |                      |
|               | Hamilton                                                                                                                    | Hamilton General Hospital                           | Faizan Amin                      |                      |
|               | Montreal                                                                                                                    | McGill University Health Centre                     | Gordan Samoukoviv                |                      |
|               |                                                                                                                             | University de Montreal                              | Yoan Lamarche                    |                      |
|               | New Westminster                                                                                                             | Royal Columbian Hospital                            | Derek Gunning                    |                      |
| Calgary       | University of Calgary (Peter Lougheed Centre, Foothills Medical Centre, South Health Campus and Rockyview General Hospital) | Ken Parhar and Cassidy Codan                        |                                  |                      |
| Manitoba      | St Boniface Hospital                                                                                                        | Rakesh Arora                                        |                                  |                      |
| <b>India</b>  | Kolkata                                                                                                                     | Medica Superspeciality Hospital                     | Arpan Chakraborty                |                      |
| <b>Spain</b>  | Alicante                                                                                                                    | Hospital Universitario Sant Joan d'Alacant          | Angel Sanchez                    |                      |
|               | Lugo                                                                                                                        | Hospital Universitario Lucus Augusti                | Ignacio Martinez                 |                      |
|               | Zaragoza                                                                                                                    | Hospital Nuestra Señora de Gracia                   | Ruth Jorge García                |                      |
|               | Barcelona                                                                                                                   | Hospital Universitario de Bellvitge                 | Rafael Máñez Mendiluce           |                      |
|               |                                                                                                                             |                                                     | Hospital Clinic, Barcelona       | Antoni Torres        |
|               |                                                                                                                             |                                                     | Hospital Universitari Sagrat Cor | Adrian Ceccato       |
|               |                                                                                                                             |                                                     | Hospital de Sant Pau             | Ferran Roche-Campo   |
|               |                                                                                                                             |                                                     | Clínica Sagrada Família          | Arturo Huerta Garcia |
|               | Vall d'Hebron University Hospital, Barcelona                                                                                | Ricard Ferrer                                       |                                  |                      |

|                  |              |                                                                |                                |
|------------------|--------------|----------------------------------------------------------------|--------------------------------|
|                  |              |                                                                | Jordi Riera                    |
|                  | Valladolid   | Rio Hortega University Hospital                                | Pablo Blanco                   |
|                  | Caceres      | San Pedro de Alcantara Hospital                                | Juan Fernando Masa Jiménez     |
|                  | Cadiz        | Hospital Universitario Virgen de Valme                         | Ana Loza Vazquez               |
|                  | Navarra      | Clinica Universidad de Navarra                                 | Nahikari Saltera               |
| <b>Argentina</b> | Buenos Aires | Hospital de Clinicas                                           | Carlos Luna                    |
|                  | Buenos Aires | National University of Comahue                                 | Gustavo Zabert                 |
|                  | Buenos Aires | Hospital Alemán                                                | Javier Osatnik                 |
|                  | Buenos Aires | Clinica Bazterrica                                             | Fernando Palizas               |
|                  | Lisbon       | University Hospital CHLN                                       | Joao Miguel Ribeiro            |
|                  | Portugal     | São João Hospital Centre, Porto                                | Sérgio Gaião                   |
| <b>Colombia</b>  | Bucaramanga  | Fundación Cardiovascular de Colombia                           | Leonardo Salazar               |
|                  | Cali         | Clinica Valle de Lilli                                         | Diego Fernando Bautista Rincón |
|                  | Bogota       | Fundación Clinica Shaio                                        | Estefania Giraldo              |
| <b>Chile</b>     | Las Condes   | Clinica Las Condez                                             | Roderigo Diaz                  |
|                  | Santiago     | Hospital del Tórax                                             | Francisco Arancibia            |
|                  | Santiago     | Clinica Alemana De Santiago                                    | Jerónimo Graf                  |
| <b>Germany</b>   | Regensburg   | Universitätsklinikum Regensburg (Klinik für Innere Medizin II) | Maximilian Malfertheiner       |
|                  | Donaustauf   | Donaustauf Hospital                                            | Annette Schweda                |
|                  | Regensburg   | Barmherzige Bruder Regensburg                                  | Stephan Schroll                |
|                  | Munich       | Medizinische Klinik und Poliklinik II                          | Stephanie Stecher              |
|                  | Berlin       | Charite-Universitätsmedizin Berlin                             | Roland Francis                 |
|                  | Passau       | Klinikum Passau                                                | Johannes Gebauer               |
|                  | Nuremberg    | Paracelsus Medical University Nuremberg                        | Matthias Baumgaertel           |

|                     |                |                                                                           |                               |
|---------------------|----------------|---------------------------------------------------------------------------|-------------------------------|
|                     | Frankfurt      | Universitätsklinikum Frankfurt (University Hospital Frankfurt)(Uniklinik) | Gösta Lotz                    |
|                     | Stockwerk      | Universitätsspital Bern, Universitätsklinik für Herz- und Gefässchirurgie | Beate Hugi-Mayr               |
| <b>Brazil</b>       | Belo Horizonte | Hospital Mater Dei                                                        | Ana Luiza Valle Martins       |
|                     | São Paulo      | Universidade de São Paulo                                                 | Marcelo Amato                 |
|                     | São Paulo      | Hospital das Clínicas da Faculdade de Medicina da USP (HCFMUSP)           | Suely Pereira Zeferino        |
|                     | Rio de Janeiro | Universidade Federal Fluminense                                           | Marcello Salgado              |
| <b>Ireland</b>      | Galway         | National University of Ireland Galway                                     | John Laffey                   |
|                     | Dublin         | St James's University Hospital                                            | Ignacio Martin-Loeches        |
|                     |                | Mater Misericordiae University Hospital                                   | Ed Carton                     |
|                     | Crumlin        | Children's Health Ireland (CHI) at Crumlin                                | Sunimol Joseph                |
| <b>Poland</b>       | Krakow         | University Hospital in Krakow                                             | Konstanty S. Szuldrzynski     |
|                     | Ghansk         | Gdansk Medical University                                                 | Wojtek Karolak                |
| <b>South Africa</b> | Johannesburg   | Nelson Mandela Children's Hospital                                        | Krubin Naidoo                 |
|                     |                | Netcare Unitas ECMO Centre                                                | Marlice van Dyk               |
|                     | Cape Town      | Groote Schuur Hospital                                                    | David Thomson                 |
| <b>Qatar</b>        | Qatar          | Hamad General Hospital - Weill Cornell Medical College in Qatar           | Ibrahim Hassan and Ali Hssain |
| <b>Egypt</b>        | Cairo          | Cairo University Hospital                                                 | Ahmad Abdelaziz               |
| <b>Sweden</b>       | Gothenburg     | Sahlgrenska University Hospital                                           | Pia Watson                    |
| <b>Croatia</b>      | Zagreb         | University Hospital Dubrava                                               | Nikola Bradic                 |
| <b>Luxembourg</b>   | Barble         | Luxembourg Heart Center                                                   | Katja Ruck                    |
| <b>Ukraine</b>      | Kyiv           | Heart Institute Ministry of Health of Ukraine                             | Serhii Sudakevych             |
| <b>Switzerland</b>  | Bern           | Inselspital University Hospital                                           | Beate Hugi-Mayr               |
| <b>Turkey</b>       | Izmir          | Dr. Suat Seren Chest Diseases and Surgery Practice and Training Centre    | Cenk Kirakli                  |
| <b>Mexico</b>       | Zapopan        | Hospital Puerta de Hierro                                                 | Anna Greti                    |

|                 |         |                                                                          |               |
|-----------------|---------|--------------------------------------------------------------------------|---------------|
| <b>UAE</b>      | Dubai   | American Hospital                                                        | Balu Bhaskar  |
| <b>Lebanon</b>  | Beirut  | Pediatric and Neonatal Cardiac intensive care at the American University | Jana Assy     |
| <b>Kenya</b>    | Nairobi | Kenyatta National Hospital (KNH)                                         | George Nyale  |
|                 | Nairobi | Kenyatta University Teaching, Referral & Research Hospital               | George Nyale  |
| <b>Tunisia</b>  | Tunis   | Charles Nicolle University Hospital                                      | Ali Cherif    |
| <b>Zimbabwe</b> | Harare  | St Annes Hospital                                                        | Jackie Stone  |
| <b>Morocco</b>  | Oujda   | Mohammed VI university hospital                                          | Brahim Housni |
|                 | Rabat   | Rabat university hospital                                                | Younes Oujidi |
|                 |         |                                                                          | Jawad Tadili  |

Peer review only

1  
2  
3  
4  
5  
6  
7  
8  
9  
10  
11  
12  
13  
14  
15  
16  
17  
18  
19  
20  
21  
22  
23  
24  
25  
26  
27  
28  
29  
30  
31  
32  
33  
34  
35  
36  
37  
38  
39  
40  
41  
42  
43  
44  
45  
46  
47  
48  
49  
50  
51  
52  
53  
54  
55  
56  
57  
58  
59  
60

For peer review only

**SUPPLEMENT 3**

**REGIONAL LEADS/ASSISTANTS**

**OPERATIONAL TEAM**

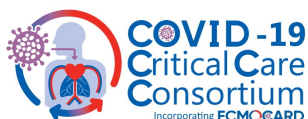



## REGIONAL LEADS/ASSISTANTS

| Country            | Regional Lead                                     | Regional Lead Affiliation                            | Regional Coordinator/Assistant             |
|--------------------|---------------------------------------------------|------------------------------------------------------|--------------------------------------------|
| <b>Australia</b>   | Hergen Buscher                                    | St Vincent's Hospital, Sydney                        | India Lye                                  |
| <b>Australia</b>   | Carol Hodgson                                     | The Alfred Hospital, Melbourne                       |                                            |
| <b>New Zealand</b> | Shay McGuinness                                   | Auckland City Hospital                               | Rachael Parke                              |
| <b>Hong Kong</b>   | Simon Wai Ching Sin                               | Queen Mary Hospital, Hong Kong                       | Pauline Yeung                              |
| <b>Indonesia</b>   | Eva Marwali                                       | National Cardiovascular Center Harapan Kita, Jakarta |                                            |
| <b>Indonesia</b>   | Erlina Burhan                                     | Persahabatan Hospital, Jakarta                       |                                            |
| <b>Japan</b>       | Shingo Ichiba                                     | Nippon Medical School Hospital, Tokyo                | Keibun Liu, Takako Akimoto                 |
| <b>Singapore</b>   | Kollengode Ramanathan                             | National University Hospital, Singapore              |                                            |
| <b>South Korea</b> | Young-Jae Cho                                     | Seoul National University Bundang Hospital           | Hwa Jin Cho, Jae-Seung Jung                |
| <b>Taiwan</b>      | Yih-Sharng Chen, Jung-Yien Chien, Chih-Hsien Wang | National Taiwan University Hospital                  |                                            |
| <b>Vietnam</b>     | Vinh Chau                                         | Hospital for Tropical Diseases, Ho Chi Minh City     | Trieu Huynh, Sophie Yacoub, Angela McBride |
| <b>Italy</b>       | Antonio Pesenti, Mauro Panigada                   | Fondazione IRCCS Policlinico of Milan                | Michela Leone and Sebastiano Colombo       |
| <b>USA</b>         | Robert Bartlett                                   | University of Michigan Medical School                | Leticia Helms                              |
| <b>USA</b>         | Daniel Brodie                                     | Columbia University Medical Centre                   |                                            |
| <b>USA</b>         | Phillip Mason                                     | Brooke Army Medical Center, San Antonio              |                                            |
| <b>USA</b>         | Archit Sharma                                     | University of Iowa Hospitals & Clinics               |                                            |

|                           |                          |                                                         |                      |
|---------------------------|--------------------------|---------------------------------------------------------|----------------------|
| <b>USA</b>                | Christian Bermudez       | Hospital of the University of Pennsylvania              |                      |
| <b>USA</b>                | Vadim Gudzenko           | UCLA Medical Centre (Ronald Regan)                      |                      |
| <b>USA</b>                | Bishoy Zakhary           | Oregon Health and Science University Hospital, Portland |                      |
| <b>England</b>            | Brij Patel               | Royal Brompton & Harefield NHS Foundation Trust         | Johnny Millar        |
| <b>Scotland<br/>Wales</b> | Johnny Millar            | University of Glasgow                                   |                      |
| <b>Netherlands</b>        | Roberto Lorusso          | Maastricht University Medical Centre                    |                      |
| <b>Belgium</b>            | Fabio Taccone            | Universite Libre de Bruxelles                           |                      |
| <b>Kuwait</b>             | Abdulrahman Al-Fares     | Al-Amiri & Jaber Al-Ahmed Hospitals                     |                      |
| <b>Saudi Arabi</b>        | Alyaa Elhazmi            | King Faisal Specialist Hospital and Research Center     |                      |
| <b>Saudi Arabi</b>        | Ahmed Rabie              | Prince Mohammed bin Abdulaziz Hospital                  |                      |
| <b>Austria</b>            | Nina Buchtele            | Medical University of Vienna                            |                      |
| <b>Philippines</b>        | Joselito Chavez          | National Kidney and Transplant Institute                |                      |
| <b>Estonia</b>            | Indrek Ratsep            | North Estonia Medical Centre                            | Silver Heinsar       |
| <b>Canada</b>             | Eddy Fan                 | Toronto General Hospital Research Institute             | Kathleen Exconde     |
| <b>India</b>              | Arpan Chakraborty        | Medica Superspeciality Hospital                         | Kiran Shekar         |
| <b>Spain</b>              | Antoni Torres            | Hospital Clinic, Barcelona                              |                      |
| <b>Spain</b>              | Ricard Ferrer            | Hospital Vall d'Hebron                                  | Jordi Riera Del Brio |
| <b>Argentina</b>          | Carlos Luna              | Hospital de Clinicas                                    |                      |
| <b>Colombia</b>           | Leonardo Salazar         | Fundación Cardiovascular de Colombia                    |                      |
| <b>Germany</b>            | Maximilian Malfertheiner | Universitätsklinikum Regensburg                         |                      |

|                     |                            |                                       |  |
|---------------------|----------------------------|---------------------------------------|--|
| <b>Brazil</b>       | Marcelo Amato              | Universidade de São Paulo             |  |
| <b>Brazil</b>       | Marcello Salgado           | Federal University of Rio de Janeiro  |  |
| <b>Ireland</b>      | John Laffey                | National University of Ireland Galway |  |
| <b>Poland</b>       | Konstanty S. Szuldrzynski  | University Hospital in Krakow         |  |
| <b>South Africa</b> | David Thomsom              | Groote Schuur Hospital                |  |
| <b>Qatar</b>        | Ibrahim Hassan, Ali Hssain | Hamad General Hospital                |  |
| <b>Egypt</b>        | Ahmad Abdelaziz            | Cairo University Hospital             |  |
| <b>Sweden</b>       | Pia Watson                 | Sahlgrenska University Hospital       |  |
| <b>Zimbabwe</b>     | Jackie Stone               | St Annes Hospital                     |  |

peer review only

**COORDINATING CENTRE OPERATIONAL TEAM**

1. Cooper Ansicar
2. Chris Chan
3. William Crawford
4. Gaenor Cross
5. Courtney Dwyer
6. Alessandro Ferraioli
7. Halah Hassan
8. Samuel Huth
9. Lacey Irvine
10. Christine Jackman
11. Varun Karnik
12. Katrina Ki
13. Niki McGuinness
14. Hollier O'Neill
15. Janice Reid
16. Kei Sato
17. Declan Sela
18. Yvgeniy Shek
19. Emily Wood
20. Stephanie Yerkovich
21. Taylor Zhang

1  
2  
3  
4  
5  
6  
7  
8  
9  
10  
11  
12  
13  
14  
15  
16  
17  
18  
19  
20  
21  
22  
23  
24  
25  
26  
27  
28  
29  
30  
31  
32  
33  
34  
35  
36  
37  
38  
39  
40  
41  
42  
43  
44  
45  
46  
47  
48  
49  
50  
51  
52  
53  
54  
55  
56  
57  
58  
59  
60

For peer review only

# SUPPLEMENT 4

# CASE REPORT FORM



## Data Collection Form

### CORE CASE RECORD FORM (EOT ICU Admis)

#### 1. UPON ICU ADMISSION – Please complete the below data as of the date and time of the patient's admission to the ICU

**DATE OF ICU ADMISSION:** \_\_\_\_ / \_\_\_\_ / \_\_\_\_ (ONLY DATE, FROM 14/12/2019)

**1.1 HEIGHT (cm):** \_\_\_\_\_

If this data has already been entered into the 'Signs and Symptoms' section of the ISARIC CRF, please DO NOT re-enter the data here. Leave this '1.1 Height' box blank.

**1.2 BODY WEIGHT (Kg):** \_\_\_\_\_

If this data has already been entered into the 'Signs and Symptoms' section of the ISARIC CRF, please DO NOT re-enter the data here. Leave this '1.2 Body Weight' box blank.

#### 1.3 Arterial Hypertension

- Yes  
 No

If this data has already been entered into the 'Co-Morbidities & Risk Factors' section of the ISARIC CRF, please DO NOT re-enter the data here. Leave this '1.3 Hypertension' box blank.

#### 1.3a Chronic anti-hypertensive therapy (if 'Yes' to 1.3. Please select up to three)

- Diuretics  
 Calcium channel blockers  
 ACE inhibitors

If this data has already been entered in the 'Pre-Admission Medication' section of the ISARIC CRF, please DO NOT re-enter the data here. Leave this 'ACE inhibitors' box blank.

- Angiotensin II receptor antagonists

If this data has already been entered in the 'Pre-Admission Medication' section of the ISARIC CRF, please DO NOT re-enter the data here. Leave this 'Angiotensin II receptor antagonists' box blank.

- Renin inhibitors  
 Beta blockers  
 Alpha blockers  
 Vasodilators  
 Aldosterone receptor antagonist  
 Alpha-2 adrenergic receptor agonists  
 Not applicable

#### 1.4 GASTROINTESTINAL AND PANCREATIC COMORBIDITIES

- Yes  
 No

**1.5 HEPATIC AND BILIARY COMORBIDITIES**

- Yes  
 No

**1.6 HAEMATOLOGIC AND SPLEEN COMORBIDITIES**

- Yes  
 No

**1.7 IMMUNOLOGICAL AND TRANSPLANT COMORBIDITIES**

- Yes  
 No

**1.8 ENDOCRINOLOGICAL COMORBIDITIES**

- Yes  
 No

**1.9 GENITO-URINARY COMORBIDITIES**

- Yes  
 No

**1.10 CHRONIC ALCOHOL ABUSE**

- Yes  
 No

**1.11 INTRAVENOUS DRUGS ABUSE**

- Yes  
 No

**1.12 IMMUNO-COMPETENT**

- Yes  
 No

**1.13 APACHE II SCORE:** \_\_\_\_\_ (ONLY NUMBERS FROM 0 to 71)

APACHE II score can be calculated at the following link <https://www.mdcalc.com/apache-ii-score>

- Not available

**1.14 SOFA SCORE:** \_\_\_\_\_ (ONLY NUMBERS FROM 0 to 24)

SOFA score can be calculated at the following link <https://www.mdcalc.com/sequential-organ-failure-assessment-sofa-score>

- Not available

**BLOOD GAS ANALYSIS (Qs 1.15 – 1.20) – Please document the values associated with the ‘worst’ blood gas analysis in the 6 hours prior to ICU admission. ‘Worst’ blood gas is defined as the blood gas with the lowest PaO<sub>2</sub>/FiO<sub>2</sub> ratio.**

**1.15 ARTERIAL pH IN THE LAST 6h:** \_\_\_\_\_ (ONLY NUMBERS FROM 6.500 TO 7.600)



Please document the values associated with the 'worst' blood gas analysis in the 6 hours prior to ICU admission. 'Worst' is defined as the blood gas with the lowest PaO<sub>2</sub>/FiO<sub>2</sub> ratio.  Not available

**1.16 ARTERIAL PARTIAL PRESSURE OF OXYGEN IN THE LAST 6h (mmHg):** \_\_\_\_\_ (ONLY NUMBERS FROM 20 TO 500)

Please document the values associated with the 'worst' blood gas analysis in the 6 hours prior to ICU admission. 'Worst' is defined as the blood gas with the lowest PaO<sub>2</sub>/FiO<sub>2</sub> ratio.  Not available

**1.17 ARTERIAL PARTIAL PRESSURE OF CARBON DIOXIDE IN THE LAST 6h (mmHg):** \_\_\_\_\_ (ONLY NUMBERS FROM 10 TO 100)

Please document the values associated with the 'worst' blood gas analysis in the 6 hours prior to ICU admission. 'Worst' is defined as the blood gas with the lowest PaO<sub>2</sub>/FiO<sub>2</sub> ratio.  Not available

**1.18 ARTERIAL BICARBONATE (HCO<sub>3</sub><sup>-</sup>) IN THE LAST 6h** \_\_\_\_\_ mEq/L

Please document the values associated with the 'worst' blood gas analysis in the 6 hours prior to ICU admission. 'Worst' is defined as the blood gas with the lowest PaO<sub>2</sub>/FiO<sub>2</sub> ratio.

Not available

**1.19 ARTERIAL Base excess IN THE LAST 6h** \_\_\_\_\_ mmol/L

Please document the values associated with the 'worst' blood gas analysis in the 6 hours prior to ICU admission. 'Worst' is defined as the blood gas with the lowest PaO<sub>2</sub>/FiO<sub>2</sub> ratio.

Not available

**1.20 Lactate IN THE LAST 6h** \_\_\_\_\_ mmol/L

Please document the values associated with the 'worst' blood gas analysis in the 6 hours prior to ICU admission. 'Worst' is defined as the blood gas with the lowest PaO<sub>2</sub>/FiO<sub>2</sub> ratio.  Not available

**1.21 Ferritin in the last 12 hours:** \_\_\_\_\_ (ng/mL)

Only numbers from 0-1000

Not available

**1.22 D-dimer in the last 12 hours:**

\_\_\_\_\_ (ng/mL or mcg/mL)

Only numbers from 0-15000

Not available

**1.23 Troponin in the last 12 hours:**

Troponin T: \_\_\_\_\_ (ng/mL or ng/L)

Troponin I: \_\_\_\_\_ (ng/mL or ng/L)

High sensitivity troponin T: \_\_\_\_\_ (ng/mL or ng/L)

High sensitivity troponin I: \_\_\_\_\_ (ng/mL or ng/L)

Not available

**1.24 Cardiac BNP in the last 12 hours:**

\_\_\_\_\_ (picograms/mL)

Only numbers between 0-1000

Not available

1  
2  
3  
4  
5 **1.25 Upon ICU admission, did the patient present with cutaneous manifestations?**

- 6  Yes  
7  
8  No  
9  
10  Not available

11 **If yes to 1.25, type of cutaneous manifestations (please select up to three (3) options)**

- 12  
13  Bullae  
14  Macules  
15  Nodules  
16  Papules  
17  Plaques  
18  Purpura  
19  Pustules  
20  Rash  
21  Scale  
22  Urticaria  
23  Vesicles  
24  
25  Other: \_\_\_\_\_  
26  
27  
28  
29  
30

31 **If yes to 1.25, specify the involved regions (please select up to three (3) options):**

- 32  
33  Face  
34  Trunk  
35  Upper limbs  
36  Hands  
37  Lower limbs  
38  Feet  
39  
40  
41  
42  
43  
44  
45  
46  
47  
48  
49  
50  
51  
52  
53  
54  
55  
56  
57  
58  
59  
60

For peer review only

## CORE CASE RECORD FORM (EOT Mech Vent)

**2. UPON COMMENCEMENT OF MECHANICAL VENTILATION - 'Mechanical ventilation' includes invasive mechanical ventilation via an endotracheal tube or tracheostomy only. Importantly, this module will be active only when you click 'YES' in the field '1.17 Invasive ventilation?' of the SPRINT-SARI form.**

**2.1 DATE OF START OF MECHANICAL VENTILATION:** \_\_\_\_ / \_\_\_\_ / \_\_\_\_ (ONLY DATE, FROM 14/12/2019)

### 2.2 SITE OF INTUBATION

- Outside hospital
- Intensive Care Unit
- Emergency Department
- Hospital Ward
- Different hospital, then patient was transferred
- Other

### 2.3 TYPE OF INTUBATION

- Elective
- Emergent

### 2.4 CARDIAC ARREST

- Yes
- No

### 2.5 VENTILATORY SUPPORT BEFORE INTUBATION

- High-Flow Oxygen Ventilation
- Mask non-invasive ventilation
- Full Face-mask non-invasive ventilation
- Helmet non-invasive ventilation
- Simple face mask oxygen therapy
- Venturi mask oxygen therapy
- Non re-breather face mask oxygen therapy
- Nasal prongs oxygen therapy
- Other
- Not available

**BLOOD GAS ANALYSIS (Qs 2.6 – 2.11) – Please document the values associated with the 'worst' blood gas analysis in the 6 hours prior to commencement of mechanical ventilation. 'Worst' blood gas is defined as the blood gas with the lowest PaO<sub>2</sub>/FiO<sub>2</sub> ratio.**

**2.6 ARTERIAL pH IN THE 6 HOURS BEFORE START OF MV:** \_\_\_\_\_ (ONLY NUMBERS FROM 6.500 TO 7.600)

Please document the values associated with the 'worst' blood gas analysis in the 6 hours prior to commencement of mechanical ventilation. 'Worst' is defined as the blood gas with the lowest PaO<sub>2</sub>/FiO<sub>2</sub> ratio.

- Not available

**2.7 ARTERIAL PARTIAL PRESSURE OF OXYGEN (mmHg) IN THE 6 HOURS BEFORE START OF MV:** \_\_\_\_\_ (ONLY NUMBERS FROM 20 TO 500)

Please document the values associated with the 'worst' blood gas analysis in the 6 hours prior to commencement of mechanical ventilation. 'Worst' is defined as the blood gas with the lowest PaO<sub>2</sub>/FiO<sub>2</sub> ratio.

Not available

**2.8 ARTERIAL PARTIAL PRESSURE OF CARBON DIOXIDE (mmHg) IN THE 6 HOURS BEFORE START OF MV:** \_\_\_\_\_ (ONLY NUMBERS FROM 10 TO 100)

Please document the values associated with the 'worst' blood gas analysis in the 6 hours prior to commencement of mechanical ventilation. 'Worst' is defined as the blood gas with the lowest PaO<sub>2</sub>/FiO<sub>2</sub> ratio.

Not available

**2.9 ARTERIAL HCO<sub>3</sub><sup>-</sup> IN THE 6 HOURS BEFORE START OF MV** \_\_\_\_\_ mEq/L

Please document the values associated with the 'worst' blood gas analysis in the 6 hours prior to commencement of mechanical ventilation. 'Worst' is defined as the blood gas with the lowest PaO<sub>2</sub>/FiO<sub>2</sub> ratio.

Not available

**2.10 ARTERIAL Base excess IN THE 6 HOURS BEFORE START OF MV** \_\_\_\_\_ mmol/L

Please document the values associated with the 'worst' blood gas analysis in the 6 hours prior to commencement of mechanical ventilation. 'Worst' is defined as the blood gas with the lowest PaO<sub>2</sub>/FiO<sub>2</sub> ratio.

Not available

**2.11 Lactate IN THE 6 HOURS BEFORE START OF MV** \_\_\_\_\_ mmol/L

Please document the values associated with the 'worst' blood gas analysis in the 6 hours prior to commencement of mechanical ventilation. 'Worst' is defined as the blood gas with the lowest PaO<sub>2</sub>/FiO<sub>2</sub> ratio.

Not available

**2.12 USE OF CONTINUOUS RENAL REPLACEMENT THERAPY BEFORE START OF MV**

Yes

No

**2.13 USE OF VASOACTIVE DRUGS BEFORE START OF MV**

Yes

No

**2.14 USE OF CARDIAC ASSIST DEVICES BEFORE START OF MV**

Yes

No

**2.15 ANTIBIOTICs BEFORE START OF MV**

Amikacin

Amoxicillin

Amoxicillin +  
Clavulanate

Ampicillin

Ampicillin + Sulbactam

Atovaquone

Azithromycin

Aztreonam

Bacampicillin

Bacitracin

Capreomycin

Carbenicillin indanyl  
sodium

Cefaclor

Cefadroxil

Cefamandole

Cefazolin

Cefdinir

Cefditoren

Cefepime

Cefixime

Cefmetazole

Cefonicid

Cefoperazone

Cefotaxime

Cefotetan

Cefoxitin

Cefpodoxime Proxetil

Cefprozil

- |                          |                       |                          |                                                              |
|--------------------------|-----------------------|--------------------------|--------------------------------------------------------------|
| <input type="checkbox"/> | Ceftaroline           | <input type="checkbox"/> | Neomycin                                                     |
| <input type="checkbox"/> | Ceftazidime           | <input type="checkbox"/> | Netilmicin                                                   |
| <input type="checkbox"/> | Ceftibuten            | <input type="checkbox"/> | Nitrofurantoin                                               |
| <input type="checkbox"/> | Ceftizoxime           | <input type="checkbox"/> | Nitrofurazone                                                |
| <input type="checkbox"/> | Ceftobiprole          | <input type="checkbox"/> | Norfloxacin                                                  |
| <input type="checkbox"/> | Ceftriaxone           | <input type="checkbox"/> | Novobiocin                                                   |
| <input type="checkbox"/> | Cefuroxime            | <input type="checkbox"/> | Ofloxacin                                                    |
| <input type="checkbox"/> | Cephalexin            | <input type="checkbox"/> | Oxacillin                                                    |
| <input type="checkbox"/> | Cephalothin           | <input type="checkbox"/> | Oxytetracycline                                              |
| <input type="checkbox"/> | Cephapirin            | <input type="checkbox"/> | Penicillin                                                   |
| <input type="checkbox"/> | Cephradine            | <input type="checkbox"/> | Piperacillin                                                 |
| <input type="checkbox"/> | Chloramphenicol       | <input type="checkbox"/> | Piperacillin +<br>Tazobactam                                 |
| <input type="checkbox"/> | Cinoxacin             | <input type="checkbox"/> | Podofilox                                                    |
| <input type="checkbox"/> | Ciprofloxacin         | <input type="checkbox"/> | Polymyxin B                                                  |
| <input type="checkbox"/> | Clarithromycin        | <input type="checkbox"/> | Quinupristin +<br>Dalfopristin                               |
| <input type="checkbox"/> | Clindamycin           | <input type="checkbox"/> | Retapamulin                                                  |
| <input type="checkbox"/> | Cloxacillin           | <input type="checkbox"/> | Rifapentine                                                  |
| <input type="checkbox"/> | Colistimethate        | <input type="checkbox"/> | Rifaximin                                                    |
| <input type="checkbox"/> | Cycloserine           | <input type="checkbox"/> | Saturated Solution of<br>Potassium Iodide (SSKI)             |
| <input type="checkbox"/> | Daptomycin            | <input type="checkbox"/> | Sparfloxacin                                                 |
| <input type="checkbox"/> | Demeclocycline        | <input type="checkbox"/> | Spectinomycin                                                |
| <input type="checkbox"/> | Dicloxacillin         | <input type="checkbox"/> | Streptomycin                                                 |
| <input type="checkbox"/> | Dirithromycin         | <input type="checkbox"/> | Sulfadiazine                                                 |
| <input type="checkbox"/> | Doripenem             | <input type="checkbox"/> | Sulfamethoxazole                                             |
| <input type="checkbox"/> | Doxycycline           | <input type="checkbox"/> | Sulfisoxazole                                                |
| <input type="checkbox"/> | Enoxacin              | <input type="checkbox"/> | Sulphur, precipitated in<br>petrolatum                       |
| <input type="checkbox"/> | Ertapenem             | <input type="checkbox"/> | TCA (trichloroacetic<br>acid), BCA<br>(bichloroacetic acid). |
| <input type="checkbox"/> | Erythromycin          | <input type="checkbox"/> | Teicoplanin                                                  |
| <input type="checkbox"/> | Fosfomycin            | <input type="checkbox"/> | Telavancin                                                   |
| <input type="checkbox"/> | Gatifloxacin          | <input type="checkbox"/> | Telithromycin                                                |
| <input type="checkbox"/> | Gemifloxacin          | <input type="checkbox"/> | Terbinafine                                                  |
| <input type="checkbox"/> | Gentamicin            | <input type="checkbox"/> | Tetracycline                                                 |
| <input type="checkbox"/> | Grepafloxacin         | <input type="checkbox"/> | Ticarcillin                                                  |
| <input type="checkbox"/> | Imipenem/Cilastatin   | <input type="checkbox"/> | Ticarcillin + Clavulanic<br>Acid                             |
| <input type="checkbox"/> | Imiquimod             | <input type="checkbox"/> | Tigecycline                                                  |
| <input type="checkbox"/> | Kanamycin             | <input type="checkbox"/> | Tobramycin                                                   |
| <input type="checkbox"/> | Levofloxacin          | <input type="checkbox"/> | Trimethoprim                                                 |
| <input type="checkbox"/> | Lincomycin            | <input type="checkbox"/> | Trimethoprim +<br>Sulfamethoxazole                           |
| <input type="checkbox"/> | Linezolid             | <input type="checkbox"/> | Trovafloxacin                                                |
| <input type="checkbox"/> | Lomefloxacin          | <input type="checkbox"/> | Vancomycin                                                   |
| <input type="checkbox"/> | Loracarbef            |                          |                                                              |
| <input type="checkbox"/> | Mafenide              |                          |                                                              |
| <input type="checkbox"/> | Meropenem             |                          |                                                              |
| <input type="checkbox"/> | Methenamine hippurate |                          |                                                              |
| <input type="checkbox"/> | Methicillin           |                          |                                                              |
| <input type="checkbox"/> | Metronidazole         |                          |                                                              |
| <input type="checkbox"/> | Mezlocillin           |                          |                                                              |
| <input type="checkbox"/> | Minocycline           |                          |                                                              |
| <input type="checkbox"/> | Moxifloxacin          |                          |                                                              |
| <input type="checkbox"/> | Mupirocin             |                          |                                                              |
| <input type="checkbox"/> | Nafcillin             |                          |                                                              |
| <input type="checkbox"/> | Nalidixic Acid        |                          |                                                              |

For peer review only

## CORE CASE RECORD FORM (EOT Start ECMO)

**3. UPON COMMENCEMENT OF ECMO. Importantly, this module will be active only when you click 'YES' in the field '1.18 ECLS?' of the SPRINT-SARI form.**

3.1 DATE OF START OF ECMO: \_\_\_/\_\_\_/\_\_\_ (ONLY DATE FROM 14/12/2019)

3.2 Is this patient enrolled in the EXCEL study?

- Yes  
 No

3.3 If Yes, what is the patients EXCEL study number \_\_\_\_\_

3.4 LOCATION OF ECMO CANNULATION:

- Same Hospital  
 Other Hospital, then patient was retrieved and transferred

3.5 Type and Manufacturer of centrifugal blood pump driven circuit: \_\_\_\_\_ (TEXT)

3.6 Type and Manufacturer of low-resistance oxygenator: \_\_\_\_\_ (TEXT)

3.7 TYPE OF ECMO:

- Venous-venous  
 Venous-arterial

3.8 DRAINAGE CANNULA INSERTION SITE:

- Left femoral vein  
 Left internal jugular vein  
 Right femoral vein  
 Right internal jugular vein

3.9 RETURN CANNULA INSERTION SITE:

- Left femoral vein  
 Left internal jugular vein  
 Right femoral vein  
 Right internal jugular vein  
 Left femoral artery  
 Right femoral artery

3.10 CARDIAC ARREST BEFORE START OF ECMO

- Yes  
 No

3.11 USE OF PRONE POSITION BEFORE START OF ECMO:

- Yes  
 No

3.12 USE OF NEUROMUSCULAR BLOCKADE BEFORE START OF ECMO:

- Yes  
 No

3.13 USE OF RECRUITMENT MANOEUVRES BEFORE START OF ECMO:

- Yes  
 No

**3.14 USE OF INHALED NITRIC OXIDE BEFORE START OF ECMO:**

- Yes  
 No

**3.15 USE OF BICARBONATE BEFORE START OF ECMO**

- Yes  
 No

**3.16 VENTILATORY MODE BEFORE START OF ECMO:**

- Synchronized Intermittent Mandatory Ventilation – Volume-Controlled (SIMV-V)  
 Synchronized Intermittent Mandatory Ventilation – Pressure-Controlled (SIMV-P)  
 Volume Controlled Ventilation  
 Pressure Controlled Ventilation  
 Pressure Regulated Volume Control (PRVC)  
 Airway Pressure Release Ventilation (APRV)  
 Pressure Support Ventilation (PSV)  
 Volume Support Ventilation (VSV)  
 High Frequency Oscillatory (HFO)  
 Bylevel Positive Airway Pressure (BiPAP)  
 Continuous Positive Airway Pressure (CPAP)  
 Proportional Assist Ventilation (PAV)  
 Neurally Adjusted Ventilatory Assist (NAVA)  
 Other: \_\_\_\_\_ (TEXT)

**MECHANICAL VENTILATION & BLOOD GAS ANALYSIS (Qs 3.17- 3.28) – Please document the ‘worst’ value in the 6 hours before the commencement of ECMO. ‘Worst’ means the values associated with the arterial blood gas with the lowest PaO<sub>2</sub>/FiO<sub>2</sub> ratio. Please report ventilatory settings associated with the worst arterial blood gas.**

**3.17 INSPIRATORY FRACTION OF OXYGEN IN THE 6 HOURS BEFORE START OF ECMO: \_\_\_\_\_**  
(ONLY NUMBERS, BETWEEN 21 and 100)

Please document the values associated with the ‘worst’ blood gas analysis in the 6 hours prior to commencement of ECMO. ‘Worst’ is defined as the blood gas with the lowest PaO<sub>2</sub>/FiO<sub>2</sub> ratio.

- Not available

**3.18 RESPIRATORY RATE IN THE 6 HOURS BEFORE START OF ECMO (breaths/min): \_\_\_\_\_**  
(ONLY NUMBERS, BETWEEN 2 and 60)

Please document the values associated with the ‘worst’ blood gas analysis in the 6 hours prior to commencement of ECMO. ‘Worst’ is defined as the blood gas with the lowest PaO<sub>2</sub>/FiO<sub>2</sub> ratio.

- Not available

**3.19 TIDAL VOLUME (ml/Kg of Ideal Body Weight): \_\_\_\_\_** (ONLY NUMBERS, BETWEEN 1 and 14)

Please document the values associated with the ‘worst’ blood gas analysis in the 6 hours prior to commencement of ECMO. ‘Worst’ is defined as the blood gas with the lowest PaO<sub>2</sub>/FiO<sub>2</sub> ratio.



Ideal Body Weight formula:

Male patients:  $50 + (0.91 \times [\text{height in cm} - 152.4])$

Female patients:  $45.5 + (0.91 \times [\text{height in cm} - 152.4])$

Not available

**3.20 POSITIVE END EXPIRATORY PRESSURE IN THE 6 HOURS BEFORE START OF ECMO (cmH<sub>2</sub>O):** \_\_\_\_\_ (ONLY NUMBERS, BETWEEN 0 and 25)

Please document the values associated with the 'worst' blood gas analysis in the 6 hours prior to commencement of ECMO. 'Worst' is defined as the blood gas with the lowest PaO<sub>2</sub>/FiO<sub>2</sub> ratio.

Not available

**3.21 PEAK AIRWAY PRESSURE IN THE 6 HOURS BEFORE START OF ECMO (cmH<sub>2</sub>O):** \_\_\_\_\_ (ONLY NUMBERS, BETWEEN 0 and 85)

Please document the values associated with the 'worst' blood gas analysis in the 6 hours prior to commencement of ECMO. 'Worst' is defined as the blood gas with the lowest PaO<sub>2</sub>/FiO<sub>2</sub> ratio.

Not available

**3.22 AIRWAY PLATEAU PRESSURE IN THE 6 HOURS BEFORE START OF ECMO (cmH<sub>2</sub>O):** \_\_\_\_\_ (ONLY NUMBERS, BETWEEN 0 and 50)

Please document the values associated with the 'worst' blood gas analysis in the 6 hours prior to commencement of ECMO. 'Worst' is defined as the blood gas with the lowest PaO<sub>2</sub>/FiO<sub>2</sub> ratio.

Not available

**3.23 ARTERIAL pH IN THE 6 HOURS BEFORE START OF ECMO:** \_\_\_\_\_ (ONLY NUMBERS FROM 6.500 TO 7.600)

Please document the values associated with the 'worst' blood gas analysis in the 6 hours prior to commencement of ECMO. 'Worst' is defined as the blood gas with the lowest PaO<sub>2</sub>/FiO<sub>2</sub> ratio.

Not available

**3.24 ARTERIAL PARTIAL PRESSURE OF OXYGEN IN THE 6 HOURS BEFORE START OF ECMO (mmHg):** \_\_\_\_\_ (ONLY NUMBERS FROM 20 TO 500)

Please document the values associated with the 'worst' blood gas analysis in the 6 hours prior to commencement of ECMO. 'Worst' is defined as the blood gas with the lowest PaO<sub>2</sub>/FiO<sub>2</sub> ratio.

Not available

**3.25 ARTERIAL PARTIAL PRESSURE OF CARBON DIOXIDE IN THE 6 HOURS BEFORE START OF ECMO (mmHg):** \_\_\_\_\_ (ONLY NUMBERS FROM 10 TO 150)

Please document the values associated with the 'worst' blood gas analysis in the 6 hours prior to commencement of ECMO. 'Worst' is defined as the blood gas with the lowest PaO<sub>2</sub>/FiO<sub>2</sub> ratio.

Not available

**3.26 ARTERIAL HCO<sub>3</sub><sup>-</sup> IN THE 6 HOURS BEFORE START OF ECMO** \_\_\_\_\_ mEq/L

Please document the values associated with the 'worst' blood gas analysis in the 6 hours prior to commencement of ECMO. 'Worst' is defined as the blood gas with the lowest PaO<sub>2</sub>/FiO<sub>2</sub> ratio.

Not available

**3.27 ARTERIAL Base excess IN THE 6 HOURS BEFORE START OF ECMO** \_\_\_\_\_ mmol/L

Please document the values associated with the 'worst' blood gas analysis in the 6 hours prior to commencement of ECMO. 'Worst' is defined as the blood gas with the lowest PaO<sub>2</sub>/FiO<sub>2</sub> ratio.

Not available

**3.28 Lactate IN THE 6 HOURS BEFORE START OF ECMO** \_\_\_\_\_ mmol/L

Please document the values associated with the 'worst' blood gas analysis in the 6 hours prior to commencement of ECMO. 'Worst' is defined as the blood gas with the lowest PaO<sub>2</sub>/FiO<sub>2</sub> ratio.

Not available

**3.29 USE OF CONTINUOUS RENAL REPLACEMENT THERAPY BEFORE START OF ECMO:**

- Yes  
 No

**3.30 USE OF VASOACTIVE DRUGS BEFORE START OF ECMO:**

- Yes  
 No

**3.31 USE OF CARDIAC ASSIST DEVICE BEFORE START OF ECMO:**

- Yes  
 No

**3.32 USE OF ANTIBIOTICS BEFORE START OF ECMO:**

- Yes  
 No

**3.33 ANTIBIOTICS BEFORE START OF ECMO:**

- Yes  
 No

- |                                                    |                                                       |                                               |
|----------------------------------------------------|-------------------------------------------------------|-----------------------------------------------|
| <input type="checkbox"/> Amikacin                  | <input type="checkbox"/> Capreomycin                  | <input type="checkbox"/> Cefmetazole          |
| <input type="checkbox"/> Amoxicillin               | <input type="checkbox"/> Carbenicillin indanyl sodium | <input type="checkbox"/> Cefonicid            |
| <input type="checkbox"/> Amoxicillin + Clavulanate | <input type="checkbox"/> Cefaclor                     | <input type="checkbox"/> Cefoperazone         |
| <input type="checkbox"/> Ampicillin                | <input type="checkbox"/> Cefadroxil                   | <input type="checkbox"/> Cefotaxime           |
| <input type="checkbox"/> Ampicillin + Sulbactam    | <input type="checkbox"/> Cefamandole                  | <input type="checkbox"/> Cefotetan            |
| <input type="checkbox"/> Atovaquone                | <input type="checkbox"/> Cefazolin                    | <input type="checkbox"/> Cefoxitin            |
| <input type="checkbox"/> Azithromycin              | <input type="checkbox"/> Cefdinir                     | <input type="checkbox"/> Cefpodoxime Proxetil |
| <input type="checkbox"/> Aztreonam                 | <input type="checkbox"/> Cefditoren                   | <input type="checkbox"/> Cefprozil            |
| <input type="checkbox"/> Bacampicillin             | <input type="checkbox"/> Cefepime                     | <input type="checkbox"/> Ceftaroline          |
| <input type="checkbox"/> Bacitracin                | <input type="checkbox"/> Cefixime                     | <input type="checkbox"/> Ceftazidime          |
|                                                    |                                                       | <input type="checkbox"/> Ceftibuten           |

- |                          |                       |                          |                                                              |
|--------------------------|-----------------------|--------------------------|--------------------------------------------------------------|
| <input type="checkbox"/> | Ceftizoxime           | <input type="checkbox"/> | Neomycin                                                     |
| <input type="checkbox"/> | Ceftobiprole          | <input type="checkbox"/> | Netilmicin                                                   |
| <input type="checkbox"/> | Ceftriaxone           | <input type="checkbox"/> | Nitrofurantoin                                               |
| <input type="checkbox"/> | Cefuroxime            | <input type="checkbox"/> | Nitrofurazone                                                |
| <input type="checkbox"/> | Cephalexin            | <input type="checkbox"/> | Norfloxacin                                                  |
| <input type="checkbox"/> | Cephalothin           | <input type="checkbox"/> | Novobiocin                                                   |
| <input type="checkbox"/> | Cephapirin            | <input type="checkbox"/> | Ofloxacin                                                    |
| <input type="checkbox"/> | Cephradine            | <input type="checkbox"/> | Oxacillin                                                    |
| <input type="checkbox"/> | Chloramphenicol       | <input type="checkbox"/> | Oxytetracycline                                              |
| <input type="checkbox"/> | Cinoxacin             | <input type="checkbox"/> | Penicillin                                                   |
| <input type="checkbox"/> | Ciprofloxacin         | <input type="checkbox"/> | Piperacillin                                                 |
| <input type="checkbox"/> | Clarithromycin        | <input type="checkbox"/> | Piperacillin +<br>Tazobactam                                 |
| <input type="checkbox"/> | Clindamycin           | <input type="checkbox"/> | Podofilox                                                    |
| <input type="checkbox"/> | Cloxacillin           | <input type="checkbox"/> | Polymyxin B                                                  |
| <input type="checkbox"/> | Colistimethate        | <input type="checkbox"/> | Quinupristin +<br>Dalfopristin                               |
| <input type="checkbox"/> | Cycloserine           | <input type="checkbox"/> | Retapamulin                                                  |
| <input type="checkbox"/> | Daptomycin            | <input type="checkbox"/> | Rifapentine                                                  |
| <input type="checkbox"/> | Demeclocycline        | <input type="checkbox"/> | Rifaximin                                                    |
| <input type="checkbox"/> | Dicloxacillin         | <input type="checkbox"/> | Saturated Solution of<br>Potassium Iodide (SSKI)             |
| <input type="checkbox"/> | Dirithromycin         | <input type="checkbox"/> | Sparfloxacin                                                 |
| <input type="checkbox"/> | Doripenem             | <input type="checkbox"/> | Spectinomycin                                                |
| <input type="checkbox"/> | Doxycycline           | <input type="checkbox"/> | Streptomycin                                                 |
| <input type="checkbox"/> | Enoxacin              | <input type="checkbox"/> | Sulfadiazine                                                 |
| <input type="checkbox"/> | Ertapenem             | <input type="checkbox"/> | Sulfamethoxazole                                             |
| <input type="checkbox"/> | Erythromycin          | <input type="checkbox"/> | Sulfisoxazole                                                |
| <input type="checkbox"/> | Fosfomycin            | <input type="checkbox"/> | Sulphur, precipitated in<br>petrolatum                       |
| <input type="checkbox"/> | Gatifloxacin          | <input type="checkbox"/> | TCA (trichloroacetic<br>acid), BCA<br>(bichloroacetic acid). |
| <input type="checkbox"/> | Gemifloxacin          | <input type="checkbox"/> | Teicoplanin                                                  |
| <input type="checkbox"/> | Gentamicin            | <input type="checkbox"/> | Telavancin                                                   |
| <input type="checkbox"/> | Grepafloxacin         | <input type="checkbox"/> | Telithromycin                                                |
| <input type="checkbox"/> | Imipenem/Cilastatin   | <input type="checkbox"/> | Terbinafine                                                  |
| <input type="checkbox"/> | Imiquimod             | <input type="checkbox"/> | Tetracycline                                                 |
| <input type="checkbox"/> | Kanamycin             | <input type="checkbox"/> | Ticarcillin                                                  |
| <input type="checkbox"/> | Levofloxacin          | <input type="checkbox"/> | Ticarcillin + Clavulanic<br>Acid                             |
| <input type="checkbox"/> | Lincomycin            | <input type="checkbox"/> | Tigecycline                                                  |
| <input type="checkbox"/> | Linezolid             | <input type="checkbox"/> | Tobramycin                                                   |
| <input type="checkbox"/> | Lomefloxacin          | <input type="checkbox"/> | Trimethoprim                                                 |
| <input type="checkbox"/> | Loracarbef            | <input type="checkbox"/> | Trimethoprim +<br>Sulfamethoxazole                           |
| <input type="checkbox"/> | Mafenide              | <input type="checkbox"/> | Trovafloxacin                                                |
| <input type="checkbox"/> | Meropenem             | <input type="checkbox"/> | Vancomycin                                                   |
| <input type="checkbox"/> | Methenamine hippurate |                          |                                                              |
| <input type="checkbox"/> | Methicillin           |                          |                                                              |
| <input type="checkbox"/> | Metronidazole         |                          |                                                              |
| <input type="checkbox"/> | Mezlocillin           |                          |                                                              |
| <input type="checkbox"/> | Minocycline           |                          |                                                              |
| <input type="checkbox"/> | Moxifloxacin          |                          |                                                              |
| <input type="checkbox"/> | Mupirocin             |                          |                                                              |
| <input type="checkbox"/> | Nafcillin             |                          |                                                              |
| <input type="checkbox"/> | Nalidixic Acid        |                          |                                                              |

#### 4. DAILY CASE RECORD FORM

Complete one form 24 hours after commencement of mechanical ventilation, and daily up to discontinuation of mechanical ventilation or death, whichever occurs first **Importantly, parameters related to mechanical ventilation or ECMO will be active only when you click 'YES' in the field '1.17 Invasive ventilation?' or when you click 'YES' in the field '1.18 ECLS?', respectively, of the SPRINT-SARI form.**

4.1 DATE: \_\_\_\_\_ (ONLY DATE, FROM 14/12/2019)

#### 4.2 PATIENT POSITION IN THE LAST 24h:

Please report the position applied predominantly during the 24 hours.

- Supine  
 Prone

4.3 HIGHEST ECMO FLOW RATE IN THE LAST 24h (L/min): \_\_\_\_\_

4.4 HIGHEST ECMO GAS FLOW RATE IN THE LAST 24h (L/min): \_\_\_\_\_

#### 4.5 ECMO CIRCUIT CHANGE IN THE LAST 24h:

- Yes  
 No

#### 4.6 USE OF NEUROMUSCULAR BLOCKADE IN THE LAST 24h:

- Yes  
 No

#### 4.7 USE OF RECRUITMENT MANOEUVRES IN THE LAST 24h:

- Yes  
 No

#### 4.8 USE OF INHALED NITRIC OXIDE IN THE LAST 24h:

- Yes  
 No

#### 4.9 MOST FREQUENT VENTILATORY MODE IN THE LAST 24h:

- Synchronized Intermittent Mandatory Ventilation – Volume-Controlled (SIMV-V)  
 Synchronized Intermittent Mandatory Ventilation – Pressure-Controlled (SIMV-P)  
 Volume Controlled Ventilation  
 Pressure Controlled Ventilation  
 Pressure Regulated Volume Control (PRVC)  
 Airway Pressure Release Ventilation (APRV)  
 Pressure Support Ventilation (PSV)  
 Volume Support Ventilation (VSV)  
 High Frequency Oscillatory (HFO)  
 Bylevel Positive Airway Pressure (BiPAP)  
 Continuous Positive Airway Pressure (CPAP)

- 1  
2  
3  
4  
5  
6  
7
- Proportional Assist Ventilation (PAV)
  - Neurally Adjusted Ventilatory Assist (NAVA)
  - Other: \_\_\_\_\_ (TEXT)

8  
9  
10  
11  
12

**MECHANICAL VENTILATION & BLOOD GAS ANALYSIS (Qs 4.10 – 4.21) – Please document the ‘worst’ value in the last 24 hours. ‘Worst’ means the values associated with the arterial blood gas with the lowest PaO<sub>2</sub>/FiO<sub>2</sub> ratio. Please report ventilatory settings associated with the worst arterial blood gas.**

13  
14  
15

**4.10 INSPIRATORY FRACTION OF OXYGEN IN THE LAST 24h:** \_\_\_\_\_ (ONLY NUMBERS, BETWEEN 21 and 100)

16  
17  
18

Please document the values associated with the ‘worst’ blood gas analysis in the last 24 hours. ‘Worst’ is defined as the blood gas with the lowest PaO<sub>2</sub>/FiO<sub>2</sub> ratio.

19

Not available

20  
21  
22

**4.11 RESPIRATORY RATE IN THE LAST 24h (breaths/min):** \_\_\_\_\_ (ONLY NUMBERS, BETWEEN 2 and 60)

23  
24

Please document the values associated with the ‘worst’ blood gas analysis in the last 24 hours. ‘Worst’ is defined as the blood gas with the lowest PaO<sub>2</sub>/FiO<sub>2</sub> ratio.  Not available

25  
26

**4.12 TIDAL VOLUME IN THE LAST 24h (ml/Kg of Ideal Body Weight):** \_\_\_\_\_ (ONLY NUMBERS, BETWEEN 1 and 14)

27  
28  
29

Please document the values associated with the ‘worst’ blood gas analysis in the last 24 hours. ‘Worst’ is defined as the blood gas with the lowest PaO<sub>2</sub>/FiO<sub>2</sub> ratio. Ideal Body Weight formula:

30  
31

Male patients:  $50 + (0.91 \times [\text{height in cm} - 152.4])$

32  
33

Female patients:  $45.5 + (0.91 \times \{\text{height in cm} - 152.4\})$

Not available

34  
35  
36

**4.13 POSITIVE END EXPIRATORY PRESSURE IN THE LAST 24h (cmH<sub>2</sub>O):** \_\_\_\_\_ (ONLY NUMBERS, BETWEEN 0 and 25)

37  
38

Please document the values associated with the ‘worst’ blood gas analysis in the last 24 hours. ‘Worst’ is defined as the blood gas with the lowest PaO<sub>2</sub>/FiO<sub>2</sub> ratio.  Not available

39  
40  
41

**4.14 AIRWAY PLATEAU PRESSURE IN THE LAST 24h (cmH<sub>2</sub>O):** \_\_\_\_\_ (ONLY NUMBERS, BETWEEN 0 and 50)

42  
43  
44

Please document the values associated with the ‘worst’ blood gas analysis in the last 24 hours. ‘Worst’ is defined as the blood gas with the lowest PaO<sub>2</sub>/FiO<sub>2</sub> ratio.  Not available

45  
46

**4.15 ARTERIAL pH IN THE LAST 24h:** \_\_\_\_\_ (ONLY NUMBERS FROM 6.500 TO 7.600)

47  
48  
49

Please document the values associated with the ‘worst’ blood gas analysis in the last 24 hours. ‘Worst’ is defined as the blood gas with the lowest PaO<sub>2</sub>/FiO<sub>2</sub> ratio.  Not available

50  
51

**4.16 ARTERIAL PARTIAL PRESSURE OF OXYGEN IN THE LAST 24h: (mmHg):** \_\_\_\_\_ (ONLY NUMBERS FROM 20 TO 500)

52  
53  
54

Please document the values associated with the ‘worst’ blood gas analysis in the last 24 hours. ‘Worst’ is defined as the blood gas with the lowest PaO<sub>2</sub>/FiO<sub>2</sub> ratio.  Not available

55  
56  
57

**4.17 ARTERIAL PARTIAL PRESSURE OF CARBON DIOXIDE IN THE LAST 24h: (mmHg):** \_\_\_\_\_ (ONLY NUMBERS FROM 10 TO 100)

Please document the values associated with the ‘worst’ blood gas analysis in the last 24 hours. ‘Worst’ is defined as the blood gas with the lowest PaO<sub>2</sub>/FiO<sub>2</sub> ratio.  Not available

**4.18 ARTERIAL HCO<sub>3</sub><sup>-</sup> IN THE LAST 24h:** \_\_\_\_\_ mEq/L

Please document the values associated with the ‘worst’ blood gas analysis in the last 24 hours. ‘Worst’ is defined as the blood gas with the lowest PaO<sub>2</sub>/FiO<sub>2</sub> ratio.  Not available

**4.19 ARTERIAL Base excess IN THE LAST 24h:** \_\_\_\_\_ mmol/L

Please document the values associated with the ‘worst’ blood gas analysis in the last 24 hours. ‘Worst’ is defined as the blood gas with the lowest PaO<sub>2</sub>/FiO<sub>2</sub> ratio.  Not available

**4.20 Lactate IN THE LAST 24h:** \_\_\_\_\_ mmol/L

Please document the values associated with the ‘worst’ blood gas analysis in the last 24 hours. ‘Worst’ is defined as the blood gas with the lowest PaO<sub>2</sub>/FiO<sub>2</sub> ratio.

Not available

**If this data has already been entered in the ‘Daily Case Report Form – Laboratory Results’ section of the ISARIC CRF, please DO NOT re-enter the data here. Please leave ‘4.20 Lactate’ blank.**

**4.21 CREATININE IN THE LAST 24h (mg/dL):** \_\_\_\_\_

Please document the values associated with the ‘worst’ blood gas analysis in the last 24 hours. ‘Worst’ is defined as the blood gas with the lowest PaO<sub>2</sub>/FiO<sub>2</sub> ratio.

Not available

**If this data has already been entered in the ‘Daily Case Report Form – Laboratory Results’ section of the ISARIC CRF, please DO NOT re-enter the data here. Please leave ‘4.21 Creatinine’ blank.**

**4.22 USE OF CONTINUOUS RENAL REPLACEMENT THERAPY:**

- Yes
- No

**4.23 USE OF VASOACTIVE DRUGS IN THE LAST 24h:**

- Yes
- No

**4.24 TYPE OF VASOACTIVE DRUG 1:**

- Dobutamine
- Dopamine
- Enoximone
- Epinephrine: YES  NO
- Esmolol
- Levosimendan
- Metaraminol
- Metoprolol
- Milrinone
- Nicardipine
- Nitroglycerin
- Nitroprusside
- Norepinephrine: YES  NO
- Phenylephrine
- Tolazoline
- Vasopressin

1  
2  
3  
4 **4.25 HIGHEST DOSE OF VASOACTIVE DRUG 1 IN THE LAST 24h (mcg/Kg/min):** \_\_\_\_\_  
5

6 **4.26 TYPE OF VASOACTIVE DRUG 2:**

- 7  
8  Dobutamine   
9  Dopamine   
10  Enoximone   
11  Epinephrine: YES  NO   
12  Esmolol   
13  Levosimendan   
14  Metaraminol   
15  Metoprolol   
16  Milrinone   
17  Nicardipine   
18  Nitroglycerin   
19  Nitroprusside   
20  Norepinephrine: YES  NO   
21  Phenylephrine   
22  Tolazoline   
23  Vasopressin   
24  
25

26  
27 **4.27 HIGHEST DOSE OF VASOACTIVE DRUG 2 IN THE LAST 24h (mcg/Kg/min):** \_\_\_\_\_  
28

29  
30  
31 **4.28 TYPE OF VASOACTIVE DRUG 3:**

- 32  Dobutamine   
33  Dopamine   
34  Enoximone   
35  Epinephrine: YES  NO   
36  Esmolol   
37  Levosimendan   
38  Metaraminol   
39  Metoprolol   
40  Milrinone   
41  Nicardipine   
42  Nitroglycerin   
43  Nitroprusside   
44  Norepinephrine: YES  NO   
45  Phenylephrine   
46  Tolazoline   
47  Vasopressin   
48  
49

50  
51 **4.29 HIGHEST DOSE OF VASOACTIVE DRUG 3 IN THE LAST 24h (mcg/Kg/min):** \_\_\_\_\_  
52

53 **4.30 USE OF CARDIAC ASSIST DEVICES IN THE LAST 24h:**

- 54  Yes  
55  No

56 **4.31 USE OF ANTIBIOTICS IN THE LAST 24h:**  
57  
58



- Yes
- No

ANTIBIOTICS:

- |                                                       |                                                |                                                                                 |
|-------------------------------------------------------|------------------------------------------------|---------------------------------------------------------------------------------|
| <input type="checkbox"/> Amikacin                     | <input type="checkbox"/> Ciprofloxacin         | <input type="checkbox"/> Norfloxacin                                            |
| <input type="checkbox"/> Amoxicillin                  | <input type="checkbox"/> Clarithromycin        | <input type="checkbox"/> Novobiocin                                             |
| <input type="checkbox"/> Amoxicillin + Clavulanate    | <input type="checkbox"/> Clindamycin           | <input type="checkbox"/> Ofloxacin                                              |
| <input type="checkbox"/> Ampicillin                   | <input type="checkbox"/> Cloxacillin           | <input type="checkbox"/> Oxacillin                                              |
| <input type="checkbox"/> Ampicillin + Sulbactam       | <input type="checkbox"/> Colistimethate        | <input type="checkbox"/> Oxytetracycline                                        |
| <input type="checkbox"/> Atovaquone                   | <input type="checkbox"/> Cycloserine           | <input type="checkbox"/> Penicillin                                             |
| <input type="checkbox"/> Azithromycin                 | <input type="checkbox"/> Daptomycin            | <input type="checkbox"/> Piperacillin                                           |
| <input type="checkbox"/> Aztreonam                    | <input type="checkbox"/> Demeclocycline        | <input type="checkbox"/> Piperacillin + Tazobactam                              |
| <input type="checkbox"/> Bacampicillin                | <input type="checkbox"/> Dicloxacillin         | <input type="checkbox"/> Podofilox                                              |
| <input type="checkbox"/> Bacitracin                   | <input type="checkbox"/> Dirithromycin         | <input type="checkbox"/> Polymyxin B                                            |
| <input type="checkbox"/> Capreomycin                  | <input type="checkbox"/> Doripenem             | <input type="checkbox"/> Quinupristin + Dalfopristin                            |
| <input type="checkbox"/> Carbenicillin sodium indanyl | <input type="checkbox"/> Doxycycline           | <input type="checkbox"/> Retapamulin                                            |
| <input type="checkbox"/> Cefaclor                     | <input type="checkbox"/> Enoxacin              | <input type="checkbox"/> Rifapentine                                            |
| <input type="checkbox"/> Cefadroxil                   | <input type="checkbox"/> Ertapenem             | <input type="checkbox"/> Rifaximin                                              |
| <input type="checkbox"/> Cefamandole                  | <input type="checkbox"/> Erythromycin          | <input type="checkbox"/> Saturated Solution of Potassium Iodide (SSKI)          |
| <input type="checkbox"/> Cefazolin                    | <input type="checkbox"/> Fosfomicin            | <input type="checkbox"/> Sparfloxacin                                           |
| <input type="checkbox"/> Cefdinir                     | <input type="checkbox"/> Gatifloxacin          | <input type="checkbox"/> Spectinomycin                                          |
| <input type="checkbox"/> Cefditoren                   | <input type="checkbox"/> Gemifloxacin          | <input type="checkbox"/> Streptomycin                                           |
| <input type="checkbox"/> Cefditoren                   | <input type="checkbox"/> Gentamicin            | <input type="checkbox"/> Sulfadiazine                                           |
| <input type="checkbox"/> Cefepime                     | <input type="checkbox"/> Grepafloxacin         | <input type="checkbox"/> Sulfamethoxazole                                       |
| <input type="checkbox"/> Cefixime                     | <input type="checkbox"/> Imipenem/Cilastatin   | <input type="checkbox"/> Sulfisoxazole                                          |
| <input type="checkbox"/> Cefmetazole                  | <input type="checkbox"/> Imiquimod             | <input type="checkbox"/> Sulphur, precipitated in petrolatum                    |
| <input type="checkbox"/> Cefonicid                    | <input type="checkbox"/> Kanamycin             | <input type="checkbox"/> TCA (trichloroacetic acid), BCA (bichloroacetic acid). |
| <input type="checkbox"/> Cefoperazone                 | <input type="checkbox"/> Levofloxacin          | <input type="checkbox"/> Teicoplanin                                            |
| <input type="checkbox"/> Cefotaxime                   | <input type="checkbox"/> Lincomycin            | <input type="checkbox"/> Telavancin                                             |
| <input type="checkbox"/> Cefotetan                    | <input type="checkbox"/> Linezolid             | <input type="checkbox"/> Telithromycin                                          |
| <input type="checkbox"/> Cefoxitin                    | <input type="checkbox"/> Lomefloxacin          | <input type="checkbox"/> Terbinafine                                            |
| <input type="checkbox"/> Cefpodoxime Proxetil         | <input type="checkbox"/> Loracarbef            | <input type="checkbox"/> Tetracycline                                           |
| <input type="checkbox"/> Cefprozil                    | <input type="checkbox"/> Mafenide              | <input type="checkbox"/> Ticarcillin                                            |
| <input type="checkbox"/> Ceftaroline                  | <input type="checkbox"/> Meropenem             | <input type="checkbox"/> Ticarcillin + Clavulanic Acid                          |
| <input type="checkbox"/> Ceftazidime                  | <input type="checkbox"/> Methenamine hippurate | <input type="checkbox"/> Tigecycline                                            |
| <input type="checkbox"/> Ceftributen                  | <input type="checkbox"/> Methicillin           | <input type="checkbox"/> Tobramycin                                             |
| <input type="checkbox"/> Ceftizoxime                  | <input type="checkbox"/> Metronidazole         | <input type="checkbox"/> Trimethoprim                                           |
| <input type="checkbox"/> Ceftobiprole                 | <input type="checkbox"/> Mezlocillin           | <input type="checkbox"/> Trimethoprim + Sulfamethoxazole                        |
| <input type="checkbox"/> Ceftriaxone                  | <input type="checkbox"/> Minocycline           | <input type="checkbox"/> Trovafloxacin                                          |
| <input type="checkbox"/> Cefuroxime                   | <input type="checkbox"/> Moxifloxacin          | <input type="checkbox"/> Vancomycin                                             |
| <input type="checkbox"/> Cephalixin                   | <input type="checkbox"/> Mupirocin             |                                                                                 |
| <input type="checkbox"/> Cephalothin                  | <input type="checkbox"/> Nafeillin             |                                                                                 |
| <input type="checkbox"/> Cephapirin                   | <input type="checkbox"/> Nalidixic Acid        |                                                                                 |
| <input type="checkbox"/> Cephadrine                   | <input type="checkbox"/> Neomycin              |                                                                                 |
| <input type="checkbox"/> Chloramphenicol              | <input type="checkbox"/> Netilmicin            |                                                                                 |
| <input type="checkbox"/> Cinoxacin                    | <input type="checkbox"/> Nitrofurantoin        |                                                                                 |
|                                                       | <input type="checkbox"/> Nitrofurazone         |                                                                                 |

**4.32 Haemoglobin IN THE LAST 24h**      g/dL \_\_\_\_\_

Not available

If this data has already been entered in the 'Daily Case Report Form – Laboratory Results' section of the ISARIC CRF, please DO NOT re-enter the data here. Please leave '4.32 Haemoglobin' blank.

**4.33 White Blood Cells IN THE LAST 24h**

Not available

If this data has already been entered in the 'Daily Case Report Form – Laboratory Results' section of the ISARIC CRF, please DO NOT re-enter the data here. Please leave '4.33 White Blood Cells' blank.

**4.34 White Blood Cells Unit**

- X 10<sup>9</sup>/L  
 X 10<sup>3</sup>/microL

**4.35 AST/SGOT IN THE LAST 24h**      U/L \_\_\_\_\_

Not available

If this data has already been entered in the 'Daily Case Report Form – Laboratory Results' section of the ISARIC CRF, please DO NOT re-enter the data here. Please leave '4.34 AST' blank.

**4.36 ALT/SGPT IN THE LAST 24h**      U/L \_\_\_\_\_

Not available

If this data has already been entered in the 'Daily Case Report Form – Laboratory Results' section of the ISARIC CRF, please DO NOT re-enter the data here. Please leave '4.36 ALT' blank.

**4.37 ANTICOAGULANTS IN THE LAST 24h**

- Yes  
 No

**4.38 TYPE OF ANTICOAGULANTS IN THE LAST 24h**

- Continuous infusion of unfractionated heparin  
 Subcutaneous unfractionated heparin only  
 Low molecular heparin  
 Danaparoid Lepirudin  
 Argatroban  
 Hirulog and bivalirudin  
 Desirudin  
 Nafamostat Mesilate  
 Other

**4.39 TRANSFUSED PACKED RED BLOOD CELL CONCENTRATE IN THE LAST 24 HOURS**

- Yes  
 No

**4.40 TRANSFUSED PLATELETS CONCENTRATE IN THE LAST 24 HOURS**

- Yes  
 No

#### 4.41 TRANSFUSED FRESH FROZEN PLASMA IN THE LAST 24 HOURS

- Yes  
 No

#### 4.42 TRANSFUSED CRYOPRECIPITATES IN THE LAST 24 HOURS

- Yes  
 No

#### 4.43 INFECTION COMPLICATION 1:

- Yes  
 No

#### 4.44 SOURCE OF INFECTIOUS COMPLICATION 1

- |                                               |                                                  |                                      |
|-----------------------------------------------|--------------------------------------------------|--------------------------------------|
| <input type="checkbox"/> Lungs                | <input type="checkbox"/> Central nervous system  | <input type="checkbox"/> Cardiac     |
| <input type="checkbox"/> Gastro-intestinal    | <input type="checkbox"/> Osteoarticular and bone | <input type="checkbox"/> Bloodstream |
| <input type="checkbox"/> Genito-urinary       |                                                  | <input type="checkbox"/> Not known   |
| <input type="checkbox"/> Skin and soft tissue |                                                  |                                      |

#### 4.45 CAUSATIVE PATHOGEN 1:

- |                                                            |                                                                     |                                                                          |
|------------------------------------------------------------|---------------------------------------------------------------------|--------------------------------------------------------------------------|
| <input type="checkbox"/> Acinetobacter baumannii           | <input type="checkbox"/> Clostridium tetani (Tetanus)               | <input type="checkbox"/> Lymphogranuloma venereum (LGV)                  |
| <input type="checkbox"/> Actinomyces                       | <input type="checkbox"/> Corynebacterium diphtheriae                | <input type="checkbox"/> Methicillin Resistant Staphylococcus aureus     |
| <input type="checkbox"/> Aeromonas                         | <input type="checkbox"/> Coxiella burnetii                          | <input type="checkbox"/> Moraxella catarrhalis                           |
| <input type="checkbox"/> Bacillus anthracis                | <input type="checkbox"/> Ehrlichia species                          | <input type="checkbox"/> Morganella                                      |
| <input type="checkbox"/> Bacillus species                  | <input type="checkbox"/> Eikenella corrodens                        | <input type="checkbox"/> Mycobacterium abscessus                         |
| <input type="checkbox"/> Bacteroides fragilis              | <input type="checkbox"/> Enterobacter species                       | <input type="checkbox"/> Mycobacterium avium-complex (MAC, MAI, non-HIV) |
| <input type="checkbox"/> Bacteroides species               | <input type="checkbox"/> Enterococcus                               | <input type="checkbox"/> Mycobacterium chelonae                          |
| <input type="checkbox"/> Bartonella species                | <input type="checkbox"/> Erysipelothrix rhusiopathiae               | <input type="checkbox"/> Mycobacterium fortuitum                         |
| <input type="checkbox"/> Bordetella species                | <input type="checkbox"/> Escherichia coli                           | <input type="checkbox"/> Mycobacterium gordonae                          |
| <input type="checkbox"/> Borrelia burgdorferi              | <input type="checkbox"/> Francisella tularensis                     | <input type="checkbox"/> Mycobacterium kansasii                          |
| <input type="checkbox"/> Borrelia species                  | <input type="checkbox"/> Haemophilus ducreyi (Chancroid)            | <input type="checkbox"/> Mycobacterium leprae                            |
| <input type="checkbox"/> Brucella Species                  | <input type="checkbox"/> Haemophilus influenzae                     | <input type="checkbox"/> Mycobacterium marinum                           |
| <input type="checkbox"/> Burkholderia cepacia              | <input type="checkbox"/> Helicobacter cinaedi and related species   | <input type="checkbox"/> Mycobacterium scrofulaceum                      |
| <input type="checkbox"/> Burkholderia mallei               | <input type="checkbox"/> Helicobacter pylori                        | <input type="checkbox"/> Mycobacterium tuberculosis                      |
| <input type="checkbox"/> Burkholderia pseudomallei         | <input type="checkbox"/> Klebsiella granulomatis (Antibiotic Guide) | <input type="checkbox"/> Mycobacterium ulcerans                          |
| <input type="checkbox"/> Campylobacter and related species | <input type="checkbox"/> Klebsiella species                         | <input type="checkbox"/> Mycobacterium xenopi                            |
| <input type="checkbox"/> Campylobacter jejuni              | <input type="checkbox"/> ESBL Klebsiella pneumoniae                 |                                                                          |
| <input type="checkbox"/> Capnocytophaga canimorsus         | <input type="checkbox"/> Lactobacillus                              |                                                                          |
| <input type="checkbox"/> Chlamydia trachomatis             | <input type="checkbox"/> Legionella pneumophila                     |                                                                          |
| <input type="checkbox"/> Chlamydia pneumoniae              | <input type="checkbox"/> Legionella species                         |                                                                          |
| <input type="checkbox"/> Chlamydia psittaci                | <input type="checkbox"/> Leptospira interrogans                     |                                                                          |
| <input type="checkbox"/> Citrobacter species               | <input type="checkbox"/> Listeria monocytogenes                     |                                                                          |
| <input type="checkbox"/> Clostridium botulinum             |                                                                     |                                                                          |
| <input type="checkbox"/> Clostridium difficile             |                                                                     |                                                                          |
| <input type="checkbox"/> Clostridium species               |                                                                     |                                                                          |

- |                                                                   |                                                                     |                                                  |
|-------------------------------------------------------------------|---------------------------------------------------------------------|--------------------------------------------------|
| <input type="checkbox"/> Mycoplasma pneumoniae (Antibiotic Guide) | <input type="checkbox"/> Staphylococcus aureus                      | <input type="checkbox"/> Candida albicans        |
| <input type="checkbox"/> Neisseria gonorrhoeae                    | <input type="checkbox"/> Stenotrophomonas maltophilia               | <input type="checkbox"/> Candida glabrata        |
| <input type="checkbox"/> Neisseria meningitidis                   | <input type="checkbox"/> Streptobacillus moniliformis               | <input type="checkbox"/> Candida guilliermondii  |
| <input type="checkbox"/> Nocardia                                 | <input type="checkbox"/> Streptococcus pneumoniae                   | <input type="checkbox"/> Candida krusei          |
| <input type="checkbox"/> Other atypical mycobacteria              | <input type="checkbox"/> Streptococcus pyogenes (Group A)           | <input type="checkbox"/> Candida lusitanae       |
| <input type="checkbox"/> Pasteurella multocida                    | <input type="checkbox"/> Streptococcus species                      | <input type="checkbox"/> Candida parapsilosis    |
| <input type="checkbox"/> Peptostreptococcus/Peptococcus           | <input type="checkbox"/> Treponema pallidum (syphilis)              | <input type="checkbox"/> Candida species         |
| <input type="checkbox"/> Plesiomonas                              | <input type="checkbox"/> Tropheryma whipplei                        | <input type="checkbox"/> Candida tropicalis      |
| <input type="checkbox"/> Propionibacterium species                | <input type="checkbox"/> Vancomycin Resistant Enterococcus species  | <input type="checkbox"/> Chromomycosis           |
| <input type="checkbox"/> Proteus species                          | <input type="checkbox"/> Vancomycin Resistant Staphylococcus aureus | <input type="checkbox"/> Coccidioides immitis    |
| <input type="checkbox"/> Providencia                              | <input type="checkbox"/> Vibrio cholerae                            | <input type="checkbox"/> Cryptococcus neoformans |
| <input type="checkbox"/> Pseudomonas aeruginosa                   | <input type="checkbox"/> Vibrio species (noncholera)                | <input type="checkbox"/> Cunninghamella          |
| <input type="checkbox"/> Rhodococcus equi                         | <input type="checkbox"/> Yersinia pestis                            | <input type="checkbox"/> Dermatophytes           |
| <input type="checkbox"/> Rickettsia rickettsii                    | <input type="checkbox"/> Yersinia species (non-plague)              | <input type="checkbox"/> Fusarium                |
| <input type="checkbox"/> Rickettsia species                       | <input type="checkbox"/> Absidia                                    | <input type="checkbox"/> Histoplasma capsulatum  |
| <input type="checkbox"/> Salmonella species                       | <input type="checkbox"/> Aspergillus                                | <input type="checkbox"/> Mucor                   |
| <input type="checkbox"/> Serratia species                         | <input type="checkbox"/> Basidiobolomycosis                         | <input type="checkbox"/> Mycetoma                |
| <input type="checkbox"/> Shigella dysenteriae                     | <input type="checkbox"/> Blastomyces dermatitidis                   | <input type="checkbox"/> Pneumocystis carinii    |
| <input type="checkbox"/> Shigella species                         |                                                                     | <input type="checkbox"/> Pneumocystis jirovecii  |
| <input type="checkbox"/> Staphylococci, coagulase negative        |                                                                     | <input type="checkbox"/> Pseudallescheria boydii |
|                                                                   |                                                                     | <input type="checkbox"/> Rhizomucor              |
|                                                                   |                                                                     | <input type="checkbox"/> Rhizopus                |
|                                                                   |                                                                     | <input type="checkbox"/> Saksanea                |
|                                                                   |                                                                     | <input type="checkbox"/> Sporothrix schenckii    |
|                                                                   |                                                                     | <input type="checkbox"/> Zygomycetes             |

**4.46 INFECTION COMPLICATION 2:**

- Yes  
 No

**4.47 SOURCE OF INFECTIOUS COMPLICATION 2:**

- |                                               |                                                  |                                      |
|-----------------------------------------------|--------------------------------------------------|--------------------------------------|
| <input type="checkbox"/> Lungs                | <input type="checkbox"/> Central nervous system  | <input type="checkbox"/> Cardiac     |
| <input type="checkbox"/> Gastro-intestinal    | <input type="checkbox"/> Osteoarticular and bone | <input type="checkbox"/> Bloodstream |
| <input type="checkbox"/> Genito-urinary       |                                                  | <input type="checkbox"/> Not known   |
| <input type="checkbox"/> Skin and soft tissue |                                                  |                                      |

**4.48 CAUSATIVE PATHOGEN 2:**

- |                                                  |                                                            |                                                       |
|--------------------------------------------------|------------------------------------------------------------|-------------------------------------------------------|
| <input type="checkbox"/> Acinetobacter baumannii | <input type="checkbox"/> Burkholderia mallei               | <input type="checkbox"/> Clostridium difficile        |
| <input type="checkbox"/> Actinomyces             | <input type="checkbox"/> Burkholderia pseudomallei         | <input type="checkbox"/> Clostridium species          |
| <input type="checkbox"/> Aeromonas               | <input type="checkbox"/> Campylobacter and related species | <input type="checkbox"/> Clostridium tetani (Tetanus) |
| <input type="checkbox"/> Bacillus anthracis      | <input type="checkbox"/> Campylobacter jejuni              | <input type="checkbox"/> Corynebacterium diphtheriae  |
| <input type="checkbox"/> Bacillus species        | <input type="checkbox"/> Capnocytophaga canimorsus         | <input type="checkbox"/> Coxiella burnetii            |
| <input type="checkbox"/> Bacteroides fragilis    | <input type="checkbox"/> Chlamydia trachomatis             | <input type="checkbox"/> Ehrlichia species            |
| <input type="checkbox"/> Bacteroides species     | <input type="checkbox"/> Chlamydophila pneumoniae          | <input type="checkbox"/> Eikenella corrodens          |
| <input type="checkbox"/> Bartonella species      | <input type="checkbox"/> Chlamydophila psittaci            | <input type="checkbox"/> Enterobacter species         |
| <input type="checkbox"/> Bordetella species      | <input type="checkbox"/> Citrobacter species               | <input type="checkbox"/> Enterococcus                 |
| <input type="checkbox"/> Borrelia burgdorferi    | <input type="checkbox"/> Clostridium botulinum             | <input type="checkbox"/> Erysipelothrix rhusiopathiae |
| <input type="checkbox"/> Borrelia species        |                                                            | <input type="checkbox"/> Escherichia coli             |
| <input type="checkbox"/> Brucella Species        |                                                            |                                                       |
| <input type="checkbox"/> Burkholderia cepacia    |                                                            |                                                       |

- |                                                                          |                                                                   |                                                                     |
|--------------------------------------------------------------------------|-------------------------------------------------------------------|---------------------------------------------------------------------|
| <input type="checkbox"/> Francisella tularensis                          | <input type="checkbox"/> Mycobacterium ulcerans                   | <input type="checkbox"/> Vancomycin Resistant Enterococcus species  |
| <input type="checkbox"/> Haemophilus ducreyi (Chancroid)                 | <input type="checkbox"/> Mycobacterium xenopi                     | <input type="checkbox"/> Vancomycin Resistant Staphylococcus aureus |
| <input type="checkbox"/> Haemophilus influenzae                          | <input type="checkbox"/> Mycoplasma pneumoniae (Antibiotic Guide) | <input type="checkbox"/> Vibrio cholerae                            |
| <input type="checkbox"/> Helicobacter cinaedi and related species        | <input type="checkbox"/> Neisseria gonorrhoeae                    | <input type="checkbox"/> Vibrio species (noncholera)                |
| <input type="checkbox"/> Helicobacter pylori                             | <input type="checkbox"/> Neisseria meningitidis                   | <input type="checkbox"/> Yersinia pestis                            |
| <input type="checkbox"/> Klebsiella granulomatis (Antibiotic Guide)      | <input type="checkbox"/> Nocardia                                 | <input type="checkbox"/> Yersinia species (non-plague)              |
| <input type="checkbox"/> Klebsiella species                              | <input type="checkbox"/> Other atypical mycobacteria              | <input type="checkbox"/> Absidia                                    |
| <input type="checkbox"/> ESBL Klebsiella pneumoniae                      | <input type="checkbox"/> Pasteurella multocida                    | <input type="checkbox"/> Aspergillus                                |
| <input type="checkbox"/> Lactobacillus                                   | <input type="checkbox"/> Peptostreptococcus/Peptococcus           | <input type="checkbox"/> Basidiobolomyces                           |
| <input type="checkbox"/> Legionella pneumophila                          | <input type="checkbox"/> Plesiomonas                              | <input type="checkbox"/> Blastomyces dermatitidis                   |
| <input type="checkbox"/> Legionella species                              | <input type="checkbox"/> Propionibacterium species                | <input type="checkbox"/> Candida albicans                           |
| <input type="checkbox"/> Leptospira interrogans                          | <input type="checkbox"/> Proteus species                          | <input type="checkbox"/> Candida glabrata                           |
| <input type="checkbox"/> Listeria monocytogenes                          | <input type="checkbox"/> Providencia                              | <input type="checkbox"/> Candida guilliermondii                     |
| <input type="checkbox"/> Lymphogranuloma venereum (LGV)                  | <input type="checkbox"/> Pseudomonas aeruginosa                   | <input type="checkbox"/> Candida krusei                             |
| <input type="checkbox"/> Methicillin Resistant Staphylococcus aureus     | <input type="checkbox"/> Rhodococcus equi                         | <input type="checkbox"/> Candida lusitanae                          |
| <input type="checkbox"/> Moraxella catarrhalis                           | <input type="checkbox"/> Rickettsia rickettsii                    | <input type="checkbox"/> Candida parapsilosis                       |
| <input type="checkbox"/> Morganella                                      | <input type="checkbox"/> Rickettsia species                       | <input type="checkbox"/> Candida species                            |
| <input type="checkbox"/> Mycobacterium abscessus                         | <input type="checkbox"/> Salmonella species                       | <input type="checkbox"/> Candida tropicalis                         |
| <input type="checkbox"/> Mycobacterium avium-complex (MAC, MAI, non-HIV) | <input type="checkbox"/> Serratia species                         | <input type="checkbox"/> Chromomycosis                              |
| <input type="checkbox"/> Mycobacterium chelonae                          | <input type="checkbox"/> Shigella dysenteriae                     | <input type="checkbox"/> Coccidioides immitis                       |
| <input type="checkbox"/> Mycobacterium fortuitum                         | <input type="checkbox"/> Shigella species                         | <input type="checkbox"/> Cryptococcus neoformans                    |
| <input type="checkbox"/> Mycobacterium gordonae                          | <input type="checkbox"/> Staphylococci, coagulase negative        | <input type="checkbox"/> Cunninghamella                             |
| <input type="checkbox"/> Mycobacterium kansasii                          | <input type="checkbox"/> Staphylococcus aureus                    | <input type="checkbox"/> Dermatophytes                              |
| <input type="checkbox"/> Mycobacterium leprae                            | <input type="checkbox"/> Stenotrophomonas maltophilia             | <input type="checkbox"/> Fusarium                                   |
| <input type="checkbox"/> Mycobacterium marinum                           | <input type="checkbox"/> Streptobacillus moniliformis             | <input type="checkbox"/> Histoplasma capsulatum                     |
| <input type="checkbox"/> Mycobacterium scrofulaceum                      | <input type="checkbox"/> Streptococcus pneumoniae                 | <input type="checkbox"/> Mucor                                      |
| <input type="checkbox"/> Mycobacterium tuberculosis                      | <input type="checkbox"/> Streptococcus pyogenes (Group A)         | <input type="checkbox"/> Mycetoma                                   |
|                                                                          | <input type="checkbox"/> Streptococcus species                    | <input type="checkbox"/> Pneumocystis carinii                       |
|                                                                          | <input type="checkbox"/> Treponema pallidum (syphilis)            | <input type="checkbox"/> Pneumocystis jirovecii                     |
|                                                                          | <input type="checkbox"/> Tropheryma whipplei                      | <input type="checkbox"/> Pseudallescheria boydii                    |
|                                                                          |                                                                   | <input type="checkbox"/> Rhizomucor                                 |
|                                                                          |                                                                   | <input type="checkbox"/> Rhizopus                                   |
|                                                                          |                                                                   | <input type="checkbox"/> Saksanea                                   |
|                                                                          |                                                                   | <input type="checkbox"/> Sporothrix schenckii                       |
|                                                                          |                                                                   | <input type="checkbox"/> Zygomycetes                                |

**4.49 INFECTION COMPLICATION 3:**

- Yes  
 No

**4.50 SOURCE OF INFECTIOUS COMPLICATION 3:**

- |                                               |                                                  |                                      |
|-----------------------------------------------|--------------------------------------------------|--------------------------------------|
| <input type="checkbox"/> Lungs                | <input type="checkbox"/> Central nervous system  | <input type="checkbox"/> Cardiac     |
| <input type="checkbox"/> Gastro-intestinal    | <input type="checkbox"/> Osteoarticular and bone | <input type="checkbox"/> Bloodstream |
| <input type="checkbox"/> Genito-urinary       |                                                  | <input type="checkbox"/> Not known   |
| <input type="checkbox"/> Skin and soft tissue |                                                  |                                      |

#### 4.51 CAUSATIVE PATHOGEN 3:

- |                                                                     |                                                                          |                                                                     |
|---------------------------------------------------------------------|--------------------------------------------------------------------------|---------------------------------------------------------------------|
| <input type="checkbox"/> Acinetobacter baumannii                    | <input type="checkbox"/> Legionella species                              | <input type="checkbox"/> Stenotrophomonas maltophilia               |
| <input type="checkbox"/> Actinomyces                                | <input type="checkbox"/> Leptospira interrogans                          | <input type="checkbox"/> Streptobacillus moniliformis               |
| <input type="checkbox"/> Aeromonas                                  | <input type="checkbox"/> Listeria monocytogenes                          | <input type="checkbox"/> Streptococcus pneumoniae                   |
| <input type="checkbox"/> Bacillus anthracis                         | <input type="checkbox"/> Lymphogranuloma venereum (LGV)                  | <input type="checkbox"/> Streptococcus pyogenes                     |
| <input type="checkbox"/> Bacillus species                           | <input type="checkbox"/> Methicillin Resistant Staphylococcus aureus     | <input type="checkbox"/> Streptococcus species                      |
| <input type="checkbox"/> Bacteroides fragilis                       | <input type="checkbox"/> Moraxella catarrhalis                           | <input type="checkbox"/> Treponema pallidum (syphilis)              |
| <input type="checkbox"/> Bacteroides species                        | <input type="checkbox"/> Morganella                                      | <input type="checkbox"/> Tropheryma whipplei                        |
| <input type="checkbox"/> Bartonella species                         | <input type="checkbox"/> Mycobacterium abscessus                         | <input type="checkbox"/> Vancomycin Resistant Enterococcus species  |
| <input type="checkbox"/> Bordetella species                         | <input type="checkbox"/> Mycobacterium avium-complex (MAC, MAI, non-HIV) | <input type="checkbox"/> Vancomycin Resistant Staphylococcus aureus |
| <input type="checkbox"/> Borrelia burgdorferi                       | <input type="checkbox"/> Mycobacterium chelonae                          | <input type="checkbox"/> Vibrio cholerae                            |
| <input type="checkbox"/> Borrelia species                           | <input type="checkbox"/> Mycobacterium fortuitum                         | <input type="checkbox"/> Vibrio species (noncholera)                |
| <input type="checkbox"/> Brucella Species                           | <input type="checkbox"/> Mycobacterium gordonae                          | <input type="checkbox"/> Yersinia pestis                            |
| <input type="checkbox"/> Burkholderia cepacia                       | <input type="checkbox"/> Mycobacterium kansasii                          | <input type="checkbox"/> Yersinia species (non-plague)              |
| <input type="checkbox"/> Burkholderia mallei                        | <input type="checkbox"/> Mycobacterium leprae                            | <input type="checkbox"/> Absidia                                    |
| <input type="checkbox"/> Burkholderia pseudomallei                  | <input type="checkbox"/> Mycobacterium marinum                           | <input type="checkbox"/> Aspergillus                                |
| <input type="checkbox"/> Campylobacter and related species          | <input type="checkbox"/> Mycobacterium scrofulaceum                      | <input type="checkbox"/> Basidiobolomyces                           |
| <input type="checkbox"/> Campylobacter jejuni                       | <input type="checkbox"/> Mycobacterium tuberculosis                      | <input type="checkbox"/> Blastomyces dermatitidis                   |
| <input type="checkbox"/> Capnocytophaga canimorsus                  | <input type="checkbox"/> Mycobacterium ulcerans                          | <input type="checkbox"/> Candida albicans                           |
| <input type="checkbox"/> Chlamydia trachomatis                      | <input type="checkbox"/> Mycobacterium xenopi                            | <input type="checkbox"/> Candida glabrata                           |
| <input type="checkbox"/> Chlamydia pneumoniae                       | <input type="checkbox"/> Mycoplasma pneumoniae (Antibiotic Guide)        | <input type="checkbox"/> Candida guilliermondii                     |
| <input type="checkbox"/> Chlamydia psittaci                         | <input type="checkbox"/> Neisseria gonorrhoeae                           | <input type="checkbox"/> Candida krusei                             |
| <input type="checkbox"/> Citrobacter species                        | <input type="checkbox"/> Neisseria meningitidis                          | <input type="checkbox"/> Candida lusitanae                          |
| <input type="checkbox"/> Clostridium botulinum                      | <input type="checkbox"/> Nocardia                                        | <input type="checkbox"/> Candida parapsilosis                       |
| <input type="checkbox"/> Clostridium difficile                      | <input type="checkbox"/> Other atypical mycobacteria                     | <input type="checkbox"/> Candida species                            |
| <input type="checkbox"/> Clostridium species                        | <input type="checkbox"/> Pasteurella multocida                           | <input type="checkbox"/> Candida tropicalis                         |
| <input type="checkbox"/> Clostridium tetani (Tetanus)               | <input type="checkbox"/> Peptostreptococcus/Peptococcus                  | <input type="checkbox"/> Chromomycosis                              |
| <input type="checkbox"/> Corynebacterium diphtheriae                | <input type="checkbox"/> Plesiomonas                                     | <input type="checkbox"/> Coccidioides immitis                       |
| <input type="checkbox"/> Coxiella burnetii                          | <input type="checkbox"/> Propionibacterium species                       | <input type="checkbox"/> Cryptococcus neoformans                    |
| <input type="checkbox"/> Ehrlichia species                          | <input type="checkbox"/> Proteus species                                 | <input type="checkbox"/> Cunninghamella                             |
| <input type="checkbox"/> Eikenella corrodens                        | <input type="checkbox"/> Providencia                                     | <input type="checkbox"/> Dermatophytes                              |
| <input type="checkbox"/> Enterobacter species                       | <input type="checkbox"/> Pseudomonas aeruginosa                          | <input type="checkbox"/> Fusarium                                   |
| <input type="checkbox"/> Enterococcus                               | <input type="checkbox"/> Rhodococcus equi                                | <input type="checkbox"/> Histoplasma capsulatum                     |
| <input type="checkbox"/> Erysipelothrix rhusiopathiae               | <input type="checkbox"/> Rickettsia rickettsii                           | <input type="checkbox"/> Mucor                                      |
| <input type="checkbox"/> Escherichia coli                           | <input type="checkbox"/> Rickettsia species                              | <input type="checkbox"/> Mycetoma                                   |
| <input type="checkbox"/> Francisella tularensis                     | <input type="checkbox"/> Salmonella species                              | <input type="checkbox"/> Pneumocystis carinii                       |
| <input type="checkbox"/> Haemophilus ducreyi (Chancroid)            | <input type="checkbox"/> Serratia species                                | <input type="checkbox"/> Pneumocystis jirovecii                     |
| <input type="checkbox"/> Haemophilus influenzae                     | <input type="checkbox"/> Shigella dysenteriae                            | <input type="checkbox"/> Pseudallescheria boydii                    |
| <input type="checkbox"/> Helicobacter cinaedi and related species   | <input type="checkbox"/> Shigella species                                | <input type="checkbox"/> Rhizomucor                                 |
| <input type="checkbox"/> Helicobacter pylori                        | <input type="checkbox"/> Staphylococci, coagulase negative               | <input type="checkbox"/> Rhizopus                                   |
| <input type="checkbox"/> Klebsiella granulomatis (Antibiotic Guide) | <input type="checkbox"/> Staphylococcus aureus                           | <input type="checkbox"/> Saksanea                                   |
| <input type="checkbox"/> Klebsiella species                         |                                                                          | <input type="checkbox"/> Sporothrix schenckii                       |
| <input type="checkbox"/> ESBL Klebsiella pneumoniae                 |                                                                          | <input type="checkbox"/> Zygomycetes                                |
| <input type="checkbox"/> Lactobacillus                              |                                                                          |                                                                     |
| <input type="checkbox"/> Legionella pneumophila                     |                                                                          |                                                                     |



**4.52 HAEMORRHAGIC COMPLICATION 1:**

- Yes
- No

**4.53 SOURCE OF HAEMORRHAGIC COMPLICATION 1:**

- |                                               |                                                  |                                    |
|-----------------------------------------------|--------------------------------------------------|------------------------------------|
| <input type="checkbox"/> Lungs                | <input type="checkbox"/> Central nervous system  | <input type="checkbox"/> Not known |
| <input type="checkbox"/> Gastro-intestinal    | <input type="checkbox"/> Osteoarticular and bone |                                    |
| <input type="checkbox"/> Genito-urinary       | <input type="checkbox"/> Cardiac                 |                                    |
| <input type="checkbox"/> Skin and soft tissue | <input type="checkbox"/> Bloodstream             |                                    |

**4.54 HAEMORRHAGIC COMPLICATION 2:**

- Yes
- No

**4.55 SOURCE OF HAEMORRHAGIC COMPLICATION 2:**

- |                                            |                                                  |                                      |
|--------------------------------------------|--------------------------------------------------|--------------------------------------|
| <input type="checkbox"/> Lungs             | <input type="checkbox"/> Skin and soft tissue    | <input type="checkbox"/> Cardiac     |
| <input type="checkbox"/> Gastro-intestinal | <input type="checkbox"/> Central nervous system  | <input type="checkbox"/> Bloodstream |
| <input type="checkbox"/> Genito-urinary    | <input type="checkbox"/> Osteoarticular and bone | <input type="checkbox"/> Not known   |

**4.56 OTHER NON-HAEMORRHAGIC COMPLICATION (Please describe):**

\_\_\_\_\_ (TEXT)

**4.57 Ferritin in the last 24 hours:** \_\_\_\_\_ (ng/mL)

Only numbers from 0-1000

- Not available

If this data has already been entered in the 'Daily Case Report Form – Laboratory Results' section of the ISARIC CRF, please DO NOT re-enter the data here. Please leave '4.57 Ferritin' blank.

**4.58 D-dimer in the last 24 hours:**

\_\_\_\_\_ (ng/mL or mcg/mL)

Only numbers from 0-15000

- Not available

If this data has already been entered in the 'Daily Case Report Form – Laboratory Results' section of the ISARIC CRF, please DO NOT re-enter the data here. Please leave '4.58 D-dimer' blank.

**4.59 Troponin in the last 24 hours:**

- Troponin T: \_\_\_\_\_ (ng/mL or ng/L)
- Troponin I: \_\_\_\_\_ (ng/mL or ng/L)

If this data has already been entered in the 'Daily Case Report Form – Laboratory Results' section of the ISARIC CRF, please DO NOT re-enter the data here. Please leave '4.59 Troponin I' blank.

- High sensitivity troponin T: \_\_\_\_\_ (ng/mL or ng/L)
- High sensitivity troponin I: \_\_\_\_\_ (ng/mL or ng/L)
- Not available

**4.60 Cardiac BNP in the last 24 hours:**

\_\_\_\_\_ (picograms/mL)

Only numbers between 0-1000

- Not available

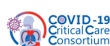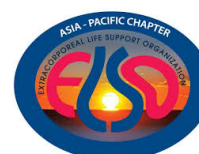



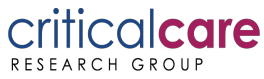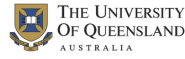

CONFIDENTIAL

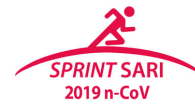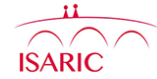

1  
2  
3  
4  
5  
6  
7  
8  
9  
10  
11  
12  
13  
14  
15  
16  
17  
18  
19  
20  
21  
22  
23  
24  
25  
26  
27  
28  
29  
30  
31  
32  
33  
34  
35  
36  
37  
38  
39  
40  
41  
42  
43  
44  
45  
46  
47  
48  
49  
50  
51  
52  
53  
54  
55  
56  
57  
58  
59  
60

For peer review only

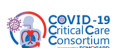

Version 1.2.7  
8 May 2020

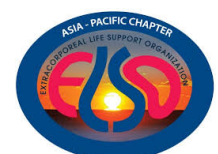

## CORE CASE RECORD FORM (EOT Final)

### 5 OUTCOMES

**5.1 DATE OF ECMO DISCONTINUATION:** \_\_\_\_ / \_\_\_\_ / \_\_\_\_ (ONLY DATE, FROM 14/12/2019)

**5.2 DATE OF INVASIVE MECHANICAL VENTILATION DISCONTINUATION:** \_\_\_\_ / \_\_\_\_ / \_\_\_\_ (ONLY DATE, FROM 14/12/2019)

**5.3 DATE OF ICU DISCHARGE:** \_\_\_\_ / \_\_\_\_ / \_\_\_\_ (ONLY DATE, FROM 01/01/2019)

**5.4 DATE OF HOSPITAL DISCHARGE:** \_\_\_\_ / \_\_\_\_ / \_\_\_\_ (ONLY DATE, FROM 01/01/2019)

**5.5 DATE OF DEATH:** \_\_\_\_ / \_\_\_\_ / \_\_\_\_ (ONLY DATE, FROM 01/01/2019)

Not applicable

#### 5.6 SITE OF DEATH

ICU

HOSPITAL

OUTSIDE HOSPITAL

Not applicable

#### 5.7 MAIN CAUSE OF ICU DEATH

Respiratory Failure

Cardiac Failure

Liver Failure

Cardio-vascular accident

Septic shock

Haemorrhagic shock

Other

Not applicable

#### 5.8 ALIVE AT 28 DAYS POST ICU ADMISSION?

Yes

No

#### 5.9 FINAL ASSESSMENT NOTES

TEXT)

**5.10 At any time post ICU admission and until ICU discharge, did the patient present new cutaneous manifestations?**

Yes

No

Not available

**If yes to 5.10, type of cutaneous manifestations (please select up to three (3) options)**

Bullae

- Macules
- Nodules
- Papules
- Plaques
- Purpura
- Pustules
- Rash
- Scale
- Urticaria
- Vesicles
- Other: \_\_\_\_\_

**If yes to 5.10, specify the involved regions (please select up to three (3) options):**

- Face
- Truck
- Upper limbs
- Hands
- Lower limbs
- Feet

For peer review only

# BMJ Open

## Design and rationale of the COVID-19 Critical Care Consortium, international, multicenter, observational study: A study protocol

|                                 |                                                                                                                                                                                                                                                                                                                                                                                                                                                                                                                                                                                                                                                                                                                                                                                                                                                                                                                                                                                                                                                                                                             |
|---------------------------------|-------------------------------------------------------------------------------------------------------------------------------------------------------------------------------------------------------------------------------------------------------------------------------------------------------------------------------------------------------------------------------------------------------------------------------------------------------------------------------------------------------------------------------------------------------------------------------------------------------------------------------------------------------------------------------------------------------------------------------------------------------------------------------------------------------------------------------------------------------------------------------------------------------------------------------------------------------------------------------------------------------------------------------------------------------------------------------------------------------------|
| Journal:                        | <i>BMJ Open</i>                                                                                                                                                                                                                                                                                                                                                                                                                                                                                                                                                                                                                                                                                                                                                                                                                                                                                                                                                                                                                                                                                             |
| Manuscript ID                   | bmjopen-2020-041417.R1                                                                                                                                                                                                                                                                                                                                                                                                                                                                                                                                                                                                                                                                                                                                                                                                                                                                                                                                                                                                                                                                                      |
| Article Type:                   | Protocol                                                                                                                                                                                                                                                                                                                                                                                                                                                                                                                                                                                                                                                                                                                                                                                                                                                                                                                                                                                                                                                                                                    |
| Date Submitted by the Author:   | 02-Nov-2020                                                                                                                                                                                                                                                                                                                                                                                                                                                                                                                                                                                                                                                                                                                                                                                                                                                                                                                                                                                                                                                                                                 |
| Complete List of Authors:       | Li Bassi, Gianluigi; Prince Charles Hospital, Critical Care Research Group<br>Suen, Jacky; Prince Charles Hospital, Critical Care Research Group<br>Barnett, Adrian; Queensland University of Technology, Institute of Health and Biomedical Innovation<br>Corley, Amanda; University of Queensland<br>Millar, Jonathan ; The University of Edinburgh The Roslin Institute<br>Fanning, Jonathon; Prince Charles Hospital, Critical Care Research Group<br>Lye, India; Prince Charles Hospital, Critical Care Research Group<br>Colombo, Sebastiano; Prince Charles Hospital, Critical Care Research Group<br>Wildi, Karin; Prince Charles Hospital, Critical Care Research Group<br>Livingstone, Samantha; Prince Charles Hospital, Critical Care Research Group<br>Abbate, Gabriella; Prince Charles Hospital, Critical Care Research Group<br>Hinton, Samuel; University of Queensland<br>Liquet, Benoit; University of Queensland<br>Shrapnel, Sally; University of Queensland<br>Dalton, Heidi; Inova Fairfax Medical Campus<br>Fraser, John; The Prince Charles Hospital, Critical Care Research Group |
| <b>Primary Subject Heading</b>: | Intensive care                                                                                                                                                                                                                                                                                                                                                                                                                                                                                                                                                                                                                                                                                                                                                                                                                                                                                                                                                                                                                                                                                              |
| Secondary Subject Heading:      | Infectious diseases                                                                                                                                                                                                                                                                                                                                                                                                                                                                                                                                                                                                                                                                                                                                                                                                                                                                                                                                                                                                                                                                                         |
| Keywords:                       | INTENSIVE & CRITICAL CARE, Respiratory infections < THORACIC MEDICINE, EPIDEMIOLOGY, Public health < INFECTIOUS DISEASES, Epidemiology < INFECTIOUS DISEASES                                                                                                                                                                                                                                                                                                                                                                                                                                                                                                                                                                                                                                                                                                                                                                                                                                                                                                                                                |
|                                 |                                                                                                                                                                                                                                                                                                                                                                                                                                                                                                                                                                                                                                                                                                                                                                                                                                                                                                                                                                                                                                                                                                             |

SCHOLARONE™  
Manuscripts

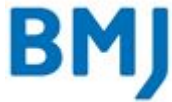

I, the Submitting Author has the right to grant and does grant on behalf of all authors of the Work (as defined in the below author licence), an exclusive licence and/or a non-exclusive licence for contributions from authors who are: i) UK Crown employees; ii) where BMJ has agreed a CC-BY licence shall apply, and/or iii) in accordance with the terms applicable for US Federal Government officers or employees acting as part of their official duties; on a worldwide, perpetual, irrevocable, royalty-free basis to BMJ Publishing Group Ltd ("BMJ") its licensees and where the relevant Journal is co-owned by BMJ to the co-owners of the Journal, to publish the Work in this journal and any other BMJ products and to exploit all rights, as set out in our [licence](#).

The Submitting Author accepts and understands that any supply made under these terms is made by BMJ to the Submitting Author unless you are acting as an employee on behalf of your employer or a postgraduate student of an affiliated institution which is paying any applicable article publishing charge ("APC") for Open Access articles. Where the Submitting Author wishes to make the Work available on an Open Access basis (and intends to pay the relevant APC), the terms of reuse of such Open Access shall be governed by a Creative Commons licence – details of these licences and which [Creative Commons](#) licence will apply to this Work are set out in our licence referred to above.

Other than as permitted in any relevant BMJ Author's Self Archiving Policies, I confirm this Work has not been accepted for publication elsewhere, is not being considered for publication elsewhere and does not duplicate material already published. I confirm all authors consent to publication of this Work and authorise the granting of this licence.

# Design and rationale of the COVID-19 Critical Care Consortium, international, multicenter, observational study: A study protocol

**Short Title:** COVID-19 CCC observational study protocol

Gianluigi Li Bassi MD, PhD<sup>1,2,3,4\*</sup>; Jacky Y. Suen BSc, PhD<sup>1,2\*</sup>; Adrian G. Barnett BSc, PhD<sup>3</sup>; Amanda Corley, RN<sup>1,2</sup>; Jonathan E. Millar MBBS<sup>5,6</sup>; Jonathon P. Fanning BSc, MBBS, PhD, FANZCA<sup>1,2,7</sup>; India Lye, RN<sup>1,2</sup>; Sebastiano Colombo, MD<sup>1,2,8</sup>; Karin Wildi, MD<sup>1,2</sup>; Samantha Livingstone, DVM<sup>1,2</sup>; Gabriella Abbate, RN, MSc<sup>1,2</sup>; Samuel Hinton, PhD<sup>2</sup>; Benoit Liquet, PhD<sup>2,3,9</sup>; Sally Shrapnel MBBS, BMedSc, MSc, PhD, FRACGP<sup>2</sup>; Heidi J. Dalton MD, MCCM<sup>10</sup>; and, John F. Fraser MBChB, PhD, FRCP(Glas), FFARCSI, FRCA, FCICM<sup>1,2,3,7</sup>

On behalf of the COVID-19 Critical Care Consortium Investigators

## Affiliations

1. Critical Care Research Group, The Prince Charles Hospital, Brisbane, Australia
2. University of Queensland, Brisbane, Australia
3. Queensland University of Technology, Brisbane, Australia
4. Institut d'Investigacions Biomèdiques August Pi i Sunyer, Barcelona, Spain
5. Roslin Institute, University of Edinburgh, United Kingdom
6. Queen Elizabeth II University Hospital, Glasgow, United Kingdom
7. UnitingCare Health, Australia
8. Department of Pathophysiology and Transplantation, University of Milan, Italy
9. University of Pau et Pays De L'Adour, LMAP, E2S-UPPA, CNRS, Pau, France
10. INOVA Fairfax Medical Center, Heart and Vascular Institute, Falls Church VA, USA

\* GLB and JS equally contributed to this work

**Corresponding author:**

A/Prof. Gianluigi LiBassi

Critical Care Research Group

The Prince Charles Hospital, Clinical Sciences, Level 3

Rode Road

4032 Chermside, Brisbane, QLD

Australia

Phone: +61 421273217

E-mail: [g.libassi@uq.edu.au](mailto:g.libassi@uq.edu.au)



## ABSTRACT

**Introduction:** There is a paucity of data that can be used to guide the management of critically ill patients with coronavirus disease-2019 (COVID-19). In response, a research and data-sharing collaborative – The COVID-19 Critical Care Consortium – has been assembled to harness the cumulative experience of intensive care units (ICUs) worldwide. The resulting observational study provides a platform to rapidly disseminate detailed data and insights crucial to improving outcomes.

**Methods and analysis:** This is an international, multicenter observational study of patients with confirmed or suspected SARS-CoV-2 infection admitted to ICUs. This is an evolving, open-ended study that commenced on January 1<sup>st</sup>, 2020 and currently includes more than 350 sites in over 48 countries. The study enrolls patients at the time of ICU admission and follows them to the time of death, hospital discharge, or 28 days post-ICU admission, whichever occurs last. Key data, collected via an electronic case report form devised in collaboration with the ISARIC/SPRINT-SARI networks, include: patient demographic data and risk factors, clinical features, severity of illness and respiratory failure, need for non-invasive and/or mechanical ventilation and/or extracorporeal membrane oxygenation (ECMO), and associated complications, as well as data on adjunctive therapies.

**Ethics and dissemination:** Local principal investigators will ensure that the study adheres to all relevant national regulations, and that the necessary approvals are in place before a site may contribute data. In jurisdictions where a waiver of consent is deemed insufficient, prospective, representative or retrospective consent will be obtained, as appropriate. A web-based dashboard has been developed to provide relevant data and descriptive statistics to international collaborators in real-time. It is anticipated that, following study completion, all de-identified data will be made open access.

**Clinical Trial Registration:** ACTRN12620000421932. Available from:  
<http://anzctr.org.au/ACTRN12620000421932.aspx>.

## STRENGTHS AND LIMITATIONS

- This protocol is of a pragmatic international, multicenter, observational clinical study of patients with confirmed or suspected SARS-CoV-2 infection admitted to ICUs around the world.
- This is an evolving clinical registry, which will facilitate the characterization of patients and their management and provide real-time information on associated characteristics and outcomes.
- These data will assist clinicians in deriving evidence-based practices for the care of critically ill patients infected by SARS-CoV-2.
- Patients will not receive identical treatments and care. While this will limit some aspects of data analysis, it will also give breadth to the scope of the investigation, as data on laboratory and patient characteristics, interventions and adjunct therapies, and outcomes will be available.
- This study relies on clinicians and support staff to accurately record data during a time of increased patient influx and ICU workload, raising concerns over data input error and completeness.

## INTRODUCTION

The world is currently witnessing a viral pandemic. Cases of atypical pneumonia first emerged in Wuhan, China, in December 2019. [1] Investigation has identified the cause as a novel betacoronavirus, ultimately named severe acute respiratory syndrome coronavirus-2 (SARS-CoV-2). [2] The virus, and the disease it causes – COVID-19 – has since spread internationally. The World Health Organization declared the outbreak a “Public Health Emergency of International Concern” on the 30<sup>th</sup> of January, 2020, and a “pandemic” on the 12<sup>th</sup> of March. There have now been more than 39 million confirmed infections globally, resulting in 1.1 million deaths (as of the 17<sup>th</sup> of October, 2020). [3]

### SARS-CoV-2, COVID-19, and critical illness

The mortality rate of COVID-19 among patients admitted to the intensive care unit (ICU) has been reported around 30% [4] and substantially higher for mechanically ventilated patients [5–9] Early data and clinical experience indicate that this is caused primarily by acute hypoxemic respiratory failure (AHRF). [10,11] These same data have also prompted some authors to suggest that the pathobiology of COVID-19 – associated AHRF may differ from that of Acute Respiratory Distress Syndrome (ARDS). [12,13] This assertion hinges on reports of patients with severe COVID-19 associated AHRF and high pulmonary compliance, a presentation not thought to be typical of ARDS. Much has also been made of the high incidence of thromboembolic events in critically ill patients. [14,15] However, many reports are limited by either small numbers of patients or by geographic restrictions. These fail to account for variations in practices or for the variations between countries in patient, systemic, and organizational factors. Consequently, much of our current practice is driven by anecdotal cases or by limited case series.

### Rationale for developing a worldwide registry of COVID-19 patients admitted to ICUs

We aim to improve conclusions robustness regarding the management, interventions and treatment of critically-ill COVID-19 patients around the world. We aim to do this by utilizing combined data sets which detail a wide variety of patients entering the ICU at multiple stages of COVID-19 illness from diverse geographic locations. This ongoing research effort will aid in developing best practices based on evidence from a wide variety of ICUs throughout the world. This is especially important as there is currently a paucity of evidence-based guidelines and limited clinical resources globally. This data will also aid decision-making of clinicians working in healthcare systems that are currently managing or yet to face a surge in COVID-19 cases.

## **METHODS AND ANALYSIS**

### **Study design**

This is an international, multicenter, prospective, observational study. The study protocol v. 1.2.8 appears in [Supplement 1].

### **Study eligibility**

The inclusion criteria are: (1) clinically suspected (as determined by attending physician) or laboratory-confirmed SARS-CoV-2 infection (by real time PCR and/or next generation sequencing), and (2) admission to an ICU. Patients admitted to an ICU for a reason other than SARS-CoV-2 infection are excluded. In addition, patients who were recently diagnosed with SARS-CoV-2 infection and later admitted to the ICU for reasons not related to the SARS-CoV-2 infection will be excluded. Patients of all ages from infants through adults can be enrolled into the study.

### **Enrolment and participating sites**

This study commenced on January 1<sup>st</sup>, 2020. There is no fixed end date for the study. Currently, 350 centers are included, spanning 48 countries [Supplement 2], coordinated by regional leads and assistants [Supplement 3] and the operating team at the coordinating site [Supplement 3]. Co-enrolment with other studies, including interventional trials, is permitted.

### **Outcome measures**

A summary of variables recorded by the study case report form (CRF) is presented in Table 1.

### **Data collection**

#### *Data collection methods*

Streamlined data-collection instruments and procedures are used to minimize the workload at study centers. Data can be collected and entered prospectively (preferred) or retrospectively dependent on the participating site's resources. Data collection begins at the time of hospital admission using the International Severe Acute Respiratory and Emerging Infection Consortium (ISARIC) and Short Period Incidence Study of Severe Acute Respiratory Illness (SPRINT-SARI) data tools (<https://isaric.tghn.org/COVID-19-CRF/>). Data collection for the COVID-19 CCC observational study commences at the time of a patient's admission to an ICU, using a study specific adaptation of the ISARIC/SPRINT-SARI COVID-19 CRF [Supplement 4]. Figure 1 outlines the schedule of assessments used for patients included in the COVID-19 CCC study. De-identified study data are collected and managed using the REDCap electronic data capture tool hosted at the University of Oxford, United Kingdom. [16] Data will not be used for any purpose other than those described in the study protocol. Each site's principal investigator is responsible for ensuring data integrity. Regular written and web-based training is provided. In countries unable to upload data into a centralized database, the ability

1  
2  
3 to retain a local database on a national server is available, with aggregated anonymized data  
4  
5 exported centrally for analysis.  
6  
7

### 8 9 *Inter-hospital transfer*

10  
11  
12 If a patient is transferred from a facility participating in the COVID-19 CCC and  
13  
14 ISARIC/SPRINT-SARI to another participating center, the patient's previously allocated  
15  
16 unique identifier transfers with them. However, sites will not have access to study data  
17  
18 collected outside their hospital. It is the responsibility of each hospital to enter data pertaining  
19  
20 to their component of the patient's hospital admission. If a patient is transferred to a non-  
21  
22 participating hospital, there will be no further data collection. All sites will be asked to include  
23  
24 a COVID-19 CCC and ISARIC/SPRINT-SARI study information sheet in any outgoing  
25  
26 patient's documentation.  
27  
28  
29

### 30 31 *Data management*

32  
33  
34 Several procedures are in place to optimize data quality and completeness. These include: (1)  
35  
36 a detailed data dictionary, (2) quality assurance within the data management system, (3) quality  
37  
38 assurance of key variables within the CRF, and (4) regular written and web-based training for  
39  
40 local study investigators. A compendious CRF is fundamental to the success of this study.  
41  
42 Extensive efforts have been made to limit data collection to essential variables. It is hoped that  
43  
44 this will contribute to more complete data entry with a reduced burden on participating centers.  
45  
46 Information that is not available to the investigator will not be treated as missing, and no  
47  
48 assumptions will be made for missing data. An audit will be conducted on a randomly selected  
49  
50 sample (approximately 5%) of cases. In-person site visits will not be feasible, given the nature  
51  
52 of the study and pandemic. Sub-study projects will be accessed via the main CRF platform.  
53  
54 Specific extensions will be used to collect additional variables, limiting the overall burden on  
55  
56  
57  
58  
59  
60

1  
2  
3 data collectors, but allowing centers involved in sub-studies to enter data in the single REDCap  
4  
5 format.  
6  
7

### 8 9 *Data access*

10  
11 The coordinating team will have access to all collected data to assure integrity, provide  
12 oversight, and conduct the main study analyses. Individual sites will have access to all the data  
13 they collect. A multinational steering committee [Supplement 1] oversees registry operations  
14 worldwide and approves investigator-initiated or site-specific sub-studies, external requests for  
15 data, and reviews suggestions by participants. To date, several sub-studies have been initiated  
16 focusing on the impact of COVID-19 on the brain, heart, kidneys, management and risks of  
17 ECMO, coagulation and thrombosis risks and long-term effects, all involving multi-center  
18 participation. Once approval is obtained, relevant de-identified data will be made available. It  
19 is anticipated that, following study completion, all de-identified data will be made open access.  
20  
21  
22  
23  
24  
25  
26  
27  
28  
29  
30  
31  
32

### 33 34 **Statistical considerations**

35  
36 Initial characterization will be descriptive, including all eligible patients at participating centers  
37 enrolled within defined timeframes. Where analysis is hypothesis-driven, sample size  
38 calculations and power analysis (where appropriate) will depend on the specific outcome or  
39 endpoint under consideration and will be pre-defined. Results that aim to show an association  
40 or test a hypothesis will include 95% confidence intervals. These intervals and associated  
41 means will be interpreted in terms of their clinical and statistical significance, and discussion  
42 may include whether a comparison is under-powered.  
43  
44  
45  
46  
47  
48  
49  
50  
51  
52

53  
54 For discharge, mortality, and length-of-stay outcomes, we will use a survival analysis with  
55 competing risks approach. [17] We will graphically depict the risks of death and discharge over  
56 time using cumulative incidence plots. We will estimate which patient variables influence the  
57  
58  
59  
60



1  
2  
3 risk of death and discharge using Cox regression, with separate models for death and discharge.  
4  
5 In addition to Cox models, we will construct non-linear predictive models for both outcomes  
6  
7 using Random Forest models, which will be externally validated on a hold-out test set.  
8  
9 Comparison of the predictive performance of both the Cox regression and Random Forest  
10  
11 modelling approaches will be made using: (1) a Brier score, [18] (2) area under the receiver  
12  
13 operating characteristic (ROC) curves using a 2-sided DeLong test, and (3) calibration plots,  
14  
15 characterized by visual inspection and reporting of slope and intercept. [18] For the Random  
16  
17 Forest models, a Shapley Tree Explainer will be used to identify variables that are highly  
18  
19 predictive of each outcome. [19] This analysis will follow the Transparent Reporting of a  
20  
21 Multivariable Prediction Model for Individual Prognosis or Diagnosis (TRIPOD) reporting  
22  
23 guideline for prediction model development and validation. [20]  
24  
25  
26  
27  
28

29 To show within-patient trends, we will plot continuous longitudinal variables over time using  
30  
31 line plots. We will summarize each trend using daily averages and will estimate trends over  
32  
33 time and the influence of patient variables using a linear mixed model with a random intercept  
34  
35 per patient to control for repeated data. For binary variables, we will use panel bar charts to  
36  
37 show the average change over time, and will model these variables using a generalized linear  
38  
39 mixed model with a binomial distribution. A smooth estimation using cubic spline will be  
40  
41 explored to estimate potential non-linear trends of the continuous longitudinal variables and  
42  
43 binary variables.  
44  
45  
46  
47  
48

### 49 **Patient and public involvement in research**

50  
51  
52 The data collection methodology of this study has been designed without patient or public input  
53  
54 due to the urgent need for inclusion of prospective data from critically ill COVID-19. However,  
55  
56 a consultative approach is planned via structured interviews, workshops and surveys to develop  
57  
58  
59  
60

1  
2  
3 research questions, refine methods and ensure public voice helps to shape consumer focused  
4  
5 outcomes.  
6  
7

## 8 9 **ETHICS AND DISSEMINATION**

### 10 11 **Ethical considerations**

12  
13  
14  
15 Chief investigators and the study management team are responsible for ensuring that the study  
16  
17 is conducted in accordance with both the protocol, Declaration of Helsinki and the Principles  
18  
19 of Good Clinical Practice. The study management team will continue to work with local  
20  
21 principal investigators to ensure that the study adheres to all relevant national regulations, and  
22  
23 that the necessary approvals are in place before a site may contribute data. The principal  
24  
25 investigator at each site is responsible for maintaining a securely-held enrolment log, linking  
26  
27 each patient's hospital record number with the COVID-19 CCC study number, if required. The  
28  
29 original protocol and subsequent amendments will be translated into the main language of the  
30  
31 collaborating institutions and submitted for institutional review board approval or an  
32  
33 equivalent. Patients will not be enrolled under the conditions of an amended protocol, until  
34  
35 after approval has been granted.  
36  
37  
38  
39  
40

41  
42 It is expected that this study will not require informed consent in most jurisdictions. This study  
43  
44 is, in effect, a large-scale clinical audit, as all data are collected routinely. This may justify a  
45  
46 waiver of consent. Any jurisdiction that deems informed consent necessary may use forms  
47  
48 provided on our website (<https://www.else.org/COVID19/ECMOCARD.aspx>). Within such  
49  
50 jurisdictions, patients who meet the eligibility criteria will be approached directly. If this is not  
51  
52 possible, due to the patient's incapacity, a model of retrospective or representative consent may  
53  
54 be used, per local requirements.  
55  
56  
57

### 58 59 **Dissemination**

1  
2  
3 Due to the evolving nature of the pandemic and the uncertainty surrounding its impact, this  
4 study was designed to be responsive to the international call for swift characterization of  
5 COVID-19 patients. Hence, in collaboration with University of Queensland and extramural  
6 collaboration with IBM Australia (St. Leonard's, Australia), a web-based dashboard has been  
7 developed to provide relevant data and descriptive statistics to international collaborators in  
8 real-time. The collected data will also eventually be made available and shared on a public  
9 open access platform once core research questions have been answered.  
10  
11  
12  
13  
14  
15  
16  
17  
18  
19

## 20 DISCUSSION

21  
22 Herein we have described the rationale and design of an international, multicenter,  
23 observational registry of COVID-19 patients admitted to an ICU. To date, the characterization  
24 of patients admitted to ICUs with COVID-19 has been limited to national or single-center  
25 series. This study, using a large collaborative network, attempts to overcome the limitations  
26 induced by small patient numbers and geographic restrictions, by providing real-time global  
27 data. In a pandemic of an emerging pathogen, high-quality, real-time information is crucial to  
28 guide an optimal response. The speed of this response and cumulative experience of ICUs  
29 worldwide offer the best framework for determining evidence-based best practices and,  
30 therefore, improving outcomes for those requiring critical care.  
31  
32  
33  
34  
35  
36  
37  
38  
39  
40  
41  
42  
43

44 The design of the COVID-19 CCC study has several strengths. First, the care of patients  
45 admitted to the ICU, specifically those who are mechanically ventilated, is dependent on  
46 regional resources and may vary. [21,22] This potential heterogeneity is mitigated by the  
47 international composition of the consortium. In addition, we are planning to further  
48 characterize individual ICUs, collecting data on nurse/doctor to patient ratio, capacity, and  
49 potential expanded capacity. Second, the study leverages novel data acquisition methods,  
50 which may improve and expedite data collection. Third, the registry-based, collaborative, and  
51  
52  
53  
54  
55  
56  
57  
58  
59  
60

1  
2  
3 open-source approach of the study lends itself to the conduct of multiple prospective sub-  
4  
5 studies. Fourth, the study incorporates the provision of a web-based dashboard, which provides  
6  
7 real-time data in an accessible format.  
8  
9

### 10 11 *Limitations* 12

13  
14 Patients will not receive identical treatments and care. While this will limit some aspects of  
15  
16 data analysis, it will also give breadth to the scope of the investigation, as data on laboratory  
17  
18 and patient characteristics, interventions and adjunct therapies, and outcomes will be available.  
19

20  
21  
22 This study relies on clinicians and support staff to accurately record data during a time of  
23  
24 increased patient influx and ICU workload, raising concerns over data input error and  
25  
26 completeness. To overcome this, coordinators at each site have access to regular training, as  
27  
28 well as ‘drop-in’ query sessions on-line.  
29  
30

31  
32 This study will provide inclusive global characterization of critically ill patients with COVID-  
33  
34 19. As the study is open-ended, continued data accrual will result in increased power to answer  
35  
36 hypothesis-led questions over time and guide the development of evidence-based patient  
37  
38 management tools to improve outcomes.  
39  
40  
41  
42  
43  
44  
45  
46  
47  
48  
49  
50  
51  
52  
53  
54  
55  
56  
57  
58  
59  
60

## REFERENCES

- 1 Zhu N, Zhang D, Wang W, *et al.* A Novel Coronavirus from Patients with Pneumonia in China, 2019. *N Engl J Med* 2020;:NEJMoa2001017. doi:10.1056/NEJMoa2001017
- 2 Gorbalenya AE. Severe acute respiratory syndrome-related coronavirus – The species and its viruses, a statement of the Coronavirus Study Group. *bioRxiv* 2020;:2020.02.07.937862. doi:10.1101/2020.02.07.937862
- 3 Dong E, Du H, Gardner L. An interactive web-based dashboard to track COVID-19 in real time. *Lancet Infect. Dis.* 2020;20:533–4. doi:10.1016/S1473-3099(20)30120-1
- 4 Docherty AB, Harrison EM, Green CA, *et al.* Features of 20 133 UK patients in hospital with covid-19 using the ISARIC WHO Clinical Characterisation Protocol: prospective observational cohort study. *BMJ* 2020;369:m1985. doi:10.1136/bmj.m1985
- 5 Barrasa H, Rello J, Tejada S, *et al.* SARS-CoV-2 in Spanish Intensive Care Units: Early experience with 15-day survival in Vitoria. *Anaesth Crit Care Pain Med* 2020;39:553–61. doi:10.1016/j.accpm.2020.04.001
- 6 Bhatraju PK, Ghassemieh BJ, Nichols M, *et al.* Covid-19 in Critically Ill Patients in the Seattle Region — Case Series. *N Engl J Med* 2020;382:2012–22. doi:10.1056/NEJMoa2004500
- 7 Grasselli G, Zangrillo A, Zanella A, *et al.* Baseline Characteristics and Outcomes of 1591 Patients Infected with SARS-CoV-2 Admitted to ICUs of the Lombardy Region, Italy. *JAMA - J Am Med Assoc* 2020;323:1574–81. doi:10.1001/jama.2020.5394
- 8 Yang X, Yu Y, Xu J, *et al.* Clinical course and outcomes of critically ill patients with SARS-CoV-2 pneumonia in Wuhan, China: a single-centered, retrospective, observational study. *Lancet Respir Med* 2020;8:475–81. doi:10.1016/S2213-2600(20)30079-5
- 9 Karagiannidis C, Mostert C, Hentschker C, *et al.* Case characteristics, resource use, and outcomes of 10 021 patients with COVID-19 admitted to 920 German hospitals: an observational study. *Lancet Respir Med* 2020;0. doi:10.1016/S2213-2600(20)30316-7
- 10 Wang D, Hu B, Hu C, *et al.* Clinical Characteristics of 138 Hospitalized Patients With 2019 Novel Coronavirus-Infected Pneumonia in Wuhan, China. *JAMA* Published Online First: 7 February 2020. doi:10.1001/jama.2020.1585
- 11 Ruan Q, Yang K, Wang W, *et al.* No Title. Published Online First: 3 March 2020. doi:10.1007/s00134-020-05991-x
- 12 Gattinoni L, Coppola S, Cressoni M, *et al.* COVID-19 Does Not Lead to a “Typical” Acute Respiratory Distress Syndrome. *Am J Respir Crit Care Med* 2020;201:1299–300. doi:10.1164/rccm.202003-0817LE
- 13 Marini JJ, Gattinoni L. Management of COVID-19 Respiratory Distress. *JAMA - J Am Med Assoc* Published Online First: 2020. doi:10.1001/jama.2020.6825
- 14 Klok FA, Kruip MJHA, van der Meer NJM, *et al.* Incidence of thrombotic complications in critically ill ICU patients with COVID-19. *Thromb Res* 2020;191:145–7. doi:10.1016/j.thromres.2020.04.013
- 15 Levi M, Thachil J, Iba T, *et al.* Coagulation abnormalities and thrombosis in patients with COVID-19. *Lancet Haematol.* 2020;7:e438–40. doi:10.1016/S2352-3026(20)30145-9
- 16 Harris PA, Taylor R, Thielke R, *et al.* Research electronic data capture (REDCap)—A metadata-driven methodology and workflow process for providing translational research informatics support. *J Biomed Inform* 2009;42:377–81. doi:10.1016/j.jbi.2008.08.010

- 1  
2  
3  
4  
5  
6  
7  
8  
9  
10  
11  
12  
13  
14  
15  
16  
17  
18  
19  
20  
21  
22  
23  
24  
25  
26  
27  
28  
29  
30  
31  
32  
33  
34  
35  
36  
37  
38  
39  
40  
41  
42  
43  
44  
45  
46  
47  
48  
49  
50  
51  
52  
53  
54  
55  
56  
57  
58  
59  
60
- 17 Wolkewitz M, Cooper BS, Bonten MJM, *et al.* Interpreting and comparing risks in the presence of competing events. *BMJ* 2014;**349**:g5060.
- 18 Steyerberg EW, Vickers AJ, Cook NR, *et al.* Assessing the performance of prediction models: A framework for traditional and novel measures. *Epidemiology*. 2010;**21**:128–38. doi:10.1097/EDE.0b013e3181c30fb2
- 19 Lundberg SM, Erion G, Chen H, *et al.* From local explanations to global understanding with explainable AI for trees. *Nat Mach Intell* 2020;**2**:56–67. doi:10.1038/s42256-019-0138-9
- 20 Collins GS, Reitsma JB, Altman DG, *et al.* Transparent reporting of a multivariable prediction model for individual prognosis or diagnosis (TRIPOD): The TRIPOD Statement. *BMC Med* 2015;**13**:1. doi:10.1186/s12916-014-0241-z
- 21 Bellani G, Laffey JG, Pham T, *et al.* Epidemiology, Patterns of Care, and Mortality for Patients With Acute Respiratory Distress Syndrome in Intensive Care Units in 50 Countries. *JAMA* 2016;**315**:788. doi:10.1001/jama.2016.0291
- 22 Rhodes A, Ferdinande P, Flaatten H, *et al.* The variability of critical care bed numbers in Europe. *Intensive Care Med* 2012;**38**:1647–53. doi:10.1007/s00134-012-2627-8

**Authors' contributions**

We hereby confirm that all authors listed below have provided substantial contributions to either the conception or design of the work; or the acquisition, analysis, or interpretation of data for the work; AND Drafting the work or revising it critically for important intellectual content; AND Final approval of the version to be published. In addition, all authors listed below agree to be accountable for all aspects of the work in ensuring that questions related to the accuracy or integrity of any part of the work are appropriately investigated and resolved.

*Concept and design:* Gianluigi Li Bassi; Jacky Y. Suen; Sebastiano Colombo; Heidi J. Dalton; John F. Fraser

*Planning:* Gianluigi Li Bassi; Jacky Y. Suen; Adrian G. Barnett; Amanda Corley; India Lye; Samuel Hinton; Sally Shrapnel; John F. Fraser.

*Acquisition, analysis, or interpretation of data:* Gianluigi Li Bassi; Jacky Y. Suen; Adrian G. Barnett; Amanda Corley; Jonathan E. Millar; Jonathon P. Fanning; India Lye; Sebastiano Colombo; Karin Wildi; Samantha Livingstone; Gabriella Abbate; Samuel Hinton; Benoit Liquet; Sally Shrapnel; Heidi J. Dalton; John F. Fraser.

*Drafting of the manuscript:* Gianluigi Li Bassi; Jacky Y. Suen; Jonathan E. Millar; Jonathon P. Fanning; Karin Wildi; Samantha Livingstone; Gabriella Abbate.

*Critical revision of the manuscript for important intellectual content:* Gianluigi Li Bassi; Jacky Y. Suen; Adrian G. Barnett; Amanda Corley; India Lye; Sebastiano Colombo; Samuel Hinton; Benoit Liquet; Sally Shrapnel; Heidi J. Dalton; John F. Fraser.

*Statistical analysis:* Adrian G. Barnett; Samuel Hinton; Benoit Liquet; Sally Shrapnel.

*Reporting:* Gianluigi Li Bassi; Jacky Y. Suen; Amanda Corley; Jonathan E. Millar; Jonathon P. Fanning; India Lye; Sebastiano Colombo; Karin Wildi; Samantha Livingstone; Gabriella Abbate; Samuel Hinton; Sally Shrapnel.



**Funding statement**

This work is supported by: the Common Good, an initiative of the Prince Charles Hospital Foundation; and, Wesley Medical Research, UnitingCare Health.

**Competing interests statement**

Gianluigi Li Bassi and John Fraser received research funds, through their affiliated institution, from Fisher & Paykel for studies related to high-flow oxygen therapy. None of the other authors have competing interests to declare.

**Word count**

2,322

**TABLES AND FIGURES****Figure 1. Schematic study overview**

The figure shows in detail periods of data collection into the ISARIC case report form (dark blue), COVID-19 Critical Care Consortium (COVID-19 CCC) case report form (red) and for both case report forms (light blue). As shown, data for the COVID-19 Critical Care Consortium can be collected and entered prospectively (preferred) or retrospectively dependent on the participating site's resources. The study ends at death, hospital discharge/transfer, or 28 days, whichever occurs latest.

|                      | Screening | ICU<br>Admission | Start<br>MV | Start<br>ECMO | Daily | Outcomes |
|----------------------|-----------|------------------|-------------|---------------|-------|----------|
| Eligibility criteria | x         |                  |             |               |       |          |
| Demographics         |           | x                |             |               |       |          |
| Co-morbidities       |           | x                |             |               |       |          |
| Severity scoring     |           | x                |             |               |       |          |
| Symptoms             |           | x                |             |               |       |          |
| ABG and biochemistry |           | x                | x           | x             | x     |          |
| Respiratory support  |           |                  | x           | x             | x     |          |
| Adjunctive therapies |           |                  | x           | x             | x     |          |
| ECMO parameters      |           |                  |             | x             | x     |          |
| Pulmonary mechanics  |           |                  |             | x             | x     |          |
| Microbiology         |           |                  |             |               | x     |          |
| Blood transfusion    |           |                  |             |               | x     |          |
| Length of stay       |           |                  |             |               |       | x        |
| Survival             |           |                  |             |               |       | x        |

**Table 1. Assessment schedule**

MV – mechanical ventilation; ECMO – extracorporeal membrane oxygenation; ABG – arterial blood gas.

1  
2  
3  
4  
5  
6  
7  
8  
9  
10  
11  
12  
13  
14  
15  
16  
17  
18  
19  
20  
21  
22  
23  
24  
25  
26  
27  
28  
29  
30  
31  
32  
33  
34  
35  
36  
37  
38  
39  
40  
41  
42  
43  
44  
45  
46  
47  
48  
49  
50  
51  
52  
53  
54  
55  
56  
57  
58  
59  
60

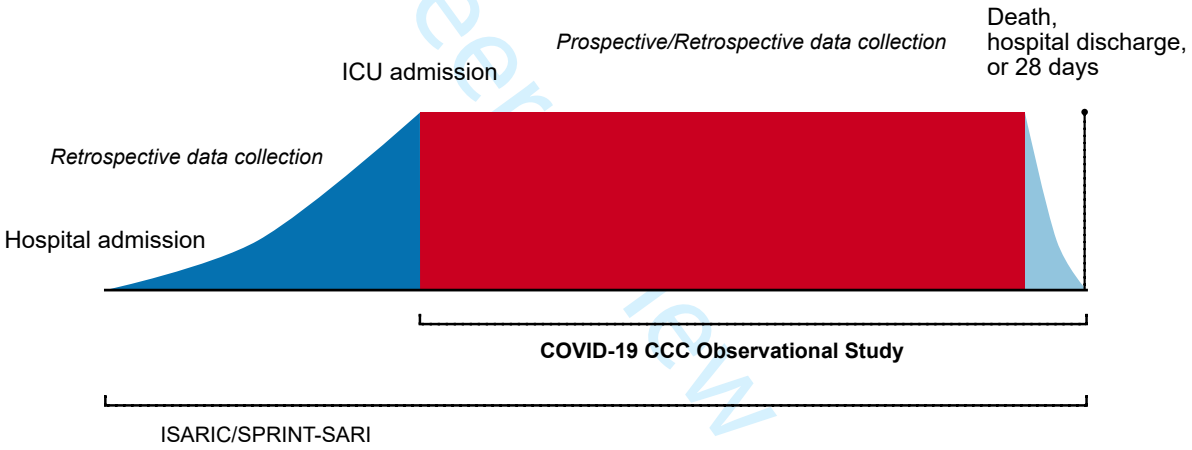

1  
2  
3 **The COVID-19 Critical Care Consortium observational study:**  
4 **Design and rationale of a prospective, international, multicenter,**  
5 **observational study**  
6  
7  
8  
9

10  
11  
12  
13  
14  
15 **SUPPLEMENTAL FILES**  
16  
17  
18  
19  
20  
21  
22  
23  
24  
25  
26  
27  
28  
29  
30  
31  
32  
33  
34  
35  
36  
37  
38  
39  
40  
41  
42  
43  
44  
45  
46  
47  
48  
49  
50  
51  
52  
53  
54  
55  
56  
57  
58  
59  
60

For peer review only

1  
2  
3  
4  
5  
6  
7  
8  
9  
10  
11  
12  
13  
14  
15  
16  
17  
18  
19  
20  
21  
22  
23  
24  
25  
26  
27  
28  
29  
30  
31  
32  
33  
34  
35  
36  
37  
38  
39  
40  
41  
42  
43  
44  
45  
46  
47  
48  
49  
50  
51  
52  
53  
54  
55  
56  
57  
58  
59  
60

For peer review only

# **SUPPLEMENT 1**

# **STUDY PROTOCOL**

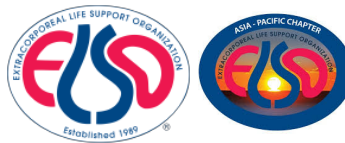

# Covid-19 Critical Care Consortium Observational Study

*Incorporating the  
ExtraCorporeal Membrane Oxygenation for 2019 novel Coronavirus  
Acute Respiratory Disease*

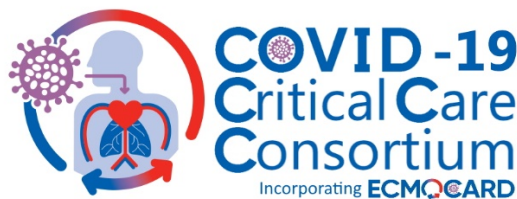

**v. 1.2.8**

**Chief Investigators:**

|                                                                                                                                                                                                                                                                                                                                                                                                                                                                                                                                                                                                                                           |                                                                                                                                                                                                                                                                                                                                                                                                                                                                                                                                                                                                                                                                        |
|-------------------------------------------------------------------------------------------------------------------------------------------------------------------------------------------------------------------------------------------------------------------------------------------------------------------------------------------------------------------------------------------------------------------------------------------------------------------------------------------------------------------------------------------------------------------------------------------------------------------------------------------|------------------------------------------------------------------------------------------------------------------------------------------------------------------------------------------------------------------------------------------------------------------------------------------------------------------------------------------------------------------------------------------------------------------------------------------------------------------------------------------------------------------------------------------------------------------------------------------------------------------------------------------------------------------------|
| <p><b>A/Prof Gianluigi LI BASSI</b><br/>University of Queensland<br/>Level 3   Clinical Sciences Building<br/>Chermside Qld 4032<br/>Australia<br/>T:+61 7 3139 6880<br/>Mobile: +61 0421273217<br/>Email: <a href="mailto:g.libassi@uq.edu.au">g.libassi@uq.edu.au</a></p> <p><b>Dr. Jacky SUEN</b><br/>University of Queensland<br/>Level 3   Clinical Sciences Building<br/>Chermside Qld 4032<br/>Australia<br/>T:+61 7 3139 6880<br/>Mobile: +61 400128961<br/>Email: <a href="mailto:j.suen1@uq.edu.au">j.suen1@uq.edu.au</a></p> <p><b>Prof. John Fraser</b><br/>President Elect Asian-Pacific Extracorporeal Life<br/>Support</p> | <p><b>Prof Heidi Dalton</b><br/>Inova Fairfax Hospital<br/>3300 Gallows Rd Pediatrics<br/>Falls Church, VA 22042-3307<br/>United States<br/>T:+1 703-776-6041<br/>Email: <a href="mailto:heidi.dalton26@gmail.com">heidi.dalton26@gmail.com</a></p> <p><b>Prof Adrian BARNETT</b><br/>Queensland University of Technology<br/>Faculty of Health,<br/>School - Public Health and Social Work,<br/>Research - Public Health<br/>T: +61 7 3138 6010<br/>Email: <a href="mailto:a.barnett@qut.edu.au">a.barnett@qut.edu.au</a></p> <p><b>Dr Sally SHRAPNEL</b><br/>University of Queensland<br/>School of Mathematics and Physics<br/>Faculty of Science<br/>Australia</p> |
|-------------------------------------------------------------------------------------------------------------------------------------------------------------------------------------------------------------------------------------------------------------------------------------------------------------------------------------------------------------------------------------------------------------------------------------------------------------------------------------------------------------------------------------------------------------------------------------------------------------------------------------------|------------------------------------------------------------------------------------------------------------------------------------------------------------------------------------------------------------------------------------------------------------------------------------------------------------------------------------------------------------------------------------------------------------------------------------------------------------------------------------------------------------------------------------------------------------------------------------------------------------------------------------------------------------------------|



|                                                                                                             |                                                                                                     |
|-------------------------------------------------------------------------------------------------------------|-----------------------------------------------------------------------------------------------------|
| <p>University of Queensland<br/>Level 3   Clinical Sciences Building<br/>Chermside Qld 4032 – Australia</p> | <p>T: +61 7 336 56931<br/>Email: <a href="mailto:s.shrapnel@uq.edu.au">s.shrapnel@uq.edu.au</a></p> |
|-------------------------------------------------------------------------------------------------------------|-----------------------------------------------------------------------------------------------------|

### ECMOCARD Research Coordinator:

**Amanda Corley**

Critical Care Research Group  
Level 3 | Clinical Sciences Building  
The Prince Charles Hospital  
Chermside Qld 4032  
Australia

Email: [Amanda.Corley@health.qld.gov.au](mailto:Amanda.Corley@health.qld.gov.au)

**criticalcare**  
RESEARCH GROUP

### ECMOCARD Project Officer:

**Gaenor Cross**

Critical Care Research Group  
Level 3 | Clinical Sciences Building  
The Prince Charles Hospital  
Chermside Qld 4032  
Australia

Email: [Gaenor.Cross@health.qld.gov.au](mailto:Gaenor.Cross@health.qld.gov.au)

### ECMOCARD Coordinating Centres:

Extracorporeal Life Support Organisation And Asia-Pacific Life Support Organisation

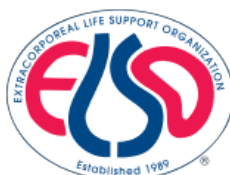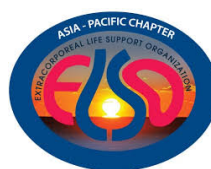

Critical Care Research Group  
Level 3 | Clinical Sciences Building

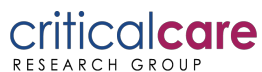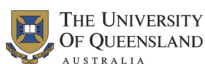

CONFIDENTIAL

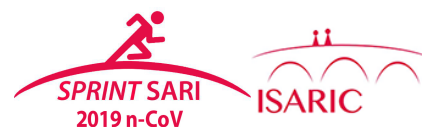

The Prince Charles Hospital

Chermside Qld 4032

Australia

Email: [fraserjohn001@gmail.com](mailto:fraserjohn001@gmail.com)

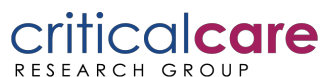

For peer review only

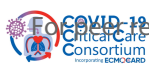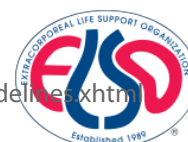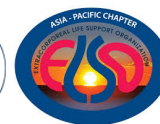

## COVID-19 Critical Care Consortium Steering Committee

### President:

**Robert H Bartlett**, Department of Surgery, University of Michigan, Ann Arbor, MI, USA.

### Committee:

1. **Daniel Brodie**, Department of Medicine, Columbia University College of Physicians and Surgeons, and Center for Acute Respiratory Failure, New York-Presbyterian Hospital, New York, NY, USA
2. **Davide Chiumello**, San Paolo Hospital and University of Milan, Milan, Italy
3. **Heidi J Dalton**, INOVA Fairfax Hospital, Falls Church, Virginia, USA
4. **Eddy Fan**, Interdepartmental Division of Critical Care Medicine, University of Toronto, Toronto, Canada.
5. **John F Fraser**, Critical Care Research Group, The University of Queensland and The Prince Charles Hospital, Chermside, Australia
6. **Alyaa Elhazmi**, King Faisal Specialist Hospital and Research Centre, Riyadh, Saudi Arabia
7. **Carol L Hodgson**, Australian and New Zealand Intensive Care Research Centre/ The Alfred Hospital/Monash University, Melbourne, Australia.
8. **Huynh Trung Trieu**, Hospital for Tropical Diseases, Ho Chi Minh City, Vietnam
9. **Shingo Ichiba**, Department of Surgical Intensive Care Medicine, Nippon Medical School Hospital.
10. **John G Laffey**, Regenerative Medicine Institute (REMEDI) at CÚRAM Centre for Research in Medical Devices, Biomedical Sciences Building, National University of Ireland Galway, Galway, Ireland; Department of Anaesthesia and Intensive Care Medicine, Galway University Hospitals, and School of Medicine, Clinical Sciences Institute, National University of Ireland, Galway, Ireland
11. **Gianluigi Li Bassi**, Critical Care Research Group, The University of Queensland and The Prince Charles Hospital, Chermside, Australia
12. **Carlos Luna**, Department of Medicine, Pulmonary Diseases Division, Hospital de Clínicas, Universidad de Buenos Aires, Buenos Aires, Argentina.
13. **Srinivas Murthy**, BC Children's Hospital, Department of Pediatrics, University of British Columbia, Vancouver, Canada.

- 1  
2  
3  
4  
5  
6  
7  
8  
9  
10  
11  
12  
13  
14  
15  
16  
17  
18  
19  
20  
21  
22  
23  
24  
25  
26  
27  
28  
29  
30  
31  
32  
33  
34  
35  
36  
37  
38  
39  
40  
41  
42  
43  
44  
45  
46  
47  
48  
49  
50  
51  
52  
53  
54  
55  
56  
57  
58  
59  
60
14. **Alistair Nichol**, Critical Care Medicine, University College Dublin Clinical Research Centre at St Vincent's University Hospital, Dublin; Australian and New Zealand Intensive Care Research Centre, Monash University and Alfred Hospital Dept of Intensive Care, Melbourne, Australia.
  15. **Mark T Ogino**, Department of Paediatrics, Division of Neonatology, Nemours Alfred I duPont Hospital for Children, Wilmington, DE, USA; Sidney Kimmel Medical College, Thomas Jefferson University, Philadelphia, PA, USA.
  16. **Jacky Y Suen**, Critical Care Research Group, The University of Queensland and The Prince Charles Hospital, Chermside, Australia
  17. **Antoni Torres**, Department of Pulmonology Hospital Clinic, University of Barcelona, IDIBAPS, Barcelona, Spain. CIBERESUCICOVID
  18. **Antonio Pesenti**, Fondazione IRCCS Ca' Granda Ospedale Maggiore, Angelo Bianchi Bonomi Hemophilia and Thrombosis Center, Fondazione Luigi Villa, Milano, Italy
  19. **Pauline Y Ng**, Division of Respiratory and Critical Care Medicine, Department of Medicine, The University of Hong Kong; Adult Intensive Care Unit, Queen Mary Hospital, Hong Kong.

## Summary

|                                 |                                                                                                                                                                                                                                                                                                                                                                                                                                                                                                                                      |
|---------------------------------|--------------------------------------------------------------------------------------------------------------------------------------------------------------------------------------------------------------------------------------------------------------------------------------------------------------------------------------------------------------------------------------------------------------------------------------------------------------------------------------------------------------------------------------|
| <b>Scientific Title</b>         | <b>Covid-19 Critical Care Consortium</b><br><b>Incorporating the</b><br>ExtraCorporeal Membrane Oxygenation for 2019 novel Coronavirus Acute Respiratory Disease (ECMOCARD)                                                                                                                                                                                                                                                                                                                                                          |
| <b>Study Design</b>             | Prospective/Retrospective multi-centre short period incidence observational study of patients in participating hospitals and intensive care units (ICUs) with 2019 novel coronavirus (COVID-19).                                                                                                                                                                                                                                                                                                                                     |
| <b>The Collaborative</b>        | <b>In response to the COVID-19 outbreak and to assist in pandemic planning both locally and globally, a research collaborative has been assembled.</b> The collaborative consists of investigators from the Asia-Pacific extracorporeal life support organization (APELSO) in collaboration with centres within the SPRINT-SARI and ISARIC Network. In Australia, this study will be also complemented through collaboration with the “National registry on the treatment and outcomes of patients requiring ECMO” (EXCEL Registry). |
| <b>Study Aim and Objectives</b> | To describe clinical features; severity of pulmonary dysfunction; incidence of ICU admission and use of mechanical ventilation, coagulatory and thrombotic derangement, and ECMO technical characteristics; duration of ECMO; complications; and survival of patients with COVID-19.                                                                                                                                                                                                                                                 |
| <b>Inclusions/Exclusions</b>    | All patients admitted to ICU with clinical suspicion or lab-confirmed COVID-19 infection by real-time PCR and/or next-generation sequencing will be included. Patients receiving mechanical ventilation or ECMO for other concomitant causes will be excluded.                                                                                                                                                                                                                                                                       |
| <b>Consent</b>                  | Given the negligible risk associated with this study and the timely nature in which the data needs to be collected, a waiver of consent is sought.                                                                                                                                                                                                                                                                                                                                                                                   |
| <b>Study Setting</b>            | International multi-centre study, conducted in all collaborating hospitals/ICU-based research networks in Asia, Australia and New Zealand, Europe.                                                                                                                                                                                                                                                                                                                                                                                   |
| <b>Sample Size</b>              | All patients with confirmed COVID-19 infection admitted to ICUs at the collaborative centres                                                                                                                                                                                                                                                                                                                                                                                                                                         |
| <b>Study Start Date</b>         | From the commencement of COVID-19 global epidemic                                                                                                                                                                                                                                                                                                                                                                                                                                                                                    |
| <b>Study Duration</b>           | Until completion of COVID-19 global epidemic, as judged by the World Health Organization                                                                                                                                                                                                                                                                                                                                                                                                                                             |

|                                         |                                                                                                                                                                                                                                                                                                                                                                                                                                                                                                                                                                                                                                                                                                                                                                                                                                                                                                                                                                                                                                                             |
|-----------------------------------------|-------------------------------------------------------------------------------------------------------------------------------------------------------------------------------------------------------------------------------------------------------------------------------------------------------------------------------------------------------------------------------------------------------------------------------------------------------------------------------------------------------------------------------------------------------------------------------------------------------------------------------------------------------------------------------------------------------------------------------------------------------------------------------------------------------------------------------------------------------------------------------------------------------------------------------------------------------------------------------------------------------------------------------------------------------------|
| <p><b>Data collection processes</b></p> | <p>Patients will be studied from time of ICU admission until hospital discharge or up to 28 days post ICU admission, whichever occurs later. All clinical information will only be recorded if taken as part of routine clinical practice at each site. Only re-identifiable data will be submitted centrally (REDCap hosted at Oxford University for International centres and at Monash University for Australian centres). A specific ECMOCARD Case Report Form (CRF) will be used by participating sites to collect a minimum data set of ICU, mechanical ventilation and ECMO data. Data for ECMOCARD and SPRINT SARI observational study will be concomitantly collected. Data will be recorded into REDcap through standard data collection or interactive augmented human experience via digital interaction by voice or touch monitors or digital transcription of CRF hard copies. In Australia, patients concomitantly included into the EXCEL registry, EXCEL data will be requested to complement ECMOCARD data and reduce daily workload.</p> |
|-----------------------------------------|-------------------------------------------------------------------------------------------------------------------------------------------------------------------------------------------------------------------------------------------------------------------------------------------------------------------------------------------------------------------------------------------------------------------------------------------------------------------------------------------------------------------------------------------------------------------------------------------------------------------------------------------------------------------------------------------------------------------------------------------------------------------------------------------------------------------------------------------------------------------------------------------------------------------------------------------------------------------------------------------------------------------------------------------------------------|

For peer review only

## Table of contents

|                                                                                             |           |
|---------------------------------------------------------------------------------------------|-----------|
| <b>COVID-19 CRITICAL CARE CONSORTIUM STEERING COMMITTEE</b> .....                           | <b>6</b>  |
| <b>SUMMARY</b> .....                                                                        | <b>8</b>  |
| <b>TABLE OF CONTENTS</b> .....                                                              | <b>10</b> |
| <b>INTRODUCTION</b> .....                                                                   | <b>12</b> |
| INTERNATIONAL SEVERE ACUTE RESPIRATORY AND EMERGING INFECTION CONSORTIUM (ISARIC) .....     | 12        |
| SHORT PERIOD INCIDENCE STUDY OF SEVERE ACUTE RESPIRATORY INFECTION (SPRINT-SARI) .....      | 13        |
| CORONAVIRUSES.....                                                                          | 14        |
| 2019 NOVEL CORONAVIRUS (COVID-19) .....                                                     | 14        |
| <b>OBJECTIVES</b> .....                                                                     | <b>18</b> |
| HYPOTHESIS .....                                                                            | 18        |
| AIMS .....                                                                                  | 18        |
| <b>MATERIALS AND METHODS</b> .....                                                          | <b>18</b> |
| STUDY DESIGN .....                                                                          | 18        |
| RESEARCH CENTRES .....                                                                      | 19        |
| STUDY POPULATION .....                                                                      | 19        |
| <i>Inclusion Criteria</i> .....                                                             | 19        |
| <i>Exclusion Criteria</i> .....                                                             | 19        |
| <i>Co-enrolment</i> .....                                                                   | 19        |
| <b>ETHICS</b> .....                                                                         | <b>20</b> |
| GUIDING PRINCIPLES .....                                                                    | 20        |
| COMPLY WITH ALL LOCAL REQUIREMENTS .....                                                    | 20        |
| <b>CONFIDENTIALITY OF PATIENT DATA</b> .....                                                | <b>20</b> |
| RULE OF TRANSFER.....                                                                       | 21        |
| INTERNATIONAL WAIVER OF INFORMED CONSENT .....                                              | 21        |
| INFORMED CONSENT IN AUSTRALIA .....                                                         | 22        |
| <b>DATA COLLECTION</b> .....                                                                | <b>22</b> |
| ISARIC DATA COLLECTION .....                                                                | 22        |
| ECMOCARD DATA COLLECTION.....                                                               | 23        |
| COAGULATION DISORDERS AND THROMBOSIS SUB-STUDY DATA COLLECTION .....                        | 24        |
| SCREENING LOG .....                                                                         | 28        |
| DATA QUALITY.....                                                                           | 28        |
| DATA MANAGEMENT .....                                                                       | 28        |
| MONITORING .....                                                                            | 29        |
| COLLECTED PARAMETERS.....                                                                   | 29        |
| <i>Demographics and Medical History</i> .....                                               | 29        |
| <i>COVID-19 infection</i> .....                                                             | 30        |
| <i>Clinical parameters upon commencement of invasive mechanical ventilation</i> .....       | 30        |
| <i>Daily assessment of clinical parameters during invasive mechanical ventilation</i> ..... | 30        |
| <i>Clinical features before commencement of ECMO</i> .....                                  | 31        |
| <i>ECMO characteristics</i> .....                                                           | 32        |
| <i>ECMO adverse effects</i> .....                                                           | 32        |
| <i>ECMO adverse effects</i> .....                                                           | 33        |
| <i>Daily assessments for Coagulation Disorders and Thrombosis Sub-study</i> .....           | 33        |
| <i>Main outcomes</i> .....                                                                  | 33        |
| <b>DATA ANALYSIS</b> .....                                                                  | <b>34</b> |



1  
2  
3  
4  
5  
6  
7  
8  
9  
10  
11  
12  
13  
14  
15  
16  
17  
18  
19  
20  
21  
22  
23  
24  
25  
26  
27  
28  
29  
30  
31  
32  
33  
34  
35  
36  
37  
38  
39  
40  
41  
42  
43  
44  
45  
46  
47  
48  
49  
50  
51  
52  
53  
54  
55  
56  
57  
58  
59  
60

**REFERENCE LIST .....35**

**REGULATION, ETHICS AND GOVERNANCE.....38**

    CONFLICT OF INTEREST .....38

    DATA COLLECTION AND SITE MONITORING PLAN .....38

*Data Collection* .....38

*Site Monitoring* .....38

*Compensations* .....38

    DATA ACCESS .....39

**FEASIBILITY .....39**

**DISSEMINATION AND PUBLICATION .....39**

    PUBLICATION POLICY .....39

    AUTHORSHIP POLICY .....40

For peer review only

## Introduction

The ExtraCorporeal Membrane Oxygenation for 2019 novel Coronavirus Acute Respiratory Disease (ECMOCARD Trial) will be carried out within the network and web-based case collection forms of the ISARIC consortium's SPRINT-SARI study and in Australian and New Zealand centres, upon conclusion of the epidemics, potentially complemented through the study "A comprehensive national registry on the treatment and outcomes of patients requiring ECMO" (EXCEL Registry).

### International Severe Acute Respiratory and Emerging Infection Consortium (ISARIC)

The International Severe Acute Respiratory and Emerging Infection Consortium (ISARIC) was formed in 2011, in response to global recognition of the unmet need for timely and effective clinical research during outbreaks of emerging infectious disease with epidemic or pandemic potential. ISARIC represents a new paradigm for effective, coordinated, and timely collaborative clinical research during rapidly emerging threats to public health. It is collaboration among clinicians, clinical researchers, epidemiologists, ethicists, statisticians, laboratory-based clinicians, basic scientists, and public health experts. The mission of ISARIC is to develop operational readiness and to co-ordinate the conduct of essential clinical research to characterise and respond to new epidemic or pandemic infectious disease threats, thereby informing and guiding evidence-based optimal management. ISARIC is facilitating the coordination of SPRINT-SARI, which supports ISARIC's goal of improving the effectiveness of clinical researching globally during a pandemic by:

1. Establishing protocols, with standardised definitions and study methods, for conducting time-critical research during outbreaks of emerging infectious diseases;
2. Coordinating a large number of globally diversified hospitals and/or ICU-based networks with pre-existing ethics, administrative, regulatory and logistics in place, sufficient to implement study protocols, especially including regions where this type of clinical research has traditionally not been performed;
3. Identifying and solving barriers to pandemic research, including those identified in SPRINT-SARI;
4. Studying SARI globally, providing evidence on SARI microbiology, treatment and outcome in both resource-rich and resource-poor settings;

5. Allowing ISARIC to evaluate its research capacity and capabilities; and
6. Assisting ISARIC to maintain network stakeholders during inter-pandemic periods.

### Short PeRIod IncideNce sTudy of Severe Acute Respiratory Infection (SPRINT-SARI)

Severe acute respiratory infection (SARI) continues to be of major relevance to public health worldwide. In the last 10 years there have been multiple SARI outbreaks around the world. The 2009 H1N1 pandemic was estimated to result in more than 200,000 respiratory deaths globally<sup>1-3</sup>. The World Health Organization (WHO) defines SARI as an acute respiratory infection of recent onset (within 10 days) requiring hospitalisation, manifested by fever ( $\geq 38^{\circ}\text{C}$ ) or a history of fever and cough<sup>4-6</sup>. There is international consensus that it is important to undertake observational studies of patients with SARI as an essential component of pandemic and epidemic research preparedness.

The primary aim of the SPRINT-SARI study was to establish a research response capability for future epidemics / pandemics through a global SARI observational study. The secondary aim of this study was to describe the clinical epidemiology and microbiology profiles of patients with SARI. The tertiary aim of this study was to assess the Ethics, Administrative, Regulatory and Logistic (EARL) barriers to conducting pandemic research on a global level. SPRINT-SARI was designed as a multi-centre, prospective, short period incidence observational study of patients in participating hospitals and intensive care units (ICUs) with SARI. The study period was planned to occur, in both Northern and Southern hemispheric winters. The study period comprised a 5 to 7-day cohort study in which patients meeting a SARI case-definition, who are newly admitted to the hospitals/ICUs at participating sites, will be included in the study. The study was planned to be conducted in 20 to 40-hospital/ ICU-based research networks globally. All clinical information and sample data were planned to only be recorded if taken as part of the routine clinical practice at each site and only fully anonymised and re-identifiable data will be submitted centrally. The primary outcome of SPRINT-SARI was to test the feasibility of conducting a global study of SARI.

#### Secondary Outcomes:

1. Incidence of SARI
2. Disease severity and risk factors for severe disease due to SARI
3. Case Fatality Proportion of SARI
4. Duration of ICU/hospital stay due to SARI

5. Microbiology of SARI, including variability in testing
6. Treatments received during hospitalization for SARI
7. Evaluate impact on incidence of alternative case-definitions of SARI
8. Evaluate the operational characteristics of this study, including CRF, Completion Guidelines, and entry criteria to provide information by which iterative improvement in study design can be achieved.
9. Explore the feasibility of extrapolation of results obtained at participating sites to population levels

## Coronaviruses

Coronaviruses are a family of enveloped, single-stranded, positive-strand RNA viruses classified within the Nidovirales. Coronaviruses may infect mammals and birds, triggering respiratory, enteric, hepatic, and neurologic diseases<sup>7</sup>. Six coronavirus species are known to cause human disease. The coronaviruses 229E, OC43, NL63, and HKU1 are prevalent worldwide and most commonly cause only marginal respiratory symptoms. Two other strains, the severe acute respiratory syndrome coronavirus (SARS-CoV) and Middle East respiratory syndrome coronavirus (MERS-CoV) have originated from animal to human transmission and have caused more serious, sometimes fatal, respiratory illnesses. In previous years, SARS-CoV<sup>8,9</sup> and MERS-CoV<sup>10,11</sup>, have caused serious respiratory infections, with mortality rates of 10% for SARS-CoV<sup>12</sup> and 37% for MERS-CoV<sup>13</sup>.

## 2019 Novel Coronavirus (COVID-19)

In late December, 2019, in Wuhan, Hubei, China, a new respiratory syndrome emerged with clinical signs resembling viral pneumonia and person-to-person transmission<sup>14</sup>. Prompt diagnostic methods, through deep sequencing analysis from lower respiratory tract samples, corroborated emergence of a novel coronavirus, namely the 2019 novel coronavirus (COVID-19). In particular, Na Zhu and collaborators<sup>15</sup> were able to isolate the virus from bronchoalveolar lavage (BAL) from patients with pneumonia of unknown cause, who were in Wuhan on December 21, 2019 or later, and who had been present at the Huanan Seafood Market. RNA extracted from BAL fluid from the patients was used as a template to clone and sequence a genome using a combination of Illumina sequencing and nanopore sequencing. More than 20,000 viral reads from individual specimens were obtained, and most contigs

matched to the genome from lineage B of the genus betacoronavirus — showing more than 85% identity with a bat SARS-like CoV (bat-SL-CoVZC45, MG772933.1) genome. Virus isolation from the clinical specimens was performed with human airway epithelial cells and Vero E6 and Huh-7 cell lines. 2019-nCoV–infected human airway epithelial cultures were examined with light microscopy and with transmission electron microscopy 6 days after inoculation. Cytopathic effects were observed 96 hours after inoculation on surface layers of human airway epithelial cells and lack of cilium beating was seen with light microscopy (Fig. 1).

**Figure 1**

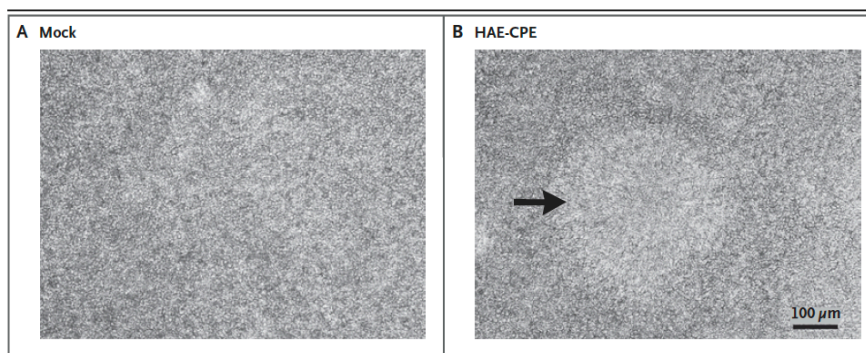

Figure 1: Cytopathic effect of the novel coronavirus, as reported in previous publication<sup>15</sup>

Through transmission electron microscopy, the authors were able to image the COVID-19 particles, that generally appeared spherical, of 60 to 140 nm, with some pleomorphism and distinctive spikes, about 9 to 12 nm (Fig. 3), and gave virions the appearance of a solar corona. This morphology corroborated the Coronaviridae family.

**Figure 2**

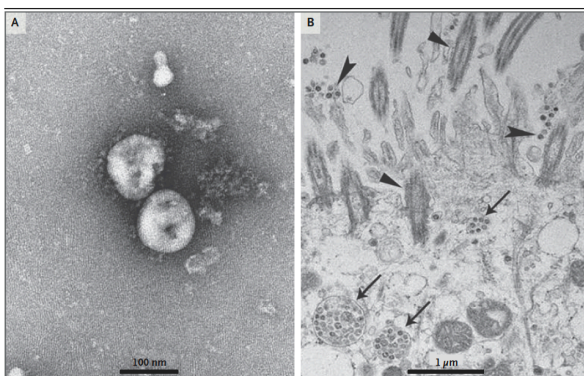

Figure 2: A: COVID-19 particles are depicted. B: COVID-19 in human airway epithelium, as reported in previous publication<sup>15</sup>.



Finally, investigators carried out inclusive phylogenetic analysis that showed that COVID-19 falls into the genus betacoronavirus, which includes coronaviruses as SARS-CoV, bat SARS-like CoV, and others from humans, bats, and other wild animals.

Thus far, more than 111,000 confirmed cases, including health-care workers, have been identified worldwide, and several exported cases have been confirmed in other provinces in China, Thailand<sup>16</sup>, Japan<sup>17</sup>, South Korea<sup>18</sup>, Germany, Italy<sup>19</sup>, France, Iran<sup>20</sup>, USA<sup>21</sup> and many other countries<sup>22</sup>. An early case report in 41 patients with laboratory-confirmed COVID-19 infection in Wuhan has been reported<sup>23</sup>. The median age of the patients was 49 years and mostly men (73%). Among those, 32% were admitted to the ICU because they required high-flow nasal cannula or higher-level oxygen support measures to correct hypoxaemia. Less than half had underlying diseases, including diabetes (20%), hypertension (15%), and cardiovascular diseases (15%). On admission, 98% of the patients had bilateral multiple lobular and subsegmental areas of consolidation (Figure 3)<sup>24</sup>.

**Figure 3**



Figure 3 Caption: Transverse chest CT images from a 40-year-old man showing bilateral multiple lobular and subsegmental areas of consolidation on day 15 after symptom onset. Transverse chest CT images from a 53-year-old woman showing bilateral ground-glass opacity and subsegmental areas of consolidation on day 8 after symptom onset, adapted from<sup>23</sup>

Importantly, acute respiratory distress syndrome (ARDS) developed in 29% of the patients, while acute cardiac injury in 12%, and secondary infection in 10%. Invasive mechanical ventilation was required in 10% of those patients, **and two of them (5%) had refractory hypoxaemia and received extracorporeal membrane oxygenation (ECMO).**

1  
2  
3  
4  
5  
6  
7  
8  
9  
10  
11  
12  
13  
14  
15  
16  
17  
18  
19  
20  
21  
22  
23  
24  
25  
26  
27  
28  
29  
30  
31  
32  
33  
34  
35  
36  
37  
38  
39  
40  
41  
42  
43  
44  
45  
46  
47  
48  
49  
50  
51  
52  
53  
54  
55  
56  
57  
58  
59  
60

In a later retrospective report by Wang and collaborators<sup>25</sup>, clinical characteristics of 138 patients with COVID-19 infection were described. Those patients were admitted at Zhongnan Hospital of Wuhan University in Wuhan, China, from January 1 to January 28, 2020. The median age was 56 years and clinical signs of the infection comprised fever (98.6%), fatigue (69.6%), and dry cough (59.4%). Interestingly, lymphopenia occurred in 70.3% of the patients, prolonged prothrombin time 58%, and elevated lactate dehydrogenase 39.9%. ICU admission was required in 26.1% of the patients for acute respiratory distress syndrome (61.1%), arrhythmia (44.4%), and shock (30.6%). Among these patients, 11.1% received high-flow oxygen therapy, 41.7% noninvasive ventilation, and 47.2% invasive ventilation. **ECMO support was needed in 11% of the patients admitted to the ICU.** During the period of follow-up, overall mortality was 4.3%.

## Objectives

### Hypothesis

We hypothesize that a significant percentage of patients with COVID-19 infection will require admission to the intensive care unit, mechanical ventilation and ECMO for refractory hypoxemia, in addition a substantial proportion of patients will present coagulation disorders and thrombosis.

### Aims

This is a multi-centre international study in patients with suspected or confirmed COVID-19 who require admission to the intensive care unit, mechanical ventilation and/or ECMO to characterize the following features:

1. Incidence of ICU admission, use of mechanical ventilation and ECMO
2. Risk factors
3. Clinical features
4. Coagulation disorders and thrombosis
5. Severity of respiratory failure
6. Need for non-invasive and invasive mechanical ventilation and ECMO
7. Settings of invasive mechanical ventilation
8. ECMO technical characteristics
9. Duration of ECMO
10. Complications
11. ICU survival
12. Hospital survival.
13. Requirements and the time frame for approvals in each participating network region

## Materials and Methods

### Study Design

This is an international multi-centre, prospective/retrospective observational study of patients in participating hospitals and ICUs with suspected or confirmed COVID-19 infection. The study will be conducted at 20 to 90 hospital networks globally and will aim to recruit as many patients as possible. The aim is to recruit all eligible patients at each study location and



there is no maximum number of patients that can be recruited from any one site. Patients will be studied from time of ICU admission up to 28 days or until hospital discharge, whichever occurs later. Information will be collected on demographics, co-existing illnesses, severity of illness, source and type of clinical specimens (upper versus lower respiratory tract and collection date), results of microbiological tests. ECMOCARD will specifically focus on collecting data of mechanical ventilation and ECMO and administration of other major therapies (including vasoactive therapies, hypoxaemia rescue therapies, and dialysis), administration of antibiotics and antivirals (and adjunctive therapies, e.g. immunomodulators, corticosteroids) and outcomes at ICU (if applicable), hospital discharge and 28 days.

### Research centres

This is a collaborative effort among investigators of the Asia-Pacific extracorporeal life support organization (APELSO) in collaboration with centres within the SPRINT-SARI and ISARIC Network.

### Study Population

We plan to recruit as many patients as possible of the patients with COVID-19 infection admitted to the ICU, in as many locations as possible, who meet the inclusion criteria with no-exclusion criteria at the participating sites. It is anticipated that each participating Institution could contribute between 5 and 50 patients. Each site's recruitment will be determined by the incidence of the disease during the study period, and their ability to collect the required data.

### Inclusion Criteria

1. Clinical suspicion or laboratory-confirmed COVID-19 infection by real-time PCR and/or next-generation sequencing
2. Admission to an intensive care unit

### Exclusion Criteria

3. Patients treated with mechanical ventilation for other concomitant causes
4. Patients treated with ECMO for other concomitant causes

### Co-enrolment

This is an observational study. Co-enrolment with other studies including interventional clinical trials is accepted.

## Ethics

### Guiding Principles

The Chief Investigators and study management team are responsible for ensuring the study is performed in accordance with the protocol. This study is to be performed in accordance with the ethical principles of the Declaration of Helsinki (June 1964, most recently amended in October 2013), and the most recent, relevant ethical conduct of research guidelines published in the country of the participating site. The Principal Investigator at each site is responsible for maintenance of a securely held enrolment log linking the patient hospital record number and the study number as per their countries research guidelines.

### Comply with all local requirements

National or regional Co-ordinators in their defined location will be responsible for clarifying the requirements for ethics approval. It is the responsibility of the site Chief Investigator and Research Co-ordinator to ensure ethics approval has been granted prior to commencing the study and all local requirements are addressed. Each participating site will require ethics approval for this protocol and data collection of the ECMOCARD and ISARIC SPRINT-SARI CRF (RAPID, CORE, SUPPLEMENTARY TO CORE, DAILY and EPIDEMIOLOGY) and any other study documents relevant to their region. When possible, each participating study site will be supported by the ECMOCARD, Project Officer with their application. The Principal Investigator will produce progress reports, and any other required documentation for the local independent Ethics Committee in accordance with their guidelines. It is the responsibility of the Chief Investigator at each participating hospital to keep an up to date record of all correspondence and applicable documentation with the local Independent Ethics Committee. We will be collecting data on the requirements and the time frame for approvals in each participating network region.

### Confidentiality of patient data

No identifying data will be entered into the central database. Participants' names will not be collected, and confidentiality of information in medical records will be preserved. The confidentiality of the participant will be maintained unless disclosure is to comply with the law. To adhere to international ethical review board requirements and facilitate global ECMOCARD and SPRINT-SARI ISARIC data polling/sharing the CLiRes Data Management

System will convert all dates entered (DD/MM/YYYY) into the eCRF into a re-identifiable format (D1, D2) at a system level. The original entered data (DD/MM/YYYY) will only be accessible by the site Research Co-ordinator and the site Principal Investigator using their unique database account details. ***In Australia, re-identifiable data will be entered into a central REDCap database hosted by Monash University and harmonised with the SPRINT-SARI study.***

### Rule of Transfer

It is proposed that if a patient is transferred from a facility participating in ECMOCARD and SPRINT-SARI to another facility that is also participating, the patient's previously allocated patient ID number will be documented in the CRF completed by the receiving hospital at time of admission. All sites participating in SPRINT-SARI will be asked to include a ECMOCARD and SPRINT-SARI study information sheet in the patients transferring documents, notifying the new hospital of the patient's inclusion in ECMOCARD and SPRINT-SARI, the patients re-identifiable participation number, the contact details of the Principle Investigator of ECMOCARD and SPRINT-SARI in the country and the ECMOCARD and SPRINT-SARI coordinating centre. If you are unsure if a patient has previously been enrolled in ECMOCARD and SPRINT-SARI please check to see if the patients transferring hospital and ward/unit are included in the participating sites list on the ECMOCARD and SPRINT-SARI website ([www.sprintsari.org](http://www.sprintsari.org)). Please use the patients existing ECMOCARD and SPRINT-SARI participant number at the new hospital when entering data into the paper and/or eCRF. Sites will not have access to any data collected outside their hospital; it is the responsibility of each hospital to enter data pertaining to their component of the patient's hospital admission. If a patient is transferred to a non-participating hospital, there will be no further data collection.

### International waiver of informed consent

It is expected that this study will not require individual patient consent. This study is in effect a large-scale clinical audit, as all data is already recorded as part of routine clinical care, therefore justifying participant enrolment using a waiver of consent. Waiver of consent may be available for studies that submit only re-identifiable information and where involvement in the research carries no more than low risk. Any location that deems individual consent necessary can use potential forms reported in the Appendix A. In particular, only in

patients who meet the inclusion/exclusion criteria, informed consent will be obtained directly from the patient, either before the study or retrospectively in case the patient is unconscious at the time of enrolment. If the patient is unable to provide a consent form upon admission, informed consent will be obtained by his/her next of kin.

### Informed Consent in Australia

In Australia all patients admitted to the ICU and meeting all inclusion and no exclusion criteria will be included in ECMOCARD observational study. Their hospital data will be included under a waiver of consent, in line with the National Statement (chapter 2.3) and the NHMRC *Ethical Considerations in Quality Assurance and Evaluation Activities, 2014*.

Data for ECMOCARD and SPRINT SARI observational study will be concomitantly collected. In addition, to minimise workload for site staff, whenever possible, EXCEL data will be requested to complement ECMOCARD data. SPRINT-SARI and EXCEL have both been approved to recruit patients under a waiver of consent. Yet, it is important to emphasize that ethics approval certificate for Project 202/16 has the following special condition: "A waiver of the requirement for consent was granted for the collection and use of identifiable information during relevant epidemics and pandemics. An opt-out approach will be used at all other times."

## Data Collection

### ISARIC Data Collection

As detailed in following paragraphs, we will collect data prospectively or retrospectively on patient demographics including age, sex, height, weight, and ethnicity, as well as the presence of predefined comorbidities. **General data will be collected from each site using the SPRINT-SARI data tool, namely the WHO and ISARIC NOVEL CORONAVIRUS (nCoV) ACUTE RESPIRATORY INFECTION CLINICAL CHARACTERISATION (<https://isaric.tghn.org/novel-coronavirus/>)**. As shown in figure 4, SPRINT-SARI data collection will start upon admission to the Hospital. The CRF was assembled by ISARIC members on the basis of the WHO natural history protocol, INFINITE (ANZICS), MOSAIC and others<sup>5,26</sup>. The CRF was assembled to be a basic CRF with the aims of avoiding data duplication, and with the intention of being user friendly and applicable in all settings, regardless of the resources available<sup>27</sup>. The CRF has previously been used in Singapore, New

Zealand, Saudi Arabia, Vietnam, and North America and adapted by a working group for the purposes of this study with ISARIC approval to all changes made. In 2020, with the emergence of the COVID-19 epidemics, the ISARIC CRF eCRF were modified in order to characterize patients with this infection. In addition, Chief Investigators of the ECMOCARD trial further improved the ISARIC CRF eCRF to specifically describe COVID-19 patients admitted to the ICU and undergoing mechanical ventilation and ECMO.

### ECMOCARD Data Collection

Streamlined data-collection instruments and procedures will be used in an attempt to minimise the work in study centres. Specifically, we will collect data on the timing of ICU admission, endotracheal intubation, mechanical ventilation and ECMO commencement in relation to presumed onset of symptoms and hospital admission. We will investigate whether invasive mechanical ventilation and ECMO treatment was commenced in the participating hospital or whether the patient was retrieved and transferred while receiving invasive mechanical ventilation and/or ECMO from a referral centre. Severity of illness before endotracheal intubation and before ECMO will be investigated by respiratory rate, severity of hypoxemia, hypercapnia, non-pulmonary vital organ support, ventilator settings, and use of rescue ARDS therapies in the 12 hours before ECMO commencement. Dynamics of invasive mechanical ventilation and ECMO treatment will be recorded and characterized from commencement of invasive mechanical ventilation up to discontinuation (Figure 4). We will also collect administration of antiviral and antibiotic medications. Finally, duration of mechanical ventilation, ECMO, ICU and hospital stay, ICU and hospital mortality will be documented. In patients who died during hospital admission, we characterized the mode of death from a list of predefined options. ***Of note, In Australian centres, patients enrolled into the study "A comprehensive national registry on the treatment and outcomes of patients requiring ECMO) (EXCEL Study) will be identified by the ECMOCARD eCRF. Likewise, in the EXCEL study eCRF, a specific question will be added to identify patients enrolled in the ECMOCARD. Thus, we will complement ECMOCARD CRF with data collected through the EXCEL study.***



Figure 4

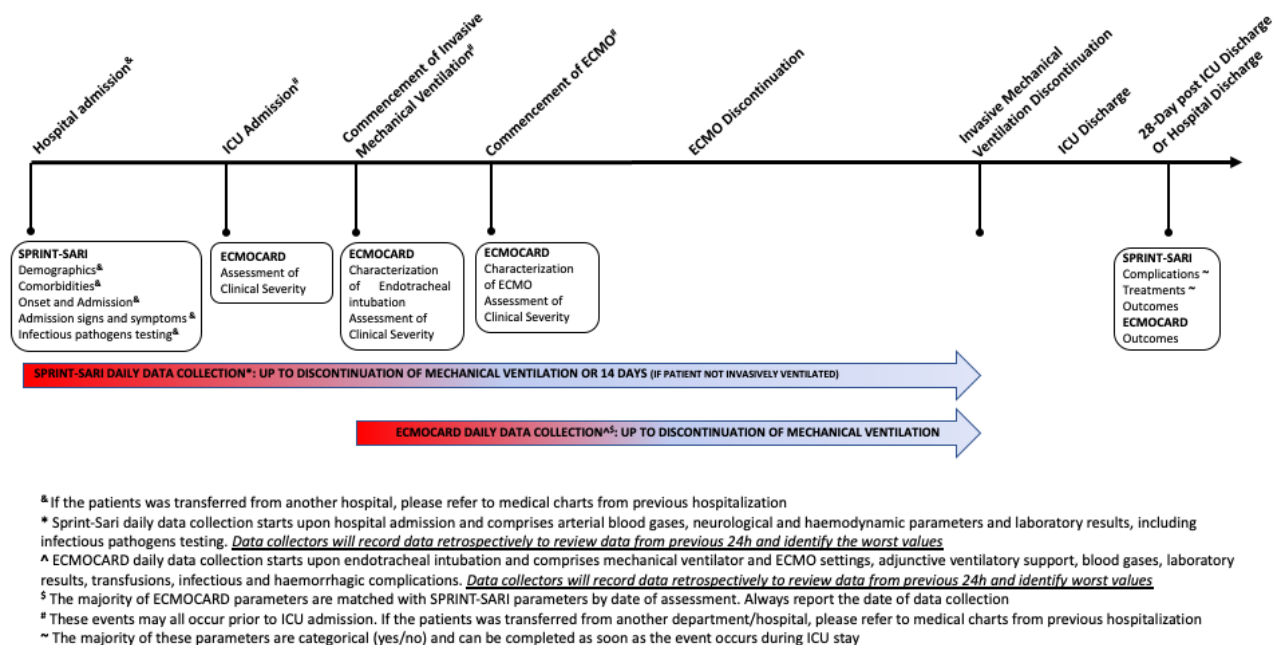

Figure 4 Caption: Follow-up schedule and assessments. ICU, intensive care unit; ECMO, extracorporeal membrane oxygenation.

## Coagulation Disorders and Thrombosis Sub-study Data Collection

In collaborative centres that routinely perform rotational thromboelastometry (ROTEM) or thromboelastography (TEG) in their clinical practice, we will carry out an additional observational sub-study to appraise coagulation disorders and/or pro-thrombotic risks in COVID-19 patients in the ICU. As detailed in following paragraphs, upon admission to ICU, and every 24 hours thereafter, we will collect data prospectively or retrospectively on coagulation disorders and pro-thrombotic risks until discontinuation of mechanical ventilation or in case of patients who are not mechanically ventilated, until 7 days post-ICU discharge. In addition, in centres that routinely use ROTEM, within 1h from a clinically relevant thrombosis/embolism or bleeding event, and 6h prior to commencement of ECMO, we will perform an additional ROTEM assessment to record TRAPTEM AUC, A6 and MS parameters. **Data for the Coagulation Disorders and Thrombosis Sub-study will be collected**

1  
2  
3  
4  
5  
6  
7  
8  
9  
10  
11  
12  
13  
14  
15  
16  
17  
18  
19  
20  
21  
22  
23  
24  
25  
26  
27  
28  
29  
30  
31  
32  
33  
34  
35  
36  
37  
38  
39  
40  
41  
42  
43  
44  
45  
46  
47  
48  
49  
50  
51  
52  
53  
54  
55  
56  
57  
58  
59  
60

*from each collaborating site using the dedicated REDcap CRF, hosted at the University of Queensland.*

### Data collection methods

Each site will have the option to collect data via Option 1 alone **OR** Option 1 +2. The method chosen will be a decision made at a site level. The options for data collection are as follows:

#### OPTION 1: Standard Data Collection

Both the SPRINT-SARI ISARIC and ECMOCARD CRF will be made available at all participating sites as a paper CRF. The SPRINT-SARI ISARIC and ECMOCARD CRFs will be available in a variety of languages and will be translated into languages appropriate for all participating sites. The translation of the paper and electronic CRFs from English into the required language will be the responsibility of the national lead investigators and collaborators of the Critical Care Research group and checked for consistency by an appropriate investigator in the relevant country. All data will be collected by trained staff at each study site and these individuals will enter all required data described in the protocol into the CRFs directly from the source data. Trained staff at sites with the IT capabilities can enter all required data directly into the protected online database, known as the eCRF; paper CRFs are the alternative option for direct data entry with subsequent transcription, upon completion, into the eCRF. Information recorded in the CRF should accurately reflect the participants' medical/hospital notes. The Research Coordinator or Site Investigator will have the ability to choose the process they use to enter data into the eCRF, where data may be entered at one time or intermittently. If used, the original paper based CRF will be stored within a locked office in each study site. The intent of this process is to improve the quality of the clinical study by providing prompt feedback to the Investigators on the progress of the submitted data and to enhance the ability to collect early safety information in a more timely fashion to fully comply with the intent of GCP requirements. ***Data from International countries will be entered into an online eCRF database managed by the Oxford University Clinical Research Unit, Vietnam (OUCRU) for the SPRINT-SARI ISARIC and ECMOCARD tiers. Data from Australia will be entered into an online eCRF database managed by Monash University, and will be complemented with data from SPRINT SARI observational study (ALFRED HREC Reference 202/16) and EXCEL (ALFRED HREC Reference 534/18)).*** In Countries unable to upload data on a centralised database the right to retain a local database on a



national server is available with aggregated completely anonymised data exported centrally for analysis. Each site will be identified via a 3-digit network code, a 3-digit site code, and each patient will be assigned a 4-digit sequential patient code making up the patient ID number at time of originally enrolment in SPRINT- SARI. The site-code will be specified as to whether it is an ICU, hospital ward, or other facility. The site code is obtained by registering on the eCRF, data management system. Patient numbers should be assigned sequentially for each site beginning with 0001. In the case of a single site recruiting patients on different wards, or where it is otherwise difficult to assign sequential numbers, it is acceptable to assign numbers in blocks. Alpha characters can also be used (e.g. Intensive Care Unit will assign A001 onwards, in-patient ward will assign B001 onwards). ***The full patient identification number will therefore be a 10-digit number, with the format of the following: network code - site code – individual patient code [ ][ ][ ]-[ ][ ][ ]-[ ][ ][ ]-[ ][ ][ ](eg. 001-012-0001).*** ***The register of patient names and study numbers will not leave the participating hospital. Access to the data entry system will be protected by username and password.*** Username and password will be assigned during the registration process for individual Research Coordinators or Site Investigators. All electronic data transfer between study site and database will be username and password protected. Each centre will maintain a trial file including a protocol, ethics approval documentation, and paper CRFs. A participant list will be used in each study site to match identifier codes in the database to individual patients in order to record clinical outcomes and supply any missing data points. The Participant List is maintained locally and is not to be transferred to any other location. The Research Coordinator will compile an enrolment log including the patient's name, age, hospital identification number and unique study number. Subsequent data will be identified by the unique study number only. The enrolment log and study data will be kept separately.

## OPTION 2: Interactive augmented data collection

We will use platforms and solutions provided by Amazon to collect data and transfer data into the REDcap web application. Data will be collected through 1) voice commands; 2) digital video monitor interface and 3) through digital transcription of parameters collected via SPRINT-SARI/ECMOCARD paper CRFs. Similar to option 1, only de-identified information will be collected, encrypted and transferred directly to the REDCAP database. No data or

information of any kind will be directed elsewhere. Amazon Web Services will not have any direct interaction with the enhanced user-interface once it is implemented and will only act in an external consultancy capacity. Data will be fully encrypted from data ingestion into Amazon cloud, up to de-encryption into the REDcap web application. Thus Amazon platform will only channel, without being able to codify, data from hospitals into the REDcap system.

### Data collection methods (Coagulation Disorders and Thrombosis sub-study)

As for the Coagulation Disorders and Thrombosis Sub-study, the CRF will be made available at all collaborating sites as a paper CRF. The Coagulation Disorders and Thrombosis Sub-study CRF will be only available in English. Data will be collected by trained staff at each study site and these individuals will enter all required data described in the protocol into the CRFs directly from laboratory results, ROTEM or TEG reports. Trained staff at sites with the IT capabilities can enter all required data directly into the protected online database hosted at UQ, known as the eCRF; paper CRFs are the alternative option for direct data entry with subsequent transcription, upon completion, into the eCRF. Information recorded in the CRF should accurately reflect the participants' laboratory results, ROTEM or TEG reports. The Research Coordinator or Site Investigator will have the ability to choose the process they use to enter data into the eCRF, where data may be entered at one time or intermittently. If used, the original paper based CRF will be stored within a locked office in each study site. The intent of this process is to improve the quality of the clinical study by providing prompt feedback to the Investigators on the progress of the submitted data and to enhance the ability to collect early safety information in a more timely fashion to fully comply with the intent of GCP requirements. **Data will be entered into an online eCRF database managed by the University of Queensland.** In Countries unable to upload data on a centralised database the right to retain a local database on a national server is available with aggregated completely anonymised data exported centrally for analysis. **The full patient SPRINT-SARI/ECMOCARD identification number will be recorded to match results of the Coagulation Disorders and Thrombosis Sub-study with SPRINT-SARI/ECMOCARD records. The register of patient names and study numbers will not leave the participating hospital. Access to the data entry system will be protected by username and password.** Username and password will be assigned by the University of Queensland during the registration process for individual Research Coordinators or Site Investigators. All electronic data transfer between study site and

1  
2  
3 database will be username and password protected. The Participant List of the Coagulation  
4 Disorders and Thrombosis Sub-study is maintained locally and is not to be transferred to any  
5 other location.  
6  
7

### 8 9 Screening log

10 No screening log will be maintained.

### 11 12 Data quality

13 Several procedures to ensure data quality and protocol standardisation will help to  
14 minimise bias. These include:

- 15 1. Online meetings for all research coordinators will be held to ensure consistency in  
16 procedures;
- 17 2. A detailed data dictionary will define the data to be collected on the case report form;
- 18 3. Quality checks will be built into the data management system and there will be quality  
19 checks of critical data points entered into the CRFs to ensure standardization and  
20 validity of the data collected;

21 An achievable data set will be fundamental to the success of the study. We have identified  
22 the key data points whilst not discouraging centres from participating through an excessive  
23 burden of data collection. Data queries may be generated, depending on resource availability.  
24 Any information that is not available for the investigator will not be considered as missing. No  
25 assumptions will be made for missing data.  
26  
27

### 28 29 Data management

30 Data entry and data management will be coordinated by ISARIC and ECMOCARD  
31 steering committee, including programming and data management support. On behalf of the  
32 management committee, ANZIC-RC and ISARIC will act as custodian of the data. The  
33 University of Queensland will receive data from the data custodians via data sharing  
34 agreements. The management committee of the trial will take responsibility for the content  
35 and integrity of any data. There will be periodic assessments of data burden to ensure that  
36 the infrastructure is organized to handle large amounts of incoming data in small time  
37 periods. SPRINT-SARI and ECMOCARD will adhere to the research and data sharing policies of  
38 ISARIC, Sample and Data Sharing Policy, Version 4, 21 July 2014. ***Clinical investigators  
39 contributing to the research efforts will be given full recognition for their efforts and will be***  
40  
41  
42  
43  
44  
45  
46  
47  
48  
49  
50  
51  
52  
53  
54  
55  
56  
57  
58  
59  
60

**given the opportunity to access data. Ownership of any data transferred to the eCRF will be retained by the site that contributed it.** Networks will retain the right to request raw data for all sites included in their network for research purposes, provided that the research proposal has been reviewed and approved by the management committee, ISARIC and ECMOCARD following publication of the primary manuscript. All analysis of pooled data will be undertaken with the explicit agreement of each site who contributed. ISARIC and ECMOCARD will retain the right to use all pooled data for scientific and other purposes. All members of the study group will have the right to access the pooled data for research purposes provided the research proposal has been reviewed and deemed satisfactory by the management committee following publication of the primary manuscript. Only summary data will be presented publicly. Individual patient data provided by participating sites will remain the property of the respective institution. Of note, a data management plan will be developed to address researchers' intentions related to generation, collection, access, use, analysis, disclosure, storage, retention, disposal, sharing and re-use of data and information, the risks associated with these activities and any strategies for minimising those risks.

## Monitoring

Data monitoring will be conducted on a randomly selected subset (up to 5%) of cases, through discussion with the local site investigator to discuss data collection techniques. Direct site visits will not be feasible, given the scope of the study.

## Collected Parameters

The following parameters will be assessed and recorded based on the follow-up schedule and assessments reported in Figure 4. All the mandatory variables to be assessed are highlighted in red:

### Demographics and Medical History

1. Personal Data
2. Medical History and comorbidities, including type of anti-hypertensive medications
3. Smoking habits
4. Chronic alcohol abuse
5. Intravenous drug abuse
6. Immuno-competency status

## COVID-19 infection

1. Date of first signs of infection
2. Date of hospital admission
3. Date of ICU admission
4. Date of invasive mechanical ventilation
5. Blood gases before commencement of invasive mechanical ventilation
6. Use of continuous renal replacement therapy before commencement of invasive mechanical ventilation
7. Use of vasoactive drugs before commencement of invasive mechanical ventilation
8. Use of cardiac-assist devices before commencement of invasive mechanical ventilation
9. Acute physiology and chronic health evaluation (APACHE II) score upon ICU admission
10. Use of anti-viral treatment
11. Use of antibiotics
12. Cutaneous manifestations

## Clinical parameters upon commencement of invasive mechanical ventilation

1. Date of invasive mechanical ventilation commencement
2. Use of prone position
3. Use of neuromuscular blockade
4. Use of recruitment manoeuvres
5. Use of inhaled nitric oxide
6. Use of bicarbonate
7. Blood gases
8. Ventilatory mode
9. Inspiratory fraction of oxygen
10. Respiratory rate
11. Tidal volume (ml/Kg of ideal body weight)
12. Positive end-expiratory pressure
13. Airway plateau pressure

## Daily assessment of clinical parameters during invasive mechanical ventilation

1. Date of assessment

2. Use of prone position
3. Use of neuromuscular blockade
4. Use of recruitment manoeuvres
5. Use of inhaled nitric oxide
6. Blood gases
7. Ventilatory mode
8. Inspiratory fraction of oxygen
9. Respiratory rate
10. Tidal volume (ml/Kg of ideal body weight)
11. Positive end-expiratory pressure
12. Airway plateau pressure
13. Haemoglobin
14. White blood cells
15. AST
16. ALT
17. Lactate
18. Creatinine
19. Ferritin
20. D-dimer
21. Troponins
22. BNP
23. Use of continuous renal replacement therapy
24. Use of vasoactive drugs
25. Use of anticoagulants
26. Transfused blood products
27. Infectious complications
28. Haemorrhagic complications

#### Clinical features before commencement of ECMO

1. Date of ECMO commencement
2. Use of prone position
3. Use of neuromuscular blockade



4. Use of recruitment manoeuvres
5. Use of inhaled nitric oxide
6. Use of bicarbonate
7. Blood gases
8. Ventilatory mode
9. Inspiratory fraction of oxygen
10. Respiratory rate
11. Tidal volume (ml/Kg of ideal body weight)
12. Positive end-expiratory pressure
13. Airway plateau pressure

#### ECMO characteristics

1. Type and manufacturer of centrifugal blood pump driven circuit
2. Type and manufacturer of low-resistance oxygenator
3. Type of ECMO: venous-venous or venous-arterial
4. Peripheral access: femoral, jugular, both
5. ECMO blood flow rate day 0, and every 24 hours thereafter
6. ECMO gas flow rate day 0, and every 24 hours thereafter
7. Anticoagulation during ECMO
8. Frequency of ECMO circuit change
9. Ventilatory settings on ECMO
10. Vasoactive support on ECMO
11. Organ dysfunctions on ECMO

#### ECMO adverse effects

1. Transfused blood during ECMO
2. Transfused plasma during ECMO
3. Transfused platelets during ECMO
4. Transfused cryoprecipitates during ECMO
5. Type and source of infectious complications
6. Type and source of haemorrhagic complications
7. Other complications



ECMO adverse effects

1. Transfused blood during ECMO
2. Transfused plasma during ECMO
3. Transfused platelets during ECMO
4. Transfused cryoprecipitates during ECMO
5. Type and source of infectious complications
6. Type and source of haemorrhagic complications
7. Other complications

Daily assessments for Coagulation Disorders and Thrombosis Sub-study

1. SPRINT-SARI/ECMOCARD patient number
2. Date of assessment
3. Lactate dehydrogenase
4. Ferritin
5. D-dimer
6. Fibrinogen
7. Activated clotting time
8. Activated partial thromboplastin time
9. International normalised ration
10. Plasma free haemoglobin
11. ROTEM parameters (EXTEM, FIBTEM, INTEM, HEPTTEM, TRAPTEM, NATEM if patients undergoing treatment with low molecular weight heparin and ECATEM if patients undergoing treatment with direct thrombin inhibitors)
12. TEG parameters

Main outcomes

1. Date of ECMO discontinuation
2. Date of invasive mechanical ventilation discontinuation
3. Date of ICU Discharge
4. Date of Hospital Discharge
5. Mortality at 28 days
6. Main cause of death

## Data Analysis

The global analysis of SPRINT-SARI/ECMOCARD and Coagulation Disorders and Thrombosis Sub-study categorical variables will be described as proportions and will be compared using chi-square or Fisher’s exact test. Continuous variables will be described as mean and standard deviation if normally distributed or median and inter-quartile range if not normally distributed. Comparisons of continuous variables will be performed using one-way ANOVA or Mann-Whitney test, as appropriate. A logistic regression model will be performed to assess independent association between prognostic factors and outcomes, taking into account the hierarchical nature of the data. Significance will be set at  $p < 0.05$ .

For peer review only

## Reference List

1. Bolotin S, Pebody R, White PJ, et al. A new sentinel surveillance system for severe influenza in England shows a shift in age distribution of hospitalised cases in the post-pandemic period. *PLoS One*. 2012;7(1). doi:10.1371/journal.pone.0030279
2. Dawood FS, Iuliano AD, Reed C, et al. Estimated global mortality associated with the first 12 months of 2009 pandemic influenza A H1N1 virus circulation: A modelling study. *Lancet Infect Dis*. 2012;12(9):687-695. doi:10.1016/S1473-3099(12)70121-4
3. Simonsen L, Spreeuwenberg P, Lustig R, et al. Global Mortality Estimates for the 2009 Influenza Pandemic from the GLaMOR Project: A Modeling Study. *PLoS Med*. 2013;10(11). doi:10.1371/journal.pmed.1001558
4. Huang QS, Baker M, McArthur C, et al. Implementing hospital-based surveillance for severe acute respiratory infections caused by influenza and other respiratory pathogens in New Zealand. *West Pacific Surveill response J WPSAR*. 2014;5(2):23-30. doi:10.5365/WPSAR.2014.5.1.004
5. Critical Care Services and 2009 H1N1 Influenza in Australia and New Zealand. *N Engl J Med*. 2009;361(20):1925-1934. doi:10.1056/NEJMoa0908481
6. Guery B, Poissy J, El Mansouf L, et al. Clinical features and viral diagnosis of two cases of infection with Middle East Respiratory Syndrome coronavirus: A report of nosocomial transmission. *Lancet*. 2013;381(9885):2265-2272. doi:10.1016/S0140-6736(13)60982-4
7. Weiss SR, Navas-Martin S. Coronavirus Pathogenesis and the Emerging Pathogen Severe Acute Respiratory Syndrome Coronavirus. *Microbiol Mol Biol Rev*. 2005;69(4):635-664. doi:10.1128/mmb.69.4.635-664.2005
8. Drosten C, Günther S, Preiser W, et al. Identification of a Novel Coronavirus in Patients with Severe Acute Respiratory Syndrome. *N Engl J Med*. 2003;348(20):1967-1976. doi:10.1056/NEJMoa030747
9. Ksiazek TG, Erdman D, Goldsmith CS, et al. A Novel Coronavirus Associated with Severe Acute Respiratory Syndrome. *N Engl J Med*. 2003;348(20):1953-1966. doi:10.1056/NEJMoa030781
10. Zaki AM, Van Boheemen S, Bestebroer TM, Osterhaus ADME, Fouchier RAM. Isolation of a novel coronavirus from a man with pneumonia in Saudi Arabia. *N Engl J Med*.

- 2012;367(19):1814-1820. doi:10.1056/NEJMoa1211721
11. de Groot RJ, Baker SC, Baric RS, et al. Middle East Respiratory Syndrome Coronavirus (MERS-CoV): Announcement of the Coronavirus Study Group. *J Virol.* 2013;87(14):7790-7792. doi:10.1128/jvi.01244-13
  12. WHO | Summary of probable SARS cases with onset of illness from 1 November 2002 to 31 July 2003. *WHO.* 2015.
  13. WHO | Middle East respiratory syndrome coronavirus (MERS-CoV). *WHO.* 2020.
  14. Chan JF-W, Yuan S, Kok K-H, et al. A familial cluster of pneumonia associated with the 2019 novel coronavirus indicating person-to-person transmission: a study of a family cluster. *Lancet.* January 2020. doi:10.1016/S0140-6736(20)30154-9
  15. Zhu N, Zhang D, Wang W, et al. A Novel Coronavirus from Patients with Pneumonia in China, 2019. *N Engl J Med.* January 2020:NEJMoa2001017. doi:10.1056/NEJMoa2001017
  16. WHO | Novel Coronavirus – Thailand (ex-China). *WHO.* 2020.
  17. WHO | Novel Coronavirus – Japan (ex-China). *WHO.* 2020.
  18. WHO | Novel Coronavirus – Republic of Korea (ex-China). *WHO.* 2020.
  19. Spina S, Marrazzo F, Migliari M, Stucchi R, Sforza A, Fumagalli R. The response of Milan's Emergency Medical System to the COVID-19 outbreak in Italy. *Lancet (London, England).* 2020;0(0). doi:10.1016/S0140-6736(20)30493-1
  20. Ebrahim SH, Memish ZA. COVID-19: preparing for superspreader potential among Umrah pilgrims to Saudi Arabia. *Lancet.* 2020;0(0). doi:10.1016/S0140-6736(20)30466-9
  21. Holshue ML, DeBolt C, Lindquist S, et al. First Case of 2019 Novel Coronavirus in the United States. *N Engl J Med.* January 2020. doi:10.1056/nejmoa2001191
  22. Sun K, Chen J, Viboud C. Early epidemiological analysis of the coronavirus disease 2019 outbreak based on crowdsourced data: a population-level observational study. *Lancet Digit Heal.* 2020;0(0). doi:10.1016/S2589-7500(20)30026-1
  23. Huang C, Wang Y, Li X, et al. Clinical features of patients infected with 2019 novel coronavirus in Wuhan, China. *Lancet.* January 2020. doi:10.1016/S0140-6736(20)30183-5
  24. Shi H, Han X, Jiang N, et al. Radiological findings from 81 patients with COVID-19

pneumonia in Wuhan, China: a descriptive study. *Lancet Infect Dis.* 2020;0(0).  
doi:10.1016/S1473-3099(20)30086-4

25. Wang D, Hu B, Hu C, et al. Clinical Characteristics of 138 Hospitalized Patients With  
2019 Novel Coronavirus-Infected Pneumonia in Wuhan, China. *JAMA.* February 2020.  
doi:10.1001/jama.2020.1585
26. André T, Boni C, Mounedji-Boudiaf L, et al. Oxaliplatin, fluorouracil, and leucovorin as  
adjuvant treatment for colon cancer. *N Engl J Med.* 2004;350(23):2343-2351.  
doi:10.1056/NEJMoa032709
27. Dunning JW, Merson L, Rohde GGU, et al. Open source clinical science for emerging  
infections. *Lancet Infect Dis.* 2014;14(1):8-9. doi:10.1016/S1473-3099(13)70327-X

## Regulation, Ethics and Governance

Protocol and any following amendment to the original protocol will be translated to the main language of the collaborative institution and submitted for the approval of each institutional review board (IRB). All protocols of the study will require approval by each institutional review board, before enrolment of patients. Sites should apply for a waiver of consent to be granted given the negligible risk nature of the study and the need for rapid data collection to inform pandemic responses globally.

### Conflict of interest

The investigators of the APELSON network DO NOT have any significant financial or personal interest that would reasonably appear to be affected by the proposed research activities.

### Data collection and Site Monitoring plan

#### Data Collection

Data will be collected in dedicated electronic forms and/or hard copies as provided by the SPRINT-SARI and ISARIC Organisations (APPENDIX B) and the ECMOCARD Steering Committee (APPENDIX C). Data for Coagulation Disorders and Thrombosis Sub-study can be found in the APPENDIX D. A custom-designed electronic case report form has been developed in REDcap, which is hosted at the University of Oxford and for all Australian centres will be hosted at Monash University, Melbourne, Australia. A custom-designed electronic case report form has been developed in REDcap for the Coagulation Disorders and Thrombosis Sub-study, which is hosted at the University of Queensland. Hard copies and electronic data will be kept for at least 7 years following the conclusion of the study. Each investigator will be responsible to collect and preserve data obtained at his/her collaborative institution.

#### Site Monitoring

Periodic conference calls will be organized with all investigators or investigators of specific collaborative centres to monitor the quality of the data collected, address specific issues in data collection and prepare future publications

#### Compensations

No compensation will be offered to collaborating institutions.



## Data Access

All essential documentation of the SPRINT-SARI/ECMOCARD and the Coagulation Disorders and Thrombosis Sub-study will be stored in an Investigator Study File (ISF), which will be held by the Critical Care Research Group (CCRG), University of Queensland. On completion of the study, this information will be archived by the CCRG. Following the publication of the primary and secondary outcomes, additional analyses could be undergone on the data collected. In the event of publications arising from these analyses, those responsible will need to provide the Chief Investigator with a copy of the manuscript for approval prior to submission.

## Feasibility

This is a multi-centre study performed within the COVID-19 Critical Care Consortium, which comprises the SPRINT-SARI, ISARIC, ELSO and APELSON networks of clinical research institutions, during an emergent new respiratory infection caused by the new COVID-19 virus. The study will be conducted in intensive care units with broad experience in mechanical ventilation, ECMO and coagulation disorders and thrombosis. Further intra-mural and extra-mural collaborations beyond the COVID-19 Critical Care Consortium and SPRINT-SARI, ISARIC and APELSON networks will be potentially pursued to promptly achieve goals. In summary, the COVID-19 Critical Care Consortium multidisciplinary and international research team of collaborators provides ideal conditions to perform reported study.

## Dissemination and Publication

### Publication policy

Ownership of the data arising from the study resides with the study teams. Data requested from SPRINT-SARI and EXCEL investigators will reside with their own study teams. After the study, results will be analysed and tabulated, and a study report will be prepared. This report will be made available to the study collaborators and the relevant IRBs. The study findings will be presented at national and international meetings. We plan to publish our study findings in a high-quality peer reviewed journal. SPRINT-SARI and EXCEL studies will be fully acknowledged in all publications and presentations.



### Authorship policy

Authorship will be determined according to the internationally agreed criteria for authorship ([www.icmje.org](http://www.icmje.org)). Authorship of parallel studies conducted outside of the main trial will be according to the individuals involved in the study but must acknowledge the contribution of the involved investigators.

For peer review only

1  
2  
3  
4  
5  
6  
7  
8  
9  
10  
11  
12  
13  
14  
15  
16  
17  
18  
19  
20  
21  
22  
23  
24  
25  
26  
27  
28  
29  
30  
31  
32  
33  
34  
35  
36  
37  
38  
39  
40  
41  
42  
43  
44  
45  
46  
47  
48  
49  
50  
51  
52  
53  
54  
55  
56  
57  
58  
59  
60

**SUPPLEMENT 2**

**COLLABORATING SITES**

## COLLABORATING SITES

| Country   | City                              | Site Name                          | Principal Investigator     |
|-----------|-----------------------------------|------------------------------------|----------------------------|
| Australia | Brisbane                          | The Prince Charles Hospital        | Kiran Shekar               |
|           | Melbourne                         | The Alfred Hospital                | Carol Hodgson              |
|           | Gold Coast                        | Gold Coast University Hospital     | James Winearls             |
|           | South Brisbane                    | Princess Alexandra Hospital        | James Walsham              |
|           |                                   | Queensland Children's Hospital     | Adrian Mattke              |
|           | Canberra                          | Canberra Hospital                  | Hemanth Hurkadli Veerendra |
|           | Perth                             | Perth Children's Hospital          | Simon Erickson             |
|           | Sydney                            | St Vincent's Hospital              | Hergen Buscher             |
|           |                                   | Royal North Shore Hospital         | Perre Janin                |
|           |                                   | Westmead Hospital                  | Benjamin Davidson          |
|           |                                   | Prince of Wales Hospital           | Gavin Salt                 |
|           |                                   | St George Hospital                 | Swapnil Pawar              |
|           |                                   |                                    | Andrew Cheng               |
|           |                                   | Royal Prince Alfred Hospital       | Richard Totaro             |
|           |                                   | Nepean Hospital                    | Ian Mark Seppelt           |
|           | Newcastle                         | John Hunter Hospital               | Jorge Brieva               |
|           | Melbourne                         | Box Hill Hospital                  | Diarmuid O'Briain          |
|           | Geelong                           | Geelong Hospital                   | Joseph McCaffrey           |
|           | Hervey Bay                        | Hervey Bay Hospital (Wide Bay HHS) | Angela Ratsch              |
| Bundaberg | Bundaberg Hospital (Wide Bay HHS) | Angela Ratsch                      |                            |
| Adelaide  | Royal Adelaide Hospital           | Michael Farquharson                |                            |

|                    |                                                     |                                             |                                    |
|--------------------|-----------------------------------------------------|---------------------------------------------|------------------------------------|
|                    | Caboolture                                          | Caboolture Hospital                         | Mahesh Ramanan                     |
|                    | Redcliffe                                           | Redcliffe Hospital                          | Alexis Tabah                       |
|                    | Rockhampton                                         | Rockhampton Hospital                        | Antony Attokaran                   |
|                    | Launceston                                          | Launceston General Hospital                 | Matt Brain                         |
|                    | Melbourne                                           | Royal Children's Hospital                   | Warwick Butt                       |
| <b>New Zealand</b> | Auckland                                            | Auckland City Hospital                      | Shay McGuinness (CVICU)            |
| <b>Hong Kong</b>   | Hong Kong                                           | Tuen Mun Hospital                           | Kenny Chan King-Chung              |
|                    |                                                     | Princess Margaret Hospital                  | Dominic So                         |
|                    |                                                     | Queen Mary Hospital                         | Pauline Yeung, Simon Wai Ching Sin |
|                    |                                                     | Queen Elizabeth Hospital                    | George Ng                          |
|                    |                                                     | Pamela Youde Nethersole Eastern Hospital    | Hoi Ping Shum                      |
| <b>Indonesia</b>   | Jakarta                                             | National Cardiovascular Center Harapan Kita | Eva Marwali                        |
|                    |                                                     | Sulianti Saroso Hospital                    | Surya Oto Wijaya                   |
|                    |                                                     | Persahabatan Hospital                       | Erlina Burhan                      |
|                    |                                                     | Pelni Hospital                              | Amelya Hutahaean                   |
|                    |                                                     | Fatmawati Hospital                          | Azhari Taufik                      |
|                    |                                                     | Cipto Mangunkusumo Hospital                 | Yogi Prawira (Paeds)               |
|                    |                                                     |                                             | Dr Anas Alatas (Adult)             |
|                    |                                                     | Cengkareng Hospital                         | Dr Kamal                           |
|                    | Sanglah General Hospital                            | Dr. Sajinadiyasa (adult)                    |                                    |
|                    |                                                     | Dyah Kanya Wati (pead)                      |                                    |
| East Java          | Soetomo Hospital, Surabaya                          | Neurinda Permata Kusumastuti                |                                    |
|                    | Saiful Anwar Malang Hospital (Brawijaya University) | Dr Saptadi Yularito                         |                                    |

|              |                  |                                              |                                                          |
|--------------|------------------|----------------------------------------------|----------------------------------------------------------|
|              | West Java        | Hasan Sadikin Hospital                       | Gezy Giwangkancana (Adult)<br>Dadang H Somasetia (Paeds) |
|              | Surabaya         | Airlanna University                          | Dr Neurinda Permata Kusumastuti                          |
|              | Medan            | Adam Malik Hospital                          | Bastian Lubis                                            |
|              | Semarang         | Dr Kariadi Hospital Semarang                 | Moh Supriatna                                            |
|              | Yogyakarta       | Sardjito Hospital                            | Desy Rusmawatingtyas (Paeds)<br>Dr. Bhirowo (Adult)      |
| <b>Japan</b> | Sapporo          | Teine Keijinkai Hospital                     | Takako Akimoto                                           |
|              | Tokyo            | Nippon Medical School Hospital               | Singo Ichiba                                             |
|              | Kawasaki         | St Marianna Medical University Hospital      | Shigeki Fujitani (Adults)<br>Shimizu Naoki (Paeds)       |
|              | Utsunomiya       | Saiseikai Utsunomiya Hospital                | Keibun Liu                                               |
|              | Hokkaido         | Hokkaido University                          | Dr Koji Hoshino<br>Dr Yuk Uchinami                       |
|              | Kyoto            | Kyoto Medical Centre                         | Hiro Tanaka                                              |
|              | Yokohama         | Yokohama City University Medical Center      | Hayato Taniguci                                          |
|              | Aichi            | Tosei Hospital                               | Dr Yokoyama                                              |
|              | Maebashi         | Japan Red Cross Maebashi Hospital            | Hiroyuki Suzuki                                          |
|              | Gunma            | Gunma University Graduate School of Medicine | Kanamoto Masafumi                                        |
|              | Chiba            | Chiba University Graduate School of Medicine | Ryuzo Abe                                                |
|              | Hiroshima        | Hiroshima University                         | Shinichiro Ohshimo                                       |
|              | Tokyo            | Tokyo Metropolitan Medical Center            | Keiki Shimizu                                            |
|              | Hakodate         | Hakodate City hospital                       | Yoshihiro Takeyama                                       |
| Ryukyo       | Ryukyu Univesity | Ichiro Kukita                                |                                                          |

|                  |           |                                                                           |                    |
|------------------|-----------|---------------------------------------------------------------------------|--------------------|
|                  | Yokohama  | Saiseikai Yokohamashi Tobu Hospital                                       | Kenji Tamai        |
|                  | Okayama   | Okayama University Hospital                                               | Toshiyuki Aokage   |
|                  | Miyagi    | Tohoku Medical and pharmaceutical university                              | Tomoyuki Endo      |
|                  | Osaka     | Rinku general medical center (and Senshu trauma and critical care center) | Shingo Adachi (PI) |
|                  |           |                                                                           | Shota Nakao        |
|                  | Kuysu     | Fukuoka University                                                        | Kota Hoshino       |
|                  | Kyoto     | Kyoto Prefectural University of Medicine                                  | Satoru Hashimoto   |
|                  | Osaka     | Osaka City General Hospital                                               | Kazuaki Shigemitsu |
|                  | Chiba     | Kimitsu Chuo Hospital                                                     | Shinya Kitamura    |
|                  |           |                                                                           | Takashi Shimazui   |
|                  | Sapporo   | KKR Medical center                                                        | Masahiro Yamane    |
|                  | Hyogo     | Hyogo Prefectural Kakogawa Medical Center                                 | Akihiro Shimizu    |
|                  | Hyogo     | Hyogo Prefectural Kobe Children's Hospital                                | Hiroshi Kurosawa   |
|                  | Nagoya    | Nagoya University Graduate School of Medicine                             | Kasugai Daisuke    |
|                  | Mie       | Mie University Hospital                                                   | Asami Ito          |
|                  | Fujieda   | Fujieda Municipal General Hospital                                        | Motohiro Asaki     |
|                  | Osaka     | Saiseikai Senri Hospital                                                  | Masahiro Fukuda    |
|                  | Shimane   | Shimane University Hospital                                               | Yoshiaki Iwashita  |
|                  | Osaka     | National Cerebral and Cardiovascular Center                               | Dr. Koji Iihara    |
|                  | Miyagi    | Tohoku Medical and Pharmaceutical University                              | Tomoyuki Endo      |
| <b>Singapore</b> | Singapore | National Centre for Infectious Diseases                                   | Sennen Low         |
|                  |           |                                                                           | Shawn Vasoo        |
|                  |           | Tan Tock Seng Hospital                                                    | Chia Yew Woon      |
|                  |           |                                                                           | Benjamin Ho        |

|             |                  |                                                           |                                                  |                      |
|-------------|------------------|-----------------------------------------------------------|--------------------------------------------------|----------------------|
|             |                  | National University Hospital                              | Kollengode Ramanathan                            |                      |
|             |                  | KK Women's and Children's Hospital                        | Yee Hui Mok                                      |                      |
| South Korea | Gwangju          | Chonnam National University Hospital                      | Hwa Jin Cho                                      |                      |
|             |                  |                                                           | In Seok Jeong                                    |                      |
|             | Anyang           | Hallym University Sacred Heart Hospital                   | Sunghoon Park                                    |                      |
|             | Cheongju         | Chungbuk National University Hospital                     | Hye Won Jeong                                    |                      |
|             |                  |                                                           |                                                  |                      |
|             | Daegu            | Kyungbuk National University Hospital                     | Tak-hyuck Oh                                     |                      |
|             |                  |                                                           | Keimyung University Dong San Hospital            | Jae Burm Kim         |
|             | Seoul            | The Catholic University of Seoul St Mary Hospital         | Hyun Mi Kang                                     |                      |
|             |                  |                                                           | Seoul National University Children's Hospital    | Bongjin Lee          |
|             |                  |                                                           | Anam Korea University Hospital                   | Jae-Seung Jung       |
|             |                  |                                                           | Severance Hospital                               | Su Hwan Lee          |
|             |                  |                                                           | Seoul national university hospital               | Sang Min Lee         |
|             |                  | Seoul National University Bundang Hospital                | Young-Jae Cho                                    |                      |
| Taiwan      | Taipei           | National Taiwan University Hospital                       | Yih-Sharng Chen, Jung-Yien Chien, Chih-Hsieh     |                      |
| Thailand    | Bangkok          | Siriraj Hospital                                          | Pranya Sakiyalak                                 |                      |
| Vietnam     | Ho Chi Minh City | Hospital for Tropical Diseases                            | Trieu Huynh Trung                                |                      |
|             |                  |                                                           | Thuy Duong Bick                                  |                      |
| Italy       | Milan            | Fondazione IRCCS Ca' Granda Ospedale Maggiore Policlinico | Mauro Panigada                                   |                      |
|             |                  |                                                           | Antonio Pesenti                                  |                      |
|             | Rome             | Ospedale San Paolo                                        | Children's Hospital Bambino Gesù                 | Matteo Di Nardo      |
|             |                  |                                                           | Policlinico Umberto, Sapienza University of Rome | Francesco Alessandri |



|     |               |                                                             |                                                               |
|-----|---------------|-------------------------------------------------------------|---------------------------------------------------------------|
|     | Bologna       | Policlinico di S. Orsola, Università di Bologna             | Antonio Loforte                                               |
|     | Bergamo       | Bergamo Hospital                                            | Lorenzo Grazioli and Prof Lorini                              |
|     | Rome          | Fondazione Policlinico Universitario Agostino Gemelli IRCCS | Massimo Antonelli and Domenico Grieco                         |
|     | Genoa         | Ospedale Gaslini                                            | Andrea Moscatelli                                             |
|     |               | San Martino Hospital                                        | Paolo Pelosi                                                  |
|     | Parma         | Azienda Ospedaliero Universitaria Parma                     | Denise Battaglini                                             |
|     |               |                                                             | Sandra Rossi Marta                                            |
|     | Turin         | Le Molinette Hospital (Ospedale Molinette Torino)           | Velia Antonini                                                |
|     |               |                                                             | Luca Brazzi                                                   |
|     | Palermo       | ISMETT                                                      | Gabriele Sales                                                |
|     |               |                                                             | Antonio Arcadipane                                            |
|     | Florence      | Careggi Hospital                                            | Adriano Peris                                                 |
|     | Pisa          | Azienda Ospedaliero Universitaria Pisana                    | Fabio Guarracino                                              |
|     | Verona        | Verona Integrated University Hospital                       | Katia Donadello                                               |
|     | Padua         | Padua University Hospital (Policlinico of Padova)           | Andrea Dellamore and Paolo Navales                            |
|     | Trento        | Ospedale di Arco (Trento hospital)                          | MARCO Cavana and Alberto Cucino                               |
|     | Monza         | Ospedale San Gerardo                                        | Marco Giani                                                   |
|     | Borgo         | Borgo San Lorenzo Hospital                                  | Vieri Parrini                                                 |
| USA | New York City | Columbia University Medical Centre                          | Dan Brodie                                                    |
|     |               |                                                             | Alexis Serra                                                  |
|     |               |                                                             | Darryl Abrams                                                 |
|     | Los Angeles   | Northwell Health                                            | Effe Mihelis                                                  |
|     |               |                                                             | Presbyterian Hospital, New York/ Weill Cornell Medical Centre |
|     | Los Angeles   | Cedars-Sinai Medical Centre                                 | Dominic Emerson                                               |

|  |              |                                                                      |                  |
|--|--------------|----------------------------------------------------------------------|------------------|
|  |              | Ochsner LSA Health Shreveport                                        | Kristi Lofton    |
|  |              | Children's Hospital                                                  | Kimberly Kyle    |
|  |              | UCLA Medical Centre (Ronald Regan)                                   | Vadim Gudzenko   |
|  | Virginia     | Carilion Clinic                                                      | Mark Joseph      |
|  |              | INOVA Fairfax Hospital                                               | Steven Nathan    |
|  | Arizona      | Dignity Health St. Joseph's Hospital and Medical Center (SJHMC)      | Rajat Walia      |
|  | Albuquerque  | Presbyterian Hospital Services, Albuquerque                          | Irfan Khan       |
|  | San Diego    | University of California at San Diego                                | Cassia Yi        |
|  |              | Scripps Memorial Hospital La Jolla                                   | Scott McCaul     |
|  | Newark       | Christiana Care Health System's Centre for Heart and Vascular Health | Ray A Blackwell  |
|  | Santa Cruz   | Dignity Health Medical Group- Dominican                              | Marsha Moreno    |
|  | Florida      | Cleveland Clinic                                                     | Nicolas Brozzi   |
|  |              | University of Florida                                                | Giles John Peek  |
|  | St Louis     | Washington University in St. Louis/ Barnes Jewish Hospital           | Christy Kay      |
|  | Pittsburgh   | University of Pittsburgh Medical Centre                              | Raj Padmanabhan  |
|  | Omaha        | University of Nebraska Medical Centre                                | Lace Sindt       |
|  | Louisville   | Norton Children's Hospital                                           | Teka Siebenaler  |
|  |              | Baptist Health Louisville                                            | Emily Coxon      |
|  | Columbia     | University of South Carolina                                         | Luca Paoletti    |
|  |              |                                                                      | Laura Hollinger  |
|  | Indianapolis | Peyton Manning Children's Hospital                                   | Kay A Sighting   |
|  | Buffalo      | Mercy Hospital of Buffalo                                            | Harsh Jain       |
|  | Indiana      | Indiana University Health                                            | Juan Salgado     |
|  | Washington   | George Washington University Hospital                                | Elizabeth Pocock |

|    |                |                                                                      |                      |
|----|----------------|----------------------------------------------------------------------|----------------------|
| 1  | Washington     | MedStar Washington Hospital Centre                                   | Akram Zaaqoq         |
| 2  | Cincinnati     | University of Cincinnati Medical Centre                              | Suzanne Bennett      |
| 3  | Irvine         | University of California, Irvine                                     | Jennifer Elia        |
| 4  | Salt Lake City | University of Utah Hospital                                          | Matthew Griffiee     |
| 5  | Durham         | Duke University Hospital                                             | Melissa Williams     |
| 6  | Cincinnati     | The Christ Hospital                                                  | Timothy Smith        |
| 7  | Cleveland      | University Hospital Cleveland Medical Centre (UH Cleveland hospital) | Colin McCloskey      |
| 8  | Hartford       | Hartford Healthcare                                                  | Ethan Kurtzman       |
| 9  | Atlanta        | Emory University Healthcare System                                   | Gabrielle Ragazzo    |
| 10 | Atlanta        | Children's Healthcare of Atlanta- Egleston Hospital                  | Micheal Heard        |
| 11 | Stanford       | Stanford University Hospital                                         | Clark Owyang         |
| 12 | Hershey        | Penn State Heath S. Hershey Medical Centre                           | Holly Roush          |
| 13 | Pittsburgh     | Allegheny General Hospital                                           | Subbarao Elapavaluru |
| 14 | Colorado       | Billings Clinic                                                      | Daniel Loverde D.O   |
| 15 | Boston         | Massachusetts General Hospital                                       | Lorenzo Berra        |
| 16 |                |                                                                      | Yuval Raz            |
| 17 | Poughkeepsie   | Vassar Brothers Medical Center (VBMC)                                | Jennifer Osofsky     |
| 18 | Kansas         | The University of Kansas Medical Centre                              | Brigid Flynn         |
| 19 | Santa Monica   | Providence Saint John's Health Centre                                | Anna Jung            |
| 20 | Columbus       | Ohio State University Medical Centre                                 | Veena Satyapriya     |
| 21 | Portland       | Oregon Health and Science University Hospital (OHSU)                 | Bishoy Zakhary       |
| 22 | Washington     | Providence Sacred Heart Children's Hospital                          | Carl P. Garabedian   |
| 23 | Lancaster      | Lancaster General Health                                             | Cathleen Forney      |
| 24 | Philadelphia   | Penn Medicine                                                        | Asad Usman           |

|  |               |                                                                         |                             |
|--|---------------|-------------------------------------------------------------------------|-----------------------------|
|  | New Haven     | Yale New Haven Hospital                                                 | Andres Oswaldo Razo Vazquez |
|  | Cincinnati    | Cincinnati Children's                                                   | Reanna Smith                |
|  | Macon         | The Medical Centre Navicent Health                                      | James Erskine               |
|  | Philadelphia  | Main Line Health Lankenau Medical Center)                               | Eric Gnall                  |
|  | Columbia      | University of Missouri                                                  | Shyam Shankar               |
|  | Oklahoma City | Oklahoma University Medical Center (OU)                                 | Ryan Kennedy                |
|  | Oklahoma City | INTEGRIS Baptist Medical Center                                         | Michael Harper              |
|  | Charlotte     | Novant Health (NH) Presbyterian Medical Centre                          | Hannah Flynn                |
|  | Minnesota     | M Health Fairview                                                       | Rhonda Bakken               |
|  | Fresno        | University of California, San Francisco-Fresno Clinical Research Centre | Mohamed Fayed               |
|  | Boston        | Tufts Medical Centre (and Floating Hospital for Children)               | Leslie Lussier              |
|  |               | Beth Israel Deaconess Medical Centre                                    | Wilson Grandin              |
|  | Seattle       | University of Washington in Seattle                                     | Jenelle Badulak             |
|  | Charleston    | Medical University of South Carolina                                    | Monika Cardona              |
|  | Atlanta       | Piedmont Atlanta Hospital                                               | Peter Barrett               |
|  | Chicago       | University of Chicago Cardiac Surgery                                   | Pamela Combs                |
|  |               | Northwestern Medicine                                                   | Randy McGregor              |
|  | Tulsa         | Oklahoma Heart Institute                                                | Rita Moreno                 |
|  | Phoenix       | John C Lincoln Medical Centre                                           | Celina Adams                |
|  |               | Banner University Medical Centre                                        | Stacey Gerle                |
|  | Norfolk       | Sentara Norfolk General Hospital                                        | Xian Qiao                   |
|  | York          | WellSpan Health - York Hospital                                         | Josh Fine                   |
|  | Rochester     | University of Rochester Medical Centre (UR Medicine)                    | Bill Hallinan               |
|  |               | Rochester General Hospital                                              | Meghan Nicholson            |

|         |              |                                                               |                                     |
|---------|--------------|---------------------------------------------------------------|-------------------------------------|
|         | Kentucky     | University of Kentucky Medical Center                         | Thomas Tribble                      |
|         | Madison      | University of Wisconsin & American Family Children's Hospital | Jillian Koch                        |
|         | Milwaukee    | Medical College of Wisconsin (Froedtert Hospital)             | Cassandra Seefeldt                  |
|         | New Orleans  | Ochsner Clinic Foundation                                     | Julia Garcia-Diaz, Derek Vonderhaar |
|         | Philadelphia | St. Christopher's Hospital for Children                       | Daniel Marino                       |
|         | Alabama      | University of Alabama at Birmingham Hospital (UAB)            | Keith Wille                         |
|         | Portland     | Legacy Emanuel Medical Center                                 | Tawnya Ogston                       |
|         | Scottsdale   | Mayo Clinic College of Medicine                               | Ayan Sen                            |
|         | Iowa         | University of Iowa                                            | Lovkesh Arora                       |
|         | Texas        | Baylor All Saints Medical Centre, Forth Worth                 | Dr. Gonzo Gonzalez-Stawinski        |
|         |              | The Heart Hospital Baylor Plano, Plano                        | Dr Timothy George (PI)              |
|         |              | Baylor University Medical Centre, Dallas                      | Dr Dan Meyer (PI)                   |
|         |              | Baylor Scott & White Health - Temple                          | Dr Jorge Velazco (PI)               |
|         |              |                                                               | Margarite Grable                    |
|         |              | Doernbecher Children's Hospital                               | Wanda Fikes (CRC)                   |
|         |              | Doernbecher Children's Hospital                               | Amit Mehta                          |
|         |              | University of Texas Medical Branch                            | Yolanda Leyva                       |
|         |              | Cedar Park Regional Medical Center                            | Mark Sanders                        |
|         |              | UTHealth (University of Texas)                                | Lisa Janowaik                       |
| England | London       | Guy's and St Thomas NHS Foundation Trust Hospital             | Nicholas Barrett/Luigi Camporota    |
|         |              | Royal Brompton & Harefield NHS Foundation Trust               | Brij Patel                          |
|         | Cambridge    | Papworth Hospitals NHS Foundation Trust                       | Alain Vuysteke                      |
|         | Leicester    | University Hospitals of Leicester NHS Trust                   | Yusuff Hakeem                       |
|         | Manchester   | Manchester University NHS Foundation Trust - Wythenshawe      | Tim Felton/Miguel Garcia            |

|                    |               |                                                             |                                                 |
|--------------------|---------------|-------------------------------------------------------------|-------------------------------------------------|
| <b>Scotland</b>    | Edinburgh     | Royal Infirmary Edinburgh                                   | Kenneth Baillie                                 |
|                    | Aberdeen      | Aberdeen Royal Infirmary (Foresterhill Health Campus)       | Emma Hartley                                    |
| <b>Wales</b>       | Swansea       | Swansea Hospital                                            | Lenny Ivatt                                     |
| <b>Netherlands</b> | Nijmegen      | Radboud University Medical Centre                           | Tim Frenzel                                     |
|                    | St. Antonious | St. Antonius Hospital                                       | Nicole Van Belle                                |
|                    | Maastricht    | Maastricht University Medical Centre                        | Roberto Lorusso                                 |
| <b>Belgium</b>     | Edegem        | University of Antwerp                                       | Gerdy Debeuckelaere                             |
|                    | Brussels      | Universite Libre de Bruxelles                               | Fabio Taccone                                   |
|                    | Lodelinsart   | Hospital Civil Marie Curie                                  | Anne Joosten                                    |
|                    | Leuven        | Collaborative Centre Department Cardiac Surgery, UZ Leuven  | Klaartje Van den Bossche and Bart Mey           |
| <b>Kuwait</b>      | Hadiya        | Al-Adan Hospital                                            | Tala Al-Dabbous                                 |
|                    | Kuwait City   | Kuwait ECLS program, Al-Amiri & Jaber Al-Ahmed Hospitals    | Abdulrahman Al-Fares                            |
| <b>Saudi Arabi</b> | Mecca         | King Abdullah Medical City Specialist Hospital              | Jihan Fatani                                    |
|                    | Jeddah        | King Abdullah Medical Complex                               | Husam Baeissa;Dr. Mohamed Azzam;Dr. S<br>Ashgar |
|                    | Tabuk         | King Salman Hospital NWAf                                   | Ayman AL Masri                                  |
|                    | Riyadh        | Prince Mohammed bin Abdulaziz Hospital                      | Ahmed Rabie                                     |
|                    |               | King Faisal Specialist Hospital and Research Center         | Abdullah Al-Hudaib<br>Alyaa Elhazmi             |
| <b>Austria</b>     | Vienna        | Sozialmedizinisches Zentrum Süd - Kaiser-Franz-Josef-Spital | Tamara Seitz                                    |
|                    |               | Medical University of Vienna                                | Nina Buchtele (ICU)<br>Michael Schwameis (ED)   |
| <b>Philippines</b> | Quezon City   | National Kidney and Transplant Institute                    | Joselito Chavez                                 |
| <b>Estonia</b>     | Tallinn       | North Estonia Medical Centre                                | Indrek Ratsep                                   |

|               |                                                                                                                             |                                                     |                                  |                      |
|---------------|-----------------------------------------------------------------------------------------------------------------------------|-----------------------------------------------------|----------------------------------|----------------------|
|               | Tartu                                                                                                                       | Tartu University Hospital                           | Olavi Maasikas                   |                      |
| <b>Canada</b> | Toronto                                                                                                                     | Toronto General Hospital                            | Eddy Fan, Kathleen Exconde       |                      |
|               | Toronto                                                                                                                     | Mount Sinai Hospital                                | Eddy Fan                         |                      |
|               | Winnipeg                                                                                                                    | University of Manitoba                              | Rohit Singal                     |                      |
|               |                                                                                                                             |                                                     | Rakesh Arora                     |                      |
|               | Edmonton                                                                                                                    | University of Alberta (Mazankowski Heart Institute) | Gurmeet Singh                    |                      |
|               |                                                                                                                             |                                                     | Sean Bagshaw                     |                      |
|               | Hamilton                                                                                                                    | Hamilton General Hospital                           | Faizan Amin                      |                      |
|               | Montreal                                                                                                                    | McGill University Health Centre                     | Gordan Samoukoviv                |                      |
|               |                                                                                                                             | University de Montreal                              | Yoan Lamarche                    |                      |
|               | New Westminster                                                                                                             | Royal Columbian Hospital                            | Derek Gunning                    |                      |
| Calgary       | University of Calgary (Peter Lougheed Centre, Foothills Medical Centre, South Health Campus and Rockyview General Hospital) | Ken Parhar and Cassidy Codan                        |                                  |                      |
| Manitoba      | St Boniface Hospital                                                                                                        | Rakesh Arora                                        |                                  |                      |
| <b>India</b>  | Kolkata                                                                                                                     | Medica Superspeciality Hospital                     | Arpan Chakraborty                |                      |
| <b>Spain</b>  | Alicante                                                                                                                    | Hospital Universitario Sant Joan d'Alacant          | Angel Sanchez                    |                      |
|               | Lugo                                                                                                                        | Hospital Universitario Lucus Augusti                | Ignacio Martinez                 |                      |
|               | Zaragoza                                                                                                                    | Hospital Nuestra Señora de Gracia                   | Ruth Jorge García                |                      |
|               | Barcelona                                                                                                                   | Hospital Universitario de Bellvitge                 | Rafael Máñez Mendiluce           |                      |
|               |                                                                                                                             |                                                     | Hospital Clinic, Barcelona       | Antoni Torres        |
|               |                                                                                                                             |                                                     | Hospital Universitari Sagrat Cor | Adrian Ceccato       |
|               |                                                                                                                             |                                                     | Hospital de Sant Pau             | Ferran Roche-Campo   |
|               |                                                                                                                             |                                                     | Clínica Sagrada Família          | Arturo Huerta Garcia |
|               | Vall d'Hebron University Hospital, Barcelona                                                                                | Ricard Ferrer                                       |                                  |                      |



|                  |              |                                                                |                                |
|------------------|--------------|----------------------------------------------------------------|--------------------------------|
|                  |              |                                                                | Jordi Riera                    |
|                  | Valladolid   | Rio Hortega University Hospital                                | Pablo Blanco                   |
|                  | Caceres      | San Pedro de Alcantara Hospital                                | Juan Fernando Masa Jiménez     |
|                  | Cadiz        | Hospital Universitario Virgen de Valme                         | Ana Loza Vazquez               |
|                  | Navarra      | Clinica Universidad de Navarra                                 | Nahikari Saltera               |
| <b>Argentina</b> | Buenos Aires | Hospital de Clinicas                                           | Carlos Luna                    |
|                  | Buenos Aires | National University of Comahue                                 | Gustavo Zabert                 |
|                  | Buenos Aires | Hospital Alemán                                                | Javier Osatnik                 |
|                  | Buenos Aires | Clinica Bazterrica                                             | Fernando Palizas               |
|                  | Lisbon       | University Hospital CHLN                                       | Joao Miguel Ribeiro            |
|                  | Portugal     | São João Hospital Centre, Porto                                | Sérgio Gaião                   |
| <b>Colombia</b>  | Bucaramanga  | Fundación Cardiovascular de Colombia                           | Leonardo Salazar               |
|                  | Cali         | Clinica Valle de Lilli                                         | Diego Fernando Bautista Rincón |
|                  | Bogota       | Fundación Clinica Shaio                                        | Estefania Giraldo              |
| <b>Chile</b>     | Las Condes   | Clinica Las Condez                                             | Roderigo Diaz                  |
|                  | Santiago     | Hospital del Tórax                                             | Francisco Arancibia            |
|                  | Santiago     | Clinica Alemana De Santiago                                    | Jerónimo Graf                  |
| <b>Germany</b>   | Regensburg   | Universitätsklinikum Regensburg (Klinik für Innere Medizin II) | Maximilian Malfertheiner       |
|                  | Donaustauf   | Donaustauf Hospital                                            | Annette Schweda                |
|                  | Regensburg   | Barmherzige Bruder Regensburg                                  | Stephan Schroll                |
|                  | Munich       | Medizinische Klinik und Poliklinik II                          | Stephanie Stecher              |
|                  | Berlin       | Charite-Universitätsmedizin Berlin                             | Roland Francis                 |
|                  | Passau       | Klinikum Passau                                                | Johannes Gebauer               |
|                  | Nuremberg    | Paracelsus Medical University Nuremberg                        | Matthias Baumgaertel           |

|                     |                |                                                                           |                               |
|---------------------|----------------|---------------------------------------------------------------------------|-------------------------------|
|                     | Frankfurt      | Universitätsklinikum Frankfurt (University Hospital Frankfurt)(Uniklinik) | Gösta Lotz                    |
|                     | Stockwerk      | Universitätsspital Bern, Universitätsklinik für Herz- und Gefässchirurgie | Beate Hugi-Mayr               |
| <b>Brazil</b>       | Belo Horizonte | Hospital Mater Dei                                                        | Ana Luiza Valle Martins       |
|                     | São Paulo      | Universidade de São Paulo                                                 | Marcelo Amato                 |
|                     | São Paulo      | Hospital das Clínicas da Faculdade de Medicina da USP (HCFMUSP)           | Suely Pereira Zeferino        |
|                     | Rio de Janeiro | Universidade Federal Fluminense                                           | Marcello Salgado              |
| <b>Ireland</b>      | Galway         | National University of Ireland Galway                                     | John Laffey                   |
|                     | Dublin         | St James's University Hospital                                            | Ignacio Martin-Loeches        |
|                     |                | Mater Misericordiae University Hospital                                   | Ed Carton                     |
|                     | Crumlin        | Children's Health Ireland (CHI) at Crumlin                                | Sunimol Joseph                |
| <b>Poland</b>       | Krakow         | University Hospital in Krakow                                             | Konstanty S. Szuldrzynski     |
|                     | Ghansk         | Gdansk Medical University                                                 | Wojtek Karolak                |
| <b>South Africa</b> | Johannesburg   | Nelson Mandela Children's Hospital                                        | Krubin Naidoo                 |
|                     |                | Netcare Unitas ECMO Centre                                                | Marlice van Dyk               |
|                     | Cape Town      | Groote Schuur Hospital                                                    | David Thomson                 |
| <b>Qatar</b>        | Qatar          | Hamad General Hospital - Weill Cornell Medical College in Qatar           | Ibrahim Hassan and Ali Hssain |
| <b>Egypt</b>        | Cairo          | Cairo University Hospital                                                 | Ahmad Abdelaziz               |
| <b>Sweden</b>       | Gothenburg     | Sahlgrenska University Hospital                                           | Pia Watson                    |
| <b>Croatia</b>      | Zagreb         | University Hospital Dubrava                                               | Nikola Bradic                 |
| <b>Luxembourg</b>   | Barble         | Luxembourg Heart Center                                                   | Katja Ruck                    |
| <b>Ukraine</b>      | Kyiv           | Heart Institute Ministry of Health of Ukraine                             | Serhii Sudakevych             |
| <b>Switzerland</b>  | Bern           | Inselspital University Hospital                                           | Beate Hugi-Mayr               |
| <b>Turkey</b>       | Izmir          | Dr. Suat Seren Chest Diseases and Surgery Practice and Training Centre    | Cenk Kirakli                  |
| <b>Mexico</b>       | Zapopan        | Hospital Puerta de Hierro                                                 | Anna Greti                    |

|                 |         |                                                                          |               |
|-----------------|---------|--------------------------------------------------------------------------|---------------|
| <b>UAE</b>      | Dubai   | American Hospital                                                        | Balu Bhaskar  |
| <b>Lebanon</b>  | Beirut  | Pediatric and Neonatal Cardiac intensive care at the American University | Jana Assy     |
| <b>Kenya</b>    | Nairobi | Kenyatta National Hospital (KNH)                                         | George Nyale  |
|                 | Nairobi | Kenyatta University Teaching, Referral & Research Hospital               | George Nyale  |
| <b>Tunisia</b>  | Tunis   | Charles Nicolle University Hospital                                      | Ali Cherif    |
| <b>Zimbabwe</b> | Harare  | St Annes Hospital                                                        | Jackie Stone  |
| <b>Morocco</b>  | Oujda   | Mohammed VI university hospital                                          | Brahim Housni |
|                 | Rabat   | Rabat university hospital                                                | Younes Oujidi |
|                 |         |                                                                          | Jawad Tadili  |

Peer review only

1  
2  
3  
4  
5  
6  
7  
8  
9  
10  
11  
12  
13  
14  
15  
16  
17  
18  
19  
20  
21  
22  
23  
24  
25  
26  
27  
28  
29  
30  
31  
32  
33  
34  
35  
36  
37  
38  
39  
40  
41  
42  
43  
44  
45  
46  
47  
48  
49  
50  
51  
52  
53  
54  
55  
56  
57  
58  
59  
60

For peer review only

**SUPPLEMENT 3**

**REGIONAL LEADS/ASSISTANTS**

**OPERATIONAL TEAM**

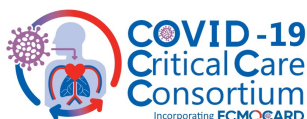

## REGIONAL LEADS/ASSISTANTS

| Country            | Regional Lead                                     | Regional Lead Affiliation                            | Regional Coordinator/Assistant             |
|--------------------|---------------------------------------------------|------------------------------------------------------|--------------------------------------------|
| <b>Australia</b>   | Hergen Buscher                                    | St Vincent's Hospital, Sydney                        | India Lye                                  |
| <b>Australia</b>   | Carol Hodgson                                     | The Alfred Hospital, Melbourne                       |                                            |
| <b>New Zealand</b> | Shay McGuinness                                   | Auckland City Hospital                               | Rachael Parke                              |
| <b>Hong Kong</b>   | Simon Wai Ching Sin                               | Queen Mary Hospital, Hong Kong                       | Pauline Yeung                              |
| <b>Indonesia</b>   | Eva Marwali                                       | National Cardiovascular Center Harapan Kita, Jakarta |                                            |
| <b>Indonesia</b>   | Erlina Burhan                                     | Persahabatan Hospital, Jakarta                       |                                            |
| <b>Japan</b>       | Shingo Ichiba                                     | Nippon Medical School Hospital, Tokyo                | Keibun Liu, Takako Akimoto                 |
| <b>Singapore</b>   | Kollengode Ramanathan                             | National University Hospital, Singapore              |                                            |
| <b>South Korea</b> | Young-Jae Cho                                     | Seoul National University Bundang Hospital           | Hwa Jin Cho, Jae-Seung Jung                |
| <b>Taiwan</b>      | Yih-Sharng Chen, Jung-Yien Chien, Chih-Hsien Wang | National Taiwan University Hospital                  |                                            |
| <b>Vietnam</b>     | Vinh Chau                                         | Hospital for Tropical Diseases, Ho Chi Minh City     | Trieu Huynh, Sophie Yacoub, Angela McBride |
| <b>Italy</b>       | Antonio Pesenti, Mauro Panigada                   | Fondazione IRCCS Policlinico of Milan                | Michela Leone and Sebastiano Colombo       |
| <b>USA</b>         | Robert Bartlett                                   | University of Michigan Medical School                | Leticia Helms                              |
| <b>USA</b>         | Daniel Brodie                                     | Columbia University Medical Centre                   |                                            |
| <b>USA</b>         | Phillip Mason                                     | Brooke Army Medical Center, San Antonio              |                                            |
| <b>USA</b>         | Archit Sharma                                     | University of Iowa Hospitals & Clinics               |                                            |

|                           |                          |                                                         |                      |
|---------------------------|--------------------------|---------------------------------------------------------|----------------------|
| <b>USA</b>                | Christian Bermudez       | Hospital of the University of Pennsylvania              |                      |
| <b>USA</b>                | Vadim Gudzenko           | UCLA Medical Centre (Ronald Regan)                      |                      |
| <b>USA</b>                | Bishoy Zakhary           | Oregon Health and Science University Hospital, Portland |                      |
| <b>England</b>            | Brij Patel               | Royal Brompton & Harefield NHS Foundation Trust         | Johnny Millar        |
| <b>Scotland<br/>Wales</b> | Johnny Millar            | University of Glasgow                                   |                      |
| <b>Netherlands</b>        | Roberto Lorusso          | Maastricht University Medical Centre                    |                      |
| <b>Belgium</b>            | Fabio Taccone            | Universite Libre de Bruxelles                           |                      |
| <b>Kuwait</b>             | Abdulrahman Al-Fares     | Al-Amiri & Jaber Al-Ahmed Hospitals                     |                      |
| <b>Saudi Arabi</b>        | Alyaa Elhazmi            | King Faisal Specialist Hospital and Research Center     |                      |
| <b>Saudi Arabi</b>        | Ahmed Rabie              | Prince Mohammed bin Abdulaziz Hospital                  |                      |
| <b>Austria</b>            | Nina Buchtele            | Medical University of Vienna                            |                      |
| <b>Philippines</b>        | Joselito Chavez          | National Kidney and Transplant Institute                |                      |
| <b>Estonia</b>            | Indrek Ratsep            | North Estonia Medical Centre                            | Silver Heinsar       |
| <b>Canada</b>             | Eddy Fan                 | Toronto General Hospital Research Institute             | Kathleen Exconde     |
| <b>India</b>              | Arpan Chakraborty        | Medica Superspeciality Hospital                         | Kiran Shekar         |
| <b>Spain</b>              | Antoni Torres            | Hospital Clinic, Barcelona                              |                      |
| <b>Spain</b>              | Ricard Ferrer            | Hospital Vall d'Hebron                                  | Jordi Riera Del Brio |
| <b>Argentina</b>          | Carlos Luna              | Hospital de Clinicas                                    |                      |
| <b>Colombia</b>           | Leonardo Salazar         | Fundación Cardiovascular de Colombia                    |                      |
| <b>Germany</b>            | Maximilian Malfertheiner | Universitätsklinikum Regensburg                         |                      |

|                     |                            |                                       |  |
|---------------------|----------------------------|---------------------------------------|--|
| <b>Brazil</b>       | Marcelo Amato              | Universidade de São Paulo             |  |
| <b>Brazil</b>       | Marcello Salgado           | Federal University of Rio de Janeiro  |  |
| <b>Ireland</b>      | John Laffey                | National University of Ireland Galway |  |
| <b>Poland</b>       | Konstanty S. Szuldrzynski  | University Hospital in Krakow         |  |
| <b>South Africa</b> | David Thomsom              | Groote Schuur Hospital                |  |
| <b>Qatar</b>        | Ibrahim Hassan, Ali Hssain | Hamad General Hospital                |  |
| <b>Egypt</b>        | Ahmad Abdelaziz            | Cairo University Hospital             |  |
| <b>Sweden</b>       | Pia Watson                 | Sahlgrenska University Hospital       |  |
| <b>Zimbabwe</b>     | Jackie Stone               | St Annes Hospital                     |  |

peer review only



**COORDINATING CENTRE OPERATIONAL TEAM**

1. Cooper Ansicar
2. Chris Chan
3. William Crawford
4. Gaenor Cross
5. Courtney Dwyer
6. Alessandro Ferraioli
7. Halah Hassan
8. Samuel Huth
9. Lacey Irvine
10. Christine Jackman
11. Varun Karnik
12. Katrina Ki
13. Niki McGuinness
14. Hollier O'Neill
15. Janice Reid
16. Kei Sato
17. Declan Sela
18. Yvgeniy Shek
19. Emily Wood
20. Stephanie Yerkovich
21. Taylor Zhang

1  
2  
3  
4  
5  
6  
7  
8  
9  
10  
11  
12  
13  
14  
15  
16  
17  
18  
19  
20  
21  
22  
23  
24  
25  
26  
27  
28  
29  
30  
31  
32  
33  
34  
35  
36  
37  
38  
39  
40  
41  
42  
43  
44  
45  
46  
47  
48  
49  
50  
51  
52  
53  
54  
55  
56  
57  
58  
59  
60

For peer review only

# SUPPLEMENT 4

# CASE REPORT FORM



## Data Collection Form

### CORE CASE RECORD FORM (EOT ICU Admis)

#### 1. UPON ICU ADMISSION – Please complete the below data as of the date and time of the patient's admission to the ICU

**DATE OF ICU ADMISSION:** \_\_\_\_ / \_\_\_\_ / \_\_\_\_ (ONLY DATE, FROM 14/12/2019)

**1.1 HEIGHT (cm):** \_\_\_\_\_

If this data has already been entered into the 'Signs and Symptoms' section of the ISARIC CRF, please DO NOT re-enter the data here. Leave this '1.1 Height' box blank.

**1.2 BODY WEIGHT (Kg):** \_\_\_\_\_

If this data has already been entered into the 'Signs and Symptoms' section of the ISARIC CRF, please DO NOT re-enter the data here. Leave this '1.2 Body Weight' box blank.

#### 1.3 Arterial Hypertension

- Yes  
 No

If this data has already been entered into the 'Co-Morbidities & Risk Factors' section of the ISARIC CRF, please DO NOT re-enter the data here. Leave this '1.3 Hypertension' box blank.

#### 1.3a Chronic anti-hypertensive therapy (if 'Yes' to 1.3. Please select up to three)

- Diuretics  
 Calcium channel blockers  
 ACE inhibitors

If this data has already been entered in the 'Pre-Admission Medication' section of the ISARIC CRF, please DO NOT re-enter the data here. Leave this 'ACE inhibitors' box blank.

- Angiotensin II receptor antagonists

If this data has already been entered in the 'Pre-Admission Medication' section of the ISARIC CRF, please DO NOT re-enter the data here. Leave this 'Angiotensin II receptor antagonists' box blank.

- Renin inhibitors  
 Beta blockers  
 Alpha blockers  
 Vasodilators  
 Aldosterone receptor antagonist  
 Alpha-2 adrenergic receptor agonists  
 Not applicable

#### 1.4 GASTROINTESTINAL AND PANCREATIC COMORBIDITIES

- Yes  
 No

**1.5 HEPATIC AND BILIARY COMORBIDITIES**

- Yes  
 No

**1.6 HAEMATOLOGIC AND SPLEEN COMORBIDITIES**

- Yes  
 No

**1.7 IMMUNOLOGICAL AND TRANSPLANT COMORBIDITIES**

- Yes  
 No

**1.8 ENDOCRINOLOGICAL COMORBIDITIES**

- Yes  
 No

**1.9 GENITO-URINARY COMORBIDITIES**

- Yes  
 No

**1.10 CHRONIC ALCOHOL ABUSE**

- Yes  
 No

**1.11 INTRAVENOUS DRUGS ABUSE**

- Yes  
 No

**1.12 IMMUNO-COMPETENT**

- Yes  
 No

**1.13 APACHE II SCORE:** \_\_\_\_\_ (ONLY NUMBERS FROM 0 to 71)

APACHE II score can be calculated at the following link <https://www.mdcalc.com/apache-ii-score>

- Not available

**1.14 SOFA SCORE:** \_\_\_\_\_ (ONLY NUMBERS FROM 0 to 24)

SOFA score can be calculated at the following link <https://www.mdcalc.com/sequential-organ-failure-assessment-sofa-score>

- Not available

**BLOOD GAS ANALYSIS (Qs 1.15 – 1.20) – Please document the values associated with the ‘worst’ blood gas analysis in the 6 hours prior to ICU admission. ‘Worst’ blood gas is defined as the blood gas with the lowest PaO<sub>2</sub>/FiO<sub>2</sub> ratio.**

**1.15 ARTERIAL pH IN THE LAST 6h:** \_\_\_\_\_ (ONLY NUMBERS FROM 6.500 TO 7.600)

Please document the values associated with the 'worst' blood gas analysis in the 6 hours prior to ICU admission. 'Worst' is defined as the blood gas with the lowest PaO<sub>2</sub>/FiO<sub>2</sub> ratio.  Not available

**1.16 ARTERIAL PARTIAL PRESSURE OF OXYGEN IN THE LAST 6h (mmHg):** \_\_\_\_\_ (ONLY NUMBERS FROM 20 TO 500)

Please document the values associated with the 'worst' blood gas analysis in the 6 hours prior to ICU admission. 'Worst' is defined as the blood gas with the lowest PaO<sub>2</sub>/FiO<sub>2</sub> ratio.  Not available

**1.17 ARTERIAL PARTIAL PRESSURE OF CARBON DIOXIDE IN THE LAST 6h (mmHg):** \_\_\_\_\_ (ONLY NUMBERS FROM 10 TO 100)

Please document the values associated with the 'worst' blood gas analysis in the 6 hours prior to ICU admission. 'Worst' is defined as the blood gas with the lowest PaO<sub>2</sub>/FiO<sub>2</sub> ratio.  Not available

**1.18 ARTERIAL BICARBONATE (HCO<sub>3</sub><sup>-</sup>) IN THE LAST 6h** \_\_\_\_\_ mEq/L

Please document the values associated with the 'worst' blood gas analysis in the 6 hours prior to ICU admission. 'Worst' is defined as the blood gas with the lowest PaO<sub>2</sub>/FiO<sub>2</sub> ratio.

Not available

**1.19 ARTERIAL Base excess IN THE LAST 6h** \_\_\_\_\_ mmol/L

Please document the values associated with the 'worst' blood gas analysis in the 6 hours prior to ICU admission. 'Worst' is defined as the blood gas with the lowest PaO<sub>2</sub>/FiO<sub>2</sub> ratio.

Not available

**1.20 Lactate IN THE LAST 6h** \_\_\_\_\_ mmol/L

Please document the values associated with the 'worst' blood gas analysis in the 6 hours prior to ICU admission. 'Worst' is defined as the blood gas with the lowest PaO<sub>2</sub>/FiO<sub>2</sub> ratio.  Not available

**1.21 Ferritin in the last 12 hours:** \_\_\_\_\_ (ng/mL)

Only numbers from 0-1000

Not available

**1.22 D-dimer in the last 12 hours:**

\_\_\_\_\_ (ng/mL or mcg/mL)

Only numbers from 0-15000

Not available

**1.23 Troponin in the last 12 hours:**

Troponin T: \_\_\_\_\_ (ng/mL or ng/L)

Troponin I: \_\_\_\_\_ (ng/mL or ng/L)

High sensitivity troponin T: \_\_\_\_\_ (ng/mL or ng/L)

High sensitivity troponin I: \_\_\_\_\_ (ng/mL or ng/L)

Not available

**1.24 Cardiac BNP in the last 12 hours:**

\_\_\_\_\_ (picograms/mL)

Only numbers between 0-1000

Not available

1  
2  
3  
4  
5 **1.25 Upon ICU admission, did the patient present with cutaneous manifestations?**

- 6  Yes  
7  No  
8  Not available  
9

10  
11 **If yes to 1.25, type of cutaneous manifestations (please select up to three (3) options)**

- 12  Bullae  
13  Macules  
14  Nodules  
15  Papules  
16  Plaques  
17  Purpura  
18  Pustules  
19  Rash  
20  Scale  
21  Urticaria  
22  Vesicles  
23  Other: \_\_\_\_\_  
24  
25  
26  
27  
28  
29  
30

31 **If yes to 1.25, specify the involved regions (please select up to three (3) options):**

- 32  Face  
33  Trunk  
34  Upper limbs  
35  Hands  
36  Lower limbs  
37  Feet  
38  
39  
40  
41  
42  
43  
44  
45  
46  
47  
48  
49  
50  
51  
52  
53  
54  
55  
56  
57  
58  
59  
60

For peer review only

## CORE CASE RECORD FORM (EOT Mech Vent)

**2. UPON COMMENCEMENT OF MECHANICAL VENTILATION - 'Mechanical ventilation' includes invasive mechanical ventilation via an endotracheal tube or tracheostomy only. Importantly, this module will be active only when you click 'YES' in the field '1.17 Invasive ventilation?' of the SPRINT-SARI form.**

**2.1 DATE OF START OF MECHANICAL VENTILATION:** \_\_\_\_ / \_\_\_\_ / \_\_\_\_ (ONLY DATE, FROM 14/12/2019)

### 2.2 SITE OF INTUBATION

- Outside hospital
- Intensive Care Unit
- Emergency Department
- Hospital Ward
- Different hospital, then patient was transferred
- Other

### 2.3 TYPE OF INTUBATION

- Elective
- Emergent

### 2.4 CARDIAC ARREST

- Yes
- No

### 2.5 VENTILATORY SUPPORT BEFORE INTUBATION

- High-Flow Oxygen Ventilation
- Mask non-invasive ventilation
- Full Face-mask non-invasive ventilation
- Helmet non-invasive ventilation
- Simple face mask oxygen therapy
- Venturi mask oxygen therapy
- Non re-breather face mask oxygen therapy
- Nasal prongs oxygen therapy
- Other
- Not available

**BLOOD GAS ANALYSIS (Qs 2.6 – 2.11) – Please document the values associated with the 'worst' blood gas analysis in the 6 hours prior to commencement of mechanical ventilation. 'Worst' blood gas is defined as the blood gas with the lowest PaO<sub>2</sub>/FiO<sub>2</sub> ratio.**

**2.6 ARTERIAL pH IN THE 6 HOURS BEFORE START OF MV:** \_\_\_\_\_ (ONLY NUMBERS FROM 6.500 TO 7.600)

Please document the values associated with the 'worst' blood gas analysis in the 6 hours prior to commencement of mechanical ventilation. 'Worst' is defined as the blood gas with the lowest PaO<sub>2</sub>/FiO<sub>2</sub> ratio.

- Not available

**2.7 ARTERIAL PARTIAL PRESSURE OF OXYGEN (mmHg) IN THE 6 HOURS BEFORE START OF MV:** \_\_\_\_\_ (ONLY NUMBERS FROM 20 TO 500)



Please document the values associated with the 'worst' blood gas analysis in the 6 hours prior to commencement of mechanical ventilation. 'Worst' is defined as the blood gas with the lowest PaO<sub>2</sub>/FiO<sub>2</sub> ratio.

Not available

**2.8 ARTERIAL PARTIAL PRESSURE OF CARBON DIOXIDE (mmHg) IN THE 6 HOURS BEFORE START OF MV:** \_\_\_\_\_ (ONLY NUMBERS FROM 10 TO 100)

Please document the values associated with the 'worst' blood gas analysis in the 6 hours prior to commencement of mechanical ventilation. 'Worst' is defined as the blood gas with the lowest PaO<sub>2</sub>/FiO<sub>2</sub> ratio.

Not available

**2.9 ARTERIAL HCO<sub>3</sub><sup>-</sup> IN THE 6 HOURS BEFORE START OF MV** \_\_\_\_\_ mEq/L

Please document the values associated with the 'worst' blood gas analysis in the 6 hours prior to commencement of mechanical ventilation. 'Worst' is defined as the blood gas with the lowest PaO<sub>2</sub>/FiO<sub>2</sub> ratio.

Not available

**2.10 ARTERIAL Base excess IN THE 6 HOURS BEFORE START OF MV** \_\_\_\_\_ mmol/L

Please document the values associated with the 'worst' blood gas analysis in the 6 hours prior to commencement of mechanical ventilation. 'Worst' is defined as the blood gas with the lowest PaO<sub>2</sub>/FiO<sub>2</sub> ratio.

Not available

**2.11 Lactate IN THE 6 HOURS BEFORE START OF MV** \_\_\_\_\_ mmol/L

Please document the values associated with the 'worst' blood gas analysis in the 6 hours prior to commencement of mechanical ventilation. 'Worst' is defined as the blood gas with the lowest PaO<sub>2</sub>/FiO<sub>2</sub> ratio.

Not available

**2.12 USE OF CONTINUOUS RENAL REPLACEMENT THERAPY BEFORE START OF MV**

Yes

No

**2.13 USE OF VASOACTIVE DRUGS BEFORE START OF MV**

Yes

No

**2.14 USE OF CARDIAC ASSIST DEVICES BEFORE START OF MV**

Yes

No

**2.15 ANTIBIOTICS BEFORE START OF MV**

- |                                                    |                                                       |                                               |
|----------------------------------------------------|-------------------------------------------------------|-----------------------------------------------|
| <input type="checkbox"/> Amikacin                  | <input type="checkbox"/> Bacitracin                   | <input type="checkbox"/> Cefepime             |
| <input type="checkbox"/> Amoxicillin               | <input type="checkbox"/> Capreomycin                  | <input type="checkbox"/> Cefixime             |
| <input type="checkbox"/> Amoxicillin + Clavulanate | <input type="checkbox"/> Carbenicillin indanyl sodium | <input type="checkbox"/> Cefmetazole          |
| <input type="checkbox"/> Ampicillin                | <input type="checkbox"/> Cefaclor                     | <input type="checkbox"/> Cefonicid            |
| <input type="checkbox"/> Ampicillin + Sulbactam    | <input type="checkbox"/> Cefadroxil                   | <input type="checkbox"/> Cefoperazone         |
| <input type="checkbox"/> Atovaquone                | <input type="checkbox"/> Cefamandole                  | <input type="checkbox"/> Cefotaxime           |
| <input type="checkbox"/> Azithromycin              | <input type="checkbox"/> Cefazolin                    | <input type="checkbox"/> Cefotetan            |
| <input type="checkbox"/> Aztreonam                 | <input type="checkbox"/> Cefdinir                     | <input type="checkbox"/> Cefoxitin            |
| <input type="checkbox"/> Bacampicillin             | <input type="checkbox"/> Cefditoren                   | <input type="checkbox"/> Cefpodoxime Proxetil |
|                                                    |                                                       | <input type="checkbox"/> Cefprozil            |

- |                          |                       |                          |                                                              |
|--------------------------|-----------------------|--------------------------|--------------------------------------------------------------|
| <input type="checkbox"/> | Ceftaroline           | <input type="checkbox"/> | Neomycin                                                     |
| <input type="checkbox"/> | Ceftazidime           | <input type="checkbox"/> | Netilmicin                                                   |
| <input type="checkbox"/> | Ceftibuten            | <input type="checkbox"/> | Nitrofurantoin                                               |
| <input type="checkbox"/> | Ceftizoxime           | <input type="checkbox"/> | Nitrofurazone                                                |
| <input type="checkbox"/> | Ceftobiprole          | <input type="checkbox"/> | Norfloxacin                                                  |
| <input type="checkbox"/> | Ceftriaxone           | <input type="checkbox"/> | Novobiocin                                                   |
| <input type="checkbox"/> | Cefuroxime            | <input type="checkbox"/> | Ofloxacin                                                    |
| <input type="checkbox"/> | Cephalexin            | <input type="checkbox"/> | Oxacillin                                                    |
| <input type="checkbox"/> | Cephalothin           | <input type="checkbox"/> | Oxytetracycline                                              |
| <input type="checkbox"/> | Cephapirin            | <input type="checkbox"/> | Penicillin                                                   |
| <input type="checkbox"/> | Cephradine            | <input type="checkbox"/> | Piperacillin                                                 |
| <input type="checkbox"/> | Chloramphenicol       | <input type="checkbox"/> | Piperacillin +<br>Tazobactam                                 |
| <input type="checkbox"/> | Cinoxacin             | <input type="checkbox"/> | Podofilox                                                    |
| <input type="checkbox"/> | Ciprofloxacin         | <input type="checkbox"/> | Polymyxin B                                                  |
| <input type="checkbox"/> | Clarithromycin        | <input type="checkbox"/> | Quinupristin +<br>Dalfopristin                               |
| <input type="checkbox"/> | Clindamycin           | <input type="checkbox"/> | Retapamulin                                                  |
| <input type="checkbox"/> | Cloxacillin           | <input type="checkbox"/> | Rifapentine                                                  |
| <input type="checkbox"/> | Colistimethate        | <input type="checkbox"/> | Rifaximin                                                    |
| <input type="checkbox"/> | Cycloserine           | <input type="checkbox"/> | Saturated Solution of<br>Potassium Iodide (SSKI)             |
| <input type="checkbox"/> | Daptomycin            | <input type="checkbox"/> | Sparfloxacin                                                 |
| <input type="checkbox"/> | Demeclocycline        | <input type="checkbox"/> | Spectinomycin                                                |
| <input type="checkbox"/> | Dicloxacillin         | <input type="checkbox"/> | Streptomycin                                                 |
| <input type="checkbox"/> | Dirithromycin         | <input type="checkbox"/> | Sulfadiazine                                                 |
| <input type="checkbox"/> | Doripenem             | <input type="checkbox"/> | Sulfamethoxazole                                             |
| <input type="checkbox"/> | Doxycycline           | <input type="checkbox"/> | Sulfisoxazole                                                |
| <input type="checkbox"/> | Enoxacin              | <input type="checkbox"/> | Sulphur, precipitated in<br>petrolatum                       |
| <input type="checkbox"/> | Ertapenem             | <input type="checkbox"/> | TCA (trichloroacetic<br>acid), BCA<br>(bichloroacetic acid). |
| <input type="checkbox"/> | Erythromycin          | <input type="checkbox"/> | Teicoplanin                                                  |
| <input type="checkbox"/> | Fosfomycin            | <input type="checkbox"/> | Telavancin                                                   |
| <input type="checkbox"/> | Gatifloxacin          | <input type="checkbox"/> | Telithromycin                                                |
| <input type="checkbox"/> | Gemifloxacin          | <input type="checkbox"/> | Terbinafine                                                  |
| <input type="checkbox"/> | Gentamicin            | <input type="checkbox"/> | Tetracycline                                                 |
| <input type="checkbox"/> | Grepafloxacin         | <input type="checkbox"/> | Ticarcillin                                                  |
| <input type="checkbox"/> | Imipenem/Cilastatin   | <input type="checkbox"/> | Ticarcillin + Clavulanic<br>Acid                             |
| <input type="checkbox"/> | Imiquimod             | <input type="checkbox"/> | Tigecycline                                                  |
| <input type="checkbox"/> | Kanamycin             | <input type="checkbox"/> | Tobramycin                                                   |
| <input type="checkbox"/> | Levofloxacin          | <input type="checkbox"/> | Trimethoprim                                                 |
| <input type="checkbox"/> | Lincomycin            | <input type="checkbox"/> | Trimethoprim +<br>Sulfamethoxazole                           |
| <input type="checkbox"/> | Linezolid             | <input type="checkbox"/> | Trovafloxacin                                                |
| <input type="checkbox"/> | Lomefloxacin          | <input type="checkbox"/> | Vancomycin                                                   |
| <input type="checkbox"/> | Loracarbef            |                          |                                                              |
| <input type="checkbox"/> | Mafenide              |                          |                                                              |
| <input type="checkbox"/> | Meropenem             |                          |                                                              |
| <input type="checkbox"/> | Methenamine hippurate |                          |                                                              |
| <input type="checkbox"/> | Methicillin           |                          |                                                              |
| <input type="checkbox"/> | Metronidazole         |                          |                                                              |
| <input type="checkbox"/> | Mezlocillin           |                          |                                                              |
| <input type="checkbox"/> | Minocycline           |                          |                                                              |
| <input type="checkbox"/> | Moxifloxacin          |                          |                                                              |
| <input type="checkbox"/> | Mupirocin             |                          |                                                              |
| <input type="checkbox"/> | Nafcillin             |                          |                                                              |
| <input type="checkbox"/> | Nalidixic Acid        |                          |                                                              |

For peer review only

## CORE CASE RECORD FORM (EOT Start ECMO)

**3. UPON COMMENCEMENT OF ECMO. Importantly, this module will be active only when you click 'YES' in the field '1.18 ECLS?' of the SPRINT-SARI form.**

3.1 DATE OF START OF ECMO: \_\_\_/\_\_\_/\_\_\_ (ONLY DATE FROM 14/12/2019)

3.2 Is this patient enrolled in the EXCEL study?

- Yes  
 No

3.3 If Yes, what is the patients EXCEL study number \_\_\_\_\_

3.4 LOCATION OF ECMO CANNULATION:

- Same Hospital  
 Other Hospital, then patient was retrieved and transferred

3.5 Type and Manufacturer of centrifugal blood pump driven circuit: \_\_\_\_\_ (TEXT)

3.6 Type and Manufacturer of low-resistance oxygenator: \_\_\_\_\_ (TEXT)

3.7 TYPE OF ECMO:

- Venous-venous  
 Venous-arterial

3.8 DRAINAGE CANNULA INSERTION SITE:

- Left femoral vein  
 Left internal jugular vein  
 Right femoral vein  
 Right internal jugular vein

3.9 RETURN CANNULA INSERTION SITE:

- Left femoral vein  
 Left internal jugular vein  
 Right femoral vein  
 Right internal jugular vein  
 Left femoral artery  
 Right femoral artery

3.10 CARDIAC ARREST BEFORE START OF ECMO

- Yes  
 No

3.11 USE OF PRONE POSITION BEFORE START OF ECMO:

- Yes  
 No

3.12 USE OF NEUROMUSCULAR BLOCKADE BEFORE START OF ECMO:

- Yes  
 No

3.13 USE OF RECRUITMENT MANOEUVRES BEFORE START OF ECMO:

- Yes  
 No

**3.14 USE OF INHALED NITRIC OXIDE BEFORE START OF ECMO:**

- Yes  
 No

**3.15 USE OF BICARBONATE BEFORE START OF ECMO**

- Yes  
 No

**3.16 VENTILATORY MODE BEFORE START OF ECMO:**

- Synchronized Intermittent Mandatory Ventilation – Volume-Controlled (SIMV-V)  
 Synchronized Intermittent Mandatory Ventilation – Pressure-Controlled (SIMV-P)  
 Volume Controlled Ventilation  
 Pressure Controlled Ventilation  
 Pressure Regulated Volume Control (PRVC)  
 Airway Pressure Release Ventilation (APRV)  
 Pressure Support Ventilation (PSV)  
 Volume Support Ventilation (VSV)  
 High Frequency Oscillatory (HFO)  
 Bylevel Positive Airway Pressure (BiPAP)  
 Continuous Positive Airway Pressure (CPAP)  
 Proportional Assist Ventilation (PAV)  
 Neurally Adjusted Ventilatory Assist (NAVA)  
 Other: \_\_\_\_\_ (TEXT)

**MECHANICAL VENTILATION & BLOOD GAS ANALYSIS (Qs 3.17- 3.28) – Please document the ‘worst’ value in the 6 hours before the commencement of ECMO. ‘Worst’ means the values associated with the arterial blood gas with the lowest PaO<sub>2</sub>/FiO<sub>2</sub> ratio. Please report ventilatory settings associated with the worst arterial blood gas.**

**3.17 INSPIRATORY FRACTION OF OXYGEN IN THE 6 HOURS BEFORE START OF ECMO: \_\_\_\_\_**  
(ONLY NUMBERS, BETWEEN 21 and 100)

Please document the values associated with the ‘worst’ blood gas analysis in the 6 hours prior to commencement of ECMO. ‘Worst’ is defined as the blood gas with the lowest PaO<sub>2</sub>/FiO<sub>2</sub> ratio.

- Not available

**3.18 RESPIRATORY RATE IN THE 6 HOURS BEFORE START OF ECMO (breaths/min): \_\_\_\_\_**  
(ONLY NUMBERS, BETWEEN 2 and 60)

Please document the values associated with the ‘worst’ blood gas analysis in the 6 hours prior to commencement of ECMO. ‘Worst’ is defined as the blood gas with the lowest PaO<sub>2</sub>/FiO<sub>2</sub> ratio.

- Not available

**3.19 TIDAL VOLUME (ml/Kg of Ideal Body Weight): \_\_\_\_\_** (ONLY NUMBERS, BETWEEN 1 and 14)

Please document the values associated with the ‘worst’ blood gas analysis in the 6 hours prior to commencement of ECMO. ‘Worst’ is defined as the blood gas with the lowest PaO<sub>2</sub>/FiO<sub>2</sub> ratio.

Ideal Body Weight formula:

Male patients:  $50 + (0.91 \times [\text{height in cm} - 152.4])$

Female patients:  $45.5 + (0.91 \times [\text{height in cm} - 152.4])$

Not available

**3.20 POSITIVE END EXPIRATORY PRESSURE IN THE 6 HOURS BEFORE START OF ECMO (cmH2O):** \_\_\_\_\_ (ONLY NUMBERS, BETWEEN 0 and 25)

Please document the values associated with the 'worst' blood gas analysis in the 6 hours prior to commencement of ECMO. 'Worst' is defined as the blood gas with the lowest PaO<sub>2</sub>/FiO<sub>2</sub> ratio.

Not available

**3.21 PEAK AIRWAY PRESSURE IN THE 6 HOURS BEFORE START OF ECMO (cmH2O):** \_\_\_\_\_ (ONLY NUMBERS, BETWEEN 0 and 85)

Please document the values associated with the 'worst' blood gas analysis in the 6 hours prior to commencement of ECMO. 'Worst' is defined as the blood gas with the lowest PaO<sub>2</sub>/FiO<sub>2</sub> ratio.

Not available

**3.22 AIRWAY PLATEAU PRESSURE IN THE 6 HOURS BEFORE START OF ECMO (cmH2O):** \_\_\_\_\_ (ONLY NUMBERS, BETWEEN 0 and 50)

Please document the values associated with the 'worst' blood gas analysis in the 6 hours prior to commencement of ECMO. 'Worst' is defined as the blood gas with the lowest PaO<sub>2</sub>/FiO<sub>2</sub> ratio.

Not available

**3.23 ARTERIAL pH IN THE 6 HOURS BEFORE START OF ECMO:** \_\_\_\_\_ (ONLY NUMBERS FROM 6.500 TO 7.600)

Please document the values associated with the 'worst' blood gas analysis in the 6 hours prior to commencement of ECMO. 'Worst' is defined as the blood gas with the lowest PaO<sub>2</sub>/FiO<sub>2</sub> ratio.

Not available

**3.24 ARTERIAL PARTIAL PRESSURE OF OXYGEN IN THE 6 HOURS BEFORE START OF ECMO (mmHg):** \_\_\_\_\_ (ONLY NUMBERS FROM 20 TO 500)

Please document the values associated with the 'worst' blood gas analysis in the 6 hours prior to commencement of ECMO. 'Worst' is defined as the blood gas with the lowest PaO<sub>2</sub>/FiO<sub>2</sub> ratio.

Not available

**3.25 ARTERIAL PARTIAL PRESSURE OF CARBON DIOXIDE IN THE 6 HOURS BEFORE START OF ECMO (mmHg):** \_\_\_\_\_ (ONLY NUMBERS FROM 10 TO 150)

Please document the values associated with the 'worst' blood gas analysis in the 6 hours prior to commencement of ECMO. 'Worst' is defined as the blood gas with the lowest PaO<sub>2</sub>/FiO<sub>2</sub> ratio.

Not available

**3.26 ARTERIAL HCO<sub>3</sub><sup>-</sup> IN THE 6 HOURS BEFORE START OF ECMO** \_\_\_\_\_ mEq/L

Please document the values associated with the 'worst' blood gas analysis in the 6 hours prior to commencement of ECMO. 'Worst' is defined as the blood gas with the lowest PaO<sub>2</sub>/FiO<sub>2</sub> ratio.

Not available

**3.27 ARTERIAL Base excess IN THE 6 HOURS BEFORE START OF ECMO** \_\_\_\_\_ mmol/L

Please document the values associated with the 'worst' blood gas analysis in the 6 hours prior to commencement of ECMO. 'Worst' is defined as the blood gas with the lowest PaO<sub>2</sub>/FiO<sub>2</sub> ratio.

Not available

**3.28 Lactate IN THE 6 HOURS BEFORE START OF ECMO** \_\_\_\_\_ mmol/L

Please document the values associated with the 'worst' blood gas analysis in the 6 hours prior to commencement of ECMO. 'Worst' is defined as the blood gas with the lowest PaO<sub>2</sub>/FiO<sub>2</sub> ratio.

Not available

**3.29 USE OF CONTINUOUS RENAL REPLACEMENT THERAPY BEFORE START OF ECMO:**

- Yes  
 No

**3.30 USE OF VASOACTIVE DRUGS BEFORE START OF ECMO:**

- Yes  
 No

**3.31 USE OF CARDIAC ASSIST DEVICE BEFORE START OF ECMO:**

- Yes  
 No

**3.32 USE OF ANTIBIOTICS BEFORE START OF ECMO:**

- Yes  
 No

**3.33 ANTIBIOTICS BEFORE START OF ECMO:**

- Yes  
 No

- |                                                    |                                                       |                                               |
|----------------------------------------------------|-------------------------------------------------------|-----------------------------------------------|
| <input type="checkbox"/> Amikacin                  | <input type="checkbox"/> Capreomycin                  | <input type="checkbox"/> Cefmetazole          |
| <input type="checkbox"/> Amoxicillin               | <input type="checkbox"/> Carbenicillin indanyl sodium | <input type="checkbox"/> Cefonicid            |
| <input type="checkbox"/> Amoxicillin + Clavulanate | <input type="checkbox"/> Cefaclor                     | <input type="checkbox"/> Cefoperazone         |
| <input type="checkbox"/> Ampicillin                | <input type="checkbox"/> Cefadroxil                   | <input type="checkbox"/> Cefotaxime           |
| <input type="checkbox"/> Ampicillin + Sulbactam    | <input type="checkbox"/> Cefamandole                  | <input type="checkbox"/> Cefotetan            |
| <input type="checkbox"/> Atovaquone                | <input type="checkbox"/> Cefazolin                    | <input type="checkbox"/> Cefoxitin            |
| <input type="checkbox"/> Azithromycin              | <input type="checkbox"/> Cefdinir                     | <input type="checkbox"/> Cefpodoxime Proxetil |
| <input type="checkbox"/> Aztreonam                 | <input type="checkbox"/> Cefditoren                   | <input type="checkbox"/> Cefprozil            |
| <input type="checkbox"/> Bacampicillin             | <input type="checkbox"/> Cefepime                     | <input type="checkbox"/> Ceftaroline          |
| <input type="checkbox"/> Bacitracin                | <input type="checkbox"/> Cefixime                     | <input type="checkbox"/> Ceftazidime          |
|                                                    |                                                       | <input type="checkbox"/> Ceftibuten           |

- |                          |                       |                          |                                                        |
|--------------------------|-----------------------|--------------------------|--------------------------------------------------------|
| <input type="checkbox"/> | Ceftizoxime           | <input type="checkbox"/> | Neomycin                                               |
| <input type="checkbox"/> | Ceftobiprole          | <input type="checkbox"/> | Netilmicin                                             |
| <input type="checkbox"/> | Ceftriaxone           | <input type="checkbox"/> | Nitrofurantoin                                         |
| <input type="checkbox"/> | Cefuroxime            | <input type="checkbox"/> | Nitrofurazone                                          |
| <input type="checkbox"/> | Cephalexin            | <input type="checkbox"/> | Norfloxacin                                            |
| <input type="checkbox"/> | Cephalothin           | <input type="checkbox"/> | Novobiocin                                             |
| <input type="checkbox"/> | Cephapirin            | <input type="checkbox"/> | Ofloxacin                                              |
| <input type="checkbox"/> | Cephradine            | <input type="checkbox"/> | Oxacillin                                              |
| <input type="checkbox"/> | Chloramphenicol       | <input type="checkbox"/> | Oxytetracycline                                        |
| <input type="checkbox"/> | Cinoxacin             | <input type="checkbox"/> | Penicillin                                             |
| <input type="checkbox"/> | Ciprofloxacin         | <input type="checkbox"/> | Piperacillin                                           |
| <input type="checkbox"/> | Clarithromycin        | <input type="checkbox"/> | Piperacillin + Tazobactam                              |
| <input type="checkbox"/> | Clindamycin           | <input type="checkbox"/> | Podofilox                                              |
| <input type="checkbox"/> | Cloxacillin           | <input type="checkbox"/> | Polymyxin B                                            |
| <input type="checkbox"/> | Colistimethate        | <input type="checkbox"/> | Quinupristin + Dalfopristin                            |
| <input type="checkbox"/> | Cycloserine           | <input type="checkbox"/> | Retapamulin                                            |
| <input type="checkbox"/> | Daptomycin            | <input type="checkbox"/> | Rifapentine                                            |
| <input type="checkbox"/> | Demeclocycline        | <input type="checkbox"/> | Rifaximin                                              |
| <input type="checkbox"/> | Dicloxacillin         | <input type="checkbox"/> | Saturated Solution of Potassium Iodide (SSKI)          |
| <input type="checkbox"/> | Dirithromycin         | <input type="checkbox"/> | Sparfloxacin                                           |
| <input type="checkbox"/> | Doripenem             | <input type="checkbox"/> | Spectinomycin                                          |
| <input type="checkbox"/> | Doxycycline           | <input type="checkbox"/> | Streptomycin                                           |
| <input type="checkbox"/> | Enoxacin              | <input type="checkbox"/> | Sulfadiazine                                           |
| <input type="checkbox"/> | Ertapenem             | <input type="checkbox"/> | Sulfamethoxazole                                       |
| <input type="checkbox"/> | Erythromycin          | <input type="checkbox"/> | Sulfisoxazole                                          |
| <input type="checkbox"/> | Fosfomycin            | <input type="checkbox"/> | Sulphur, precipitated in petrolatum                    |
| <input type="checkbox"/> | Gatifloxacin          | <input type="checkbox"/> | TCA (trichloroacetic acid), BCA (bichloroacetic acid). |
| <input type="checkbox"/> | Gemifloxacin          | <input type="checkbox"/> | Teicoplanin                                            |
| <input type="checkbox"/> | Gentamicin            | <input type="checkbox"/> | Telavancin                                             |
| <input type="checkbox"/> | Grepafloxacin         | <input type="checkbox"/> | Telithromycin                                          |
| <input type="checkbox"/> | Imipenem/Cilastatin   | <input type="checkbox"/> | Terbinafine                                            |
| <input type="checkbox"/> | Imiquimod             | <input type="checkbox"/> | Tetracycline                                           |
| <input type="checkbox"/> | Kanamycin             | <input type="checkbox"/> | Ticarcillin                                            |
| <input type="checkbox"/> | Levofloxacin          | <input type="checkbox"/> | Ticarcillin + Clavulanic Acid                          |
| <input type="checkbox"/> | Lincomycin            | <input type="checkbox"/> | Tigecycline                                            |
| <input type="checkbox"/> | Linezolid             | <input type="checkbox"/> | Tobramycin                                             |
| <input type="checkbox"/> | Lomefloxacin          | <input type="checkbox"/> | Trimethoprim                                           |
| <input type="checkbox"/> | Loracarbef            | <input type="checkbox"/> | Trimethoprim + Sulfamethoxazole                        |
| <input type="checkbox"/> | Mafenide              | <input type="checkbox"/> | Trovafloxacin                                          |
| <input type="checkbox"/> | Meropenem             | <input type="checkbox"/> | Vancomycin                                             |
| <input type="checkbox"/> | Methenamine hippurate |                          |                                                        |
| <input type="checkbox"/> | Methicillin           |                          |                                                        |
| <input type="checkbox"/> | Metronidazole         |                          |                                                        |
| <input type="checkbox"/> | Mezlocillin           |                          |                                                        |
| <input type="checkbox"/> | Minocycline           |                          |                                                        |
| <input type="checkbox"/> | Moxifloxacin          |                          |                                                        |
| <input type="checkbox"/> | Mupirocin             |                          |                                                        |
| <input type="checkbox"/> | Nafcillin             |                          |                                                        |
| <input type="checkbox"/> | Nalidixic Acid        |                          |                                                        |



#### 4. DAILY CASE RECORD FORM

Complete one form 24 hours after commencement of mechanical ventilation, and daily up to discontinuation of mechanical ventilation or death, whichever occurs first **Importantly, parameters related to mechanical ventilation or ECMO will be active only when you click 'YES' in the field '1.17 Invasive ventilation?' or when you click 'YES' in the field '1.18 ECLS?', respectively, of the SPRINT-SARI form.**

4.1 DATE: \_\_\_\_\_ (ONLY DATE, FROM 14/12/2019)

#### 4.2 PATIENT POSITION IN THE LAST 24h:

Please report the position applied predominantly during the 24 hours.

- Supine  
 Prone

4.3 HIGHEST ECMO FLOW RATE IN THE LAST 24h (L/min): \_\_\_\_\_

4.4 HIGHEST ECMO GAS FLOW RATE IN THE LAST 24h (L/min): \_\_\_\_\_

#### 4.5 ECMO CIRCUIT CHANGE IN THE LAST 24h:

- Yes  
 No

#### 4.6 USE OF NEUROMUSCULAR BLOCKADE IN THE LAST 24h:

- Yes  
 No

#### 4.7 USE OF RECRUITMENT MANOEUVRES IN THE LAST 24h:

- Yes  
 No

#### 4.8 USE OF INHALED NITRIC OXIDE IN THE LAST 24h:

- Yes  
 No

#### 4.9 MOST FREQUENT VENTILATORY MODE IN THE LAST 24h:

- Synchronized Intermittent Mandatory Ventilation – Volume-Controlled (SIMV-V)  
 Synchronized Intermittent Mandatory Ventilation – Pressure-Controlled (SIMV-P)  
 Volume Controlled Ventilation  
 Pressure Controlled Ventilation  
 Pressure Regulated Volume Control (PRVC)  
 Airway Pressure Release Ventilation (APRV)  
 Pressure Support Ventilation (PSV)  
 Volume Support Ventilation (VSV)  
 High Frequency Oscillatory (HFO)  
 Bylevel Positive Airway Pressure (BiPAP)  
 Continuous Positive Airway Pressure (CPAP)

- 1  
2  
3  
4  
5  
6  
7
- Proportional Assist Ventilation (PAV)
  - Neurally Adjusted Ventilatory Assist (NAVA)
  - Other: \_\_\_\_\_ (TEXT)

8  
9  
10  
11  
12

**MECHANICAL VENTILATION & BLOOD GAS ANALYSIS (Qs 4.10 – 4.21) – Please document the ‘worst’ value in the last 24 hours. ‘Worst’ means the values associated with the arterial blood gas with the lowest PaO<sub>2</sub>/FiO<sub>2</sub> ratio. Please report ventilatory settings associated with the worst arterial blood gas.**

13  
14  
15

**4.10 INSPIRATORY FRACTION OF OXYGEN IN THE LAST 24h:** \_\_\_\_\_ (ONLY NUMBERS, BETWEEN 21 and 100)

16  
17  
18

Please document the values associated with the ‘worst’ blood gas analysis in the last 24 hours. ‘Worst’ is defined as the blood gas with the lowest PaO<sub>2</sub>/FiO<sub>2</sub> ratio.

19

Not available

20  
21  
22

**4.11 RESPIRATORY RATE IN THE LAST 24h (breaths/min):** \_\_\_\_\_ (ONLY NUMBERS, BETWEEN 2 and 60)

23  
24

Please document the values associated with the ‘worst’ blood gas analysis in the last 24 hours. ‘Worst’ is defined as the blood gas with the lowest PaO<sub>2</sub>/FiO<sub>2</sub> ratio.  Not available

25  
26

**4.12 TIDAL VOLUME IN THE LAST 24h (ml/Kg of Ideal Body Weight):** \_\_\_\_\_ (ONLY NUMBERS, BETWEEN 1 and 14)

27  
28  
29

Please document the values associated with the ‘worst’ blood gas analysis in the last 24 hours. ‘Worst’ is defined as the blood gas with the lowest PaO<sub>2</sub>/FiO<sub>2</sub> ratio. Ideal Body Weight formula:

30

Male patients:  $50 + (0.91 \times [\text{height in cm} - 152.4])$

31  
32

Female patients:  $45.5 + (0.91 \times \{\text{height in cm} - 152.4\})$

33

Not available

34  
35  
36

**4.13 POSITIVE END EXPIRATORY PRESSURE IN THE LAST 24h (cmH<sub>2</sub>O):** \_\_\_\_\_ (ONLY NUMBERS, BETWEEN 0 and 25)

37  
38

Please document the values associated with the ‘worst’ blood gas analysis in the last 24 hours. ‘Worst’ is defined as the blood gas with the lowest PaO<sub>2</sub>/FiO<sub>2</sub> ratio.  Not available

39  
40  
41

**4.14 AIRWAY PLATEAU PRESSURE IN THE LAST 24h (cmH<sub>2</sub>O):** \_\_\_\_\_ (ONLY NUMBERS, BETWEEN 0 and 50)

42  
43  
44

Please document the values associated with the ‘worst’ blood gas analysis in the last 24 hours. ‘Worst’ is defined as the blood gas with the lowest PaO<sub>2</sub>/FiO<sub>2</sub> ratio.  Not available

45  
46

**4.15 ARTERIAL pH IN THE LAST 24h:** \_\_\_\_\_ (ONLY NUMBERS FROM 6.500 TO 7.600)

47  
48  
49

Please document the values associated with the ‘worst’ blood gas analysis in the last 24 hours. ‘Worst’ is defined as the blood gas with the lowest PaO<sub>2</sub>/FiO<sub>2</sub> ratio.  Not available

50  
51

**4.16 ARTERIAL PARTIAL PRESSURE OF OXYGEN IN THE LAST 24h: (mmHg):** \_\_\_\_\_ (ONLY NUMBERS FROM 20 TO 500)

52  
53  
54

Please document the values associated with the ‘worst’ blood gas analysis in the last 24 hours. ‘Worst’ is defined as the blood gas with the lowest PaO<sub>2</sub>/FiO<sub>2</sub> ratio.  Not available

55  
56  
57

**4.17 ARTERIAL PARTIAL PRESSURE OF CARBON DIOXIDE IN THE LAST 24h: (mmHg):** \_\_\_\_\_ (ONLY NUMBERS FROM 10 TO 100)

Please document the values associated with the 'worst' blood gas analysis in the last 24 hours. 'Worst' is defined as the blood gas with the lowest PaO<sub>2</sub>/FiO<sub>2</sub> ratio.  Not available

**4.18 ARTERIAL HCO<sub>3</sub><sup>-</sup> IN THE LAST 24h:** \_\_\_\_\_ mEq/L

Please document the values associated with the 'worst' blood gas analysis in the last 24 hours. 'Worst' is defined as the blood gas with the lowest PaO<sub>2</sub>/FiO<sub>2</sub> ratio.  Not available

**4.19 ARTERIAL Base excess IN THE LAST 24h:** \_\_\_\_\_ mmol/L

Please document the values associated with the 'worst' blood gas analysis in the last 24 hours. 'Worst' is defined as the blood gas with the lowest PaO<sub>2</sub>/FiO<sub>2</sub> ratio.  Not available

**4.20 Lactate IN THE LAST 24h:** \_\_\_\_\_ mmol/L

Please document the values associated with the 'worst' blood gas analysis in the last 24 hours. 'Worst' is defined as the blood gas with the lowest PaO<sub>2</sub>/FiO<sub>2</sub> ratio.

Not available

If this data has already been entered in the 'Daily Case Report Form – Laboratory Results' section of the ISARIC CRF, please DO NOT re-enter the data here. Please leave '4.20 Lactate' blank.

**4.21 CREATININE IN THE LAST 24h (mg/dL):** \_\_\_\_\_

Please document the values associated with the 'worst' blood gas analysis in the last 24 hours. 'Worst' is defined as the blood gas with the lowest PaO<sub>2</sub>/FiO<sub>2</sub> ratio.

Not available

If this data has already been entered in the 'Daily Case Report Form – Laboratory Results' section of the ISARIC CRF, please DO NOT re-enter the data here. Please leave '4.21 Creatinine' blank.

**4.22 USE OF CONTINUOUS RENAL REPLACEMENT THERAPY:**

- Yes  
 No

**4.23 USE OF VASOACTIVE DRUGS IN THE LAST 24h:**

- Yes  
 No

**4.24 TYPE OF VASOACTIVE DRUG 1:**

- Dobutamine   
 Dopamine   
 Enoximone   
 Epinephrine: YES  NO   
 Esmolol   
 Levosimendan   
 Metaraminol   
 Metoprolol   
 Milrinone   
 Nicardipine   
 Nitroglycerin   
 Nitroprusside   
 Norepinephrine: YES  NO   
 Phenylephrine   
 Tolazoline   
 Vasopressin

1  
2  
3  
4 **4.25 HIGHEST DOSE OF VASOACTIVE DRUG 1 IN THE LAST 24h (mcg/Kg/min):** \_\_\_\_\_  
5

6 **4.26 TYPE OF VASOACTIVE DRUG 2:**

- 7  
8  Dobutamine   
9  Dopamine   
10  Enoximone   
11  Epinephrine: YES  NO   
12  Esmolol   
13  Levosimendan   
14  Metaraminol   
15  Metoprolol   
16  Milrinone   
17  Nicardipine   
18  Nitroglycerin   
19  Nitroprusside   
20  Norepinephrine: YES  NO   
21  Phenylephrine   
22  Tolazoline   
23  Vasopressin   
24  
25

26  
27 **4.27 HIGHEST DOSE OF VASOACTIVE DRUG 2 IN THE LAST 24h (mcg/Kg/min):** \_\_\_\_\_  
28

29  
30  
31 **4.28 TYPE OF VASOACTIVE DRUG 3:**

- 32  Dobutamine   
33  Dopamine   
34  Enoximone   
35  Epinephrine: YES  NO   
36  Esmolol   
37  Levosimendan   
38  Metaraminol   
39  Metoprolol   
40  Milrinone   
41  Nicardipine   
42  Nitroglycerin   
43  Nitroprusside   
44  Norepinephrine: YES  NO   
45  Phenylephrine   
46  Tolazoline   
47  Vasopressin   
48  
49

50  
51 **4.29 HIGHEST DOSE OF VASOACTIVE DRUG 3 IN THE LAST 24h (mcg/Kg/min):** \_\_\_\_\_  
52

53 **4.30 USE OF CARDIAC ASSIST DEVICES IN THE LAST 24h:**

- 54  Yes  
55  No  
56

57 **4.31 USE OF ANTIBIOTICS IN THE LAST 24h:**  
58

- Yes
- No

ANTIBIOTICS:

- |                                                       |                                                |                                                                                 |
|-------------------------------------------------------|------------------------------------------------|---------------------------------------------------------------------------------|
| <input type="checkbox"/> Amikacin                     | <input type="checkbox"/> Ciprofloxacin         | <input type="checkbox"/> Norfloxacin                                            |
| <input type="checkbox"/> Amoxicillin                  | <input type="checkbox"/> Clarithromycin        | <input type="checkbox"/> Novobiocin                                             |
| <input type="checkbox"/> Amoxicillin + Clavulanate    | <input type="checkbox"/> Clindamycin           | <input type="checkbox"/> Ofloxacin                                              |
| <input type="checkbox"/> Ampicillin                   | <input type="checkbox"/> Cloxacillin           | <input type="checkbox"/> Oxacillin                                              |
| <input type="checkbox"/> Ampicillin + Sulbactam       | <input type="checkbox"/> Colistimethate        | <input type="checkbox"/> Oxytetracycline                                        |
| <input type="checkbox"/> Atovaquone                   | <input type="checkbox"/> Cycloserine           | <input type="checkbox"/> Penicillin                                             |
| <input type="checkbox"/> Azithromycin                 | <input type="checkbox"/> Daptomycin            | <input type="checkbox"/> Piperacillin                                           |
| <input type="checkbox"/> Aztreonam                    | <input type="checkbox"/> Demeclocycline        | <input type="checkbox"/> Piperacillin + Tazobactam                              |
| <input type="checkbox"/> Bacampicillin                | <input type="checkbox"/> Dicloxacillin         | <input type="checkbox"/> Podofilox                                              |
| <input type="checkbox"/> Bacitracin                   | <input type="checkbox"/> Dirithromycin         | <input type="checkbox"/> Polymyxin B                                            |
| <input type="checkbox"/> Capreomycin                  | <input type="checkbox"/> Doripenem             | <input type="checkbox"/> Quinupristin + Dalfopristin                            |
| <input type="checkbox"/> Carbenicillin sodium indanyl | <input type="checkbox"/> Doxycycline           | <input type="checkbox"/> Retapamulin                                            |
| <input type="checkbox"/> Cefaclor                     | <input type="checkbox"/> Enoxacin              | <input type="checkbox"/> Rifapentine                                            |
| <input type="checkbox"/> Cefadroxil                   | <input type="checkbox"/> Ertapenem             | <input type="checkbox"/> Rifaximin                                              |
| <input type="checkbox"/> Cefamandole                  | <input type="checkbox"/> Erythromycin          | <input type="checkbox"/> Saturated Solution of Potassium Iodide (SSKI)          |
| <input type="checkbox"/> Cefazolin                    | <input type="checkbox"/> Fosfomicin            | <input type="checkbox"/> Sparfloxacin                                           |
| <input type="checkbox"/> Cefdinir                     | <input type="checkbox"/> Gatifloxacin          | <input type="checkbox"/> Spectinomycin                                          |
| <input type="checkbox"/> Cefditoren                   | <input type="checkbox"/> Gemifloxacin          | <input type="checkbox"/> Streptomycin                                           |
| <input type="checkbox"/> Cefditoren                   | <input type="checkbox"/> Gentamicin            | <input type="checkbox"/> Sulfadiazine                                           |
| <input type="checkbox"/> Cefepime                     | <input type="checkbox"/> Grepafloxacin         | <input type="checkbox"/> Sulfamethoxazole                                       |
| <input type="checkbox"/> Cefixime                     | <input type="checkbox"/> Imipenem/Cilastatin   | <input type="checkbox"/> Sulfisoxazole                                          |
| <input type="checkbox"/> Cefmetazole                  | <input type="checkbox"/> Imiquimod             | <input type="checkbox"/> Sulphur, precipitated in petrolatum                    |
| <input type="checkbox"/> Cefonicid                    | <input type="checkbox"/> Kanamycin             | <input type="checkbox"/> TCA (trichloroacetic acid), BCA (bichloroacetic acid). |
| <input type="checkbox"/> Cefoperazone                 | <input type="checkbox"/> Levofloxacin          | <input type="checkbox"/> Teicoplanin                                            |
| <input type="checkbox"/> Cefotaxime                   | <input type="checkbox"/> Lincomycin            | <input type="checkbox"/> Telavancin                                             |
| <input type="checkbox"/> Cefotetan                    | <input type="checkbox"/> Linezolid             | <input type="checkbox"/> Telithromycin                                          |
| <input type="checkbox"/> Cefoxitin                    | <input type="checkbox"/> Lomefloxacin          | <input type="checkbox"/> Terbinafine                                            |
| <input type="checkbox"/> Cefpodoxime Proxetil         | <input type="checkbox"/> Loracarbef            | <input type="checkbox"/> Tetracycline                                           |
| <input type="checkbox"/> Cefprozil                    | <input type="checkbox"/> Mafenide              | <input type="checkbox"/> Ticarcillin                                            |
| <input type="checkbox"/> Ceftaroline                  | <input type="checkbox"/> Meropenem             | <input type="checkbox"/> Ticarcillin + Clavulanic Acid                          |
| <input type="checkbox"/> Ceftazidime                  | <input type="checkbox"/> Methenamine hippurate | <input type="checkbox"/> Tigecycline                                            |
| <input type="checkbox"/> Ceftibuten                   | <input type="checkbox"/> Methicillin           | <input type="checkbox"/> Tobramycin                                             |
| <input type="checkbox"/> Ceftizoxime                  | <input type="checkbox"/> Metronidazole         | <input type="checkbox"/> Trimethoprim                                           |
| <input type="checkbox"/> Ceftobiprole                 | <input type="checkbox"/> Mezlocillin           | <input type="checkbox"/> Trimethoprim + Sulfamethoxazole                        |
| <input type="checkbox"/> Ceftriaxone                  | <input type="checkbox"/> Minocycline           | <input type="checkbox"/> Trovafloxacin                                          |
| <input type="checkbox"/> Cefuroxime                   | <input type="checkbox"/> Moxifloxacin          | <input type="checkbox"/> Vancomycin                                             |
| <input type="checkbox"/> Cephalixin                   | <input type="checkbox"/> Mupirocin             |                                                                                 |
| <input type="checkbox"/> Cephalothin                  | <input type="checkbox"/> Nafeillin             |                                                                                 |
| <input type="checkbox"/> Cephapirin                   | <input type="checkbox"/> Nalidixic Acid        |                                                                                 |
| <input type="checkbox"/> Cephadrine                   | <input type="checkbox"/> Neomycin              |                                                                                 |
| <input type="checkbox"/> Chloramphenicol              | <input type="checkbox"/> Netilmicin            |                                                                                 |
| <input type="checkbox"/> Cinoxacin                    | <input type="checkbox"/> Nitrofurantoin        |                                                                                 |
|                                                       | <input type="checkbox"/> Nitrofurazone         |                                                                                 |

1  
2  
3  
4  
5 **4.32 Haemoglobin IN THE LAST 24h** g/dL \_\_\_\_\_

6  Not available

7  
8 If this data has already been entered in the 'Daily Case Report Form – Laboratory Results' section of the  
9 ISARIC CRF, please DO NOT re-enter the data here. Please leave '4.32 Haemoglobin' blank.

10  
11 **4.33 White Blood Cells IN THE LAST 24h**

12  Not available

13  
14 If this data has already been entered in the 'Daily Case Report Form – Laboratory Results' section of the  
15 ISARIC CRF, please DO NOT re-enter the data here. Please leave '4.33 White Blood Cells' blank.

16 **4.34 White Blood Cells Unit**

- 17  X 10<sup>9</sup>/L  
18  X 10<sup>3</sup>/microL

19  
20 **4.35 AST/SGOT IN THE LAST 24h** U/L \_\_\_\_\_

21  Not available

22  
23 If this data has already been entered in the 'Daily Case Report Form – Laboratory Results' section of the  
24 ISARIC CRF, please DO NOT re-enter the data here. Please leave '4.34 AST' blank.

25  
26 **4.36 ALT/SGPT IN THE LAST 24h** U/L \_\_\_\_\_

27  Not available

28  
29 If this data has already been entered in the 'Daily Case Report Form – Laboratory Results' section of the  
30 ISARIC CRF, please DO NOT re-enter the data here. Please leave '4.36 ALT' blank.

31 **4.37 ANTICOAGULANTS IN THE LAST 24h**

- 32  Yes  
33  No

34  
35  
36 **4.38 TYPE OF ANTICOAGULANTS IN THE LAST 24h**

- 37  Continuous infusion of unfractionated heparin  
38  Subcutaneous unfractionated heparin only  
39  Low molecular heparin  
40  Danaparoid Lepirudin  
41  Argatroban  
42  Hirulog and bivalirudin  
43  Desirudin  
44  Nafamostat Mesilate  
45  Other

46  
47  
48 **4.39 TRANSFUSED PACKED RED BLOOD CELL CONCENTRATE IN THE LAST 24 HOURS**

- 49  Yes  
50  No

51  
52  
53 **4.40 TRANSFUSED PLATELETS CONCENTRATE IN THE LAST 24 HOURS**

- 54  Yes  
55  No

#### 4.41 TRANSFUSED FRESH FROZEN PLASMA IN THE LAST 24 HOURS

- Yes  
 No

#### 4.42 TRANSFUSED CRYOPRECIPITATES IN THE LAST 24 HOURS

- Yes  
 No

#### 4.43 INFECTION COMPLICATION 1:

- Yes  
 No

#### 4.44 SOURCE OF INFECTIOUS COMPLICATION 1

- |                                               |                                                  |                                      |
|-----------------------------------------------|--------------------------------------------------|--------------------------------------|
| <input type="checkbox"/> Lungs                | <input type="checkbox"/> Central nervous system  | <input type="checkbox"/> Cardiac     |
| <input type="checkbox"/> Gastro-intestinal    | <input type="checkbox"/> Osteoarticular and bone | <input type="checkbox"/> Bloodstream |
| <input type="checkbox"/> Genito-urinary       |                                                  | <input type="checkbox"/> Not known   |
| <input type="checkbox"/> Skin and soft tissue |                                                  |                                      |

#### 4.45 CAUSATIVE PATHOGEN 1:

- |                                                            |                                                                     |                                                                          |
|------------------------------------------------------------|---------------------------------------------------------------------|--------------------------------------------------------------------------|
| <input type="checkbox"/> Acinetobacter baumannii           | <input type="checkbox"/> Clostridium tetani (Tetanus)               | <input type="checkbox"/> Lymphogranuloma venereum (LGV)                  |
| <input type="checkbox"/> Actinomyces                       | <input type="checkbox"/> Corynebacterium diphtheriae                | <input type="checkbox"/> Methicillin Resistant Staphylococcus aureus     |
| <input type="checkbox"/> Aeromonas                         | <input type="checkbox"/> Coxiella burnetii                          | <input type="checkbox"/> Moraxella catarrhalis                           |
| <input type="checkbox"/> Bacillus anthracis                | <input type="checkbox"/> Ehrlichia species                          | <input type="checkbox"/> Morganella                                      |
| <input type="checkbox"/> Bacillus species                  | <input type="checkbox"/> Eikenella corrodens                        | <input type="checkbox"/> Mycobacterium abscessus                         |
| <input type="checkbox"/> Bacteroides fragilis              | <input type="checkbox"/> Enterobacter species                       | <input type="checkbox"/> Mycobacterium avium-complex (MAC, MAI, non-HIV) |
| <input type="checkbox"/> Bacteroides species               | <input type="checkbox"/> Enterococcus                               | <input type="checkbox"/> Mycobacterium chelonae                          |
| <input type="checkbox"/> Bartonella species                | <input type="checkbox"/> Erysipelothrix rhusiopathiae               | <input type="checkbox"/> Mycobacterium fortuitum                         |
| <input type="checkbox"/> Bordetella species                | <input type="checkbox"/> Escherichia coli                           | <input type="checkbox"/> Mycobacterium gordonae                          |
| <input type="checkbox"/> Borrelia burgdorferi              | <input type="checkbox"/> Francisella tularensis                     | <input type="checkbox"/> Mycobacterium kansasii                          |
| <input type="checkbox"/> Borrelia species                  | <input type="checkbox"/> Haemophilus ducreyi (Chancroid)            | <input type="checkbox"/> Mycobacterium leprae                            |
| <input type="checkbox"/> Brucella Species                  | <input type="checkbox"/> Haemophilus influenzae                     | <input type="checkbox"/> Mycobacterium marinum                           |
| <input type="checkbox"/> Burkholderia cepacia              | <input type="checkbox"/> Helicobacter cinaedi and related species   | <input type="checkbox"/> Mycobacterium scrofulaceum                      |
| <input type="checkbox"/> Burkholderia mallei               | <input type="checkbox"/> Helicobacter pylori                        | <input type="checkbox"/> Mycobacterium tuberculosis                      |
| <input type="checkbox"/> Burkholderia pseudomallei         | <input type="checkbox"/> Klebsiella granulomatis (Antibiotic Guide) | <input type="checkbox"/> Mycobacterium ulcerans                          |
| <input type="checkbox"/> Campylobacter and related species | <input type="checkbox"/> Klebsiella species                         | <input type="checkbox"/> Mycobacterium xenopi                            |
| <input type="checkbox"/> Campylobacter jejuni              | <input type="checkbox"/> ESBL Klebsiella pneumoniae                 |                                                                          |
| <input type="checkbox"/> Capnocytophaga canimorsus         | <input type="checkbox"/> Lactobacillus                              |                                                                          |
| <input type="checkbox"/> Chlamydia trachomatis             | <input type="checkbox"/> Legionella pneumophila                     |                                                                          |
| <input type="checkbox"/> Chlamydia pneumoniae              | <input type="checkbox"/> Legionella species                         |                                                                          |
| <input type="checkbox"/> Chlamydia psittaci                | <input type="checkbox"/> Leptospira interrogans                     |                                                                          |
| <input type="checkbox"/> Citrobacter species               | <input type="checkbox"/> Listeria monocytogenes                     |                                                                          |
| <input type="checkbox"/> Clostridium botulinum             |                                                                     |                                                                          |
| <input type="checkbox"/> Clostridium difficile             |                                                                     |                                                                          |
| <input type="checkbox"/> Clostridium species               |                                                                     |                                                                          |



- |                                                                   |                                                                     |                                                  |
|-------------------------------------------------------------------|---------------------------------------------------------------------|--------------------------------------------------|
| <input type="checkbox"/> Mycoplasma pneumoniae (Antibiotic Guide) | <input type="checkbox"/> Staphylococcus aureus                      | <input type="checkbox"/> Candida albicans        |
| <input type="checkbox"/> Neisseria gonorrhoeae                    | <input type="checkbox"/> Stenotrophomonas maltophilia               | <input type="checkbox"/> Candida glabrata        |
| <input type="checkbox"/> Neisseria meningitidis                   | <input type="checkbox"/> Streptobacillus moniliformis               | <input type="checkbox"/> Candida guilliermondii  |
| <input type="checkbox"/> Nocardia                                 | <input type="checkbox"/> Streptococcus pneumoniae                   | <input type="checkbox"/> Candida krusei          |
| <input type="checkbox"/> Other atypical mycobacteria              | <input type="checkbox"/> Streptococcus pyogenes (Group A)           | <input type="checkbox"/> Candida lusitanae       |
| <input type="checkbox"/> Pasteurella multocida                    | <input type="checkbox"/> Streptococcus species                      | <input type="checkbox"/> Candida parapsilosis    |
| <input type="checkbox"/> Peptostreptococcus/Peptococcus           | <input type="checkbox"/> Treponema pallidum (syphilis)              | <input type="checkbox"/> Candida species         |
| <input type="checkbox"/> Plesiomonas                              | <input type="checkbox"/> Tropheryma whipplei                        | <input type="checkbox"/> Candida tropicalis      |
| <input type="checkbox"/> Propionibacterium species                | <input type="checkbox"/> Vancomycin Resistant Enterococcus species  | <input type="checkbox"/> Chromomycosis           |
| <input type="checkbox"/> Proteus species                          | <input type="checkbox"/> Vancomycin Resistant Staphylococcus aureus | <input type="checkbox"/> Coccidioides immitis    |
| <input type="checkbox"/> Providencia                              | <input type="checkbox"/> Vibrio cholerae                            | <input type="checkbox"/> Cryptococcus neoformans |
| <input type="checkbox"/> Pseudomonas aeruginosa                   | <input type="checkbox"/> Vibrio species (noncholera)                | <input type="checkbox"/> Cunninghamella          |
| <input type="checkbox"/> Rhodococcus equi                         | <input type="checkbox"/> Yersinia pestis                            | <input type="checkbox"/> Dermatophytes           |
| <input type="checkbox"/> Rickettsia rickettsii                    | <input type="checkbox"/> Yersinia species (non-plague)              | <input type="checkbox"/> Fusarium                |
| <input type="checkbox"/> Rickettsia species                       | <input type="checkbox"/> Absidia                                    | <input type="checkbox"/> Histoplasma capsulatum  |
| <input type="checkbox"/> Salmonella species                       | <input type="checkbox"/> Aspergillus                                | <input type="checkbox"/> Mucor                   |
| <input type="checkbox"/> Serratia species                         | <input type="checkbox"/> Basidiobolomycosis                         | <input type="checkbox"/> Mycetoma                |
| <input type="checkbox"/> Shigella dysenteriae                     | <input type="checkbox"/> Blastomyces dermatitidis                   | <input type="checkbox"/> Pneumocystis carinii    |
| <input type="checkbox"/> Shigella species                         |                                                                     | <input type="checkbox"/> Pneumocystis jirovecii  |
| <input type="checkbox"/> Staphylococci, coagulase negative        |                                                                     | <input type="checkbox"/> Pseudallescheria boydii |
|                                                                   |                                                                     | <input type="checkbox"/> Rhizomucor              |
|                                                                   |                                                                     | <input type="checkbox"/> Rhizopus                |
|                                                                   |                                                                     | <input type="checkbox"/> Saksanea                |
|                                                                   |                                                                     | <input type="checkbox"/> Sporothrix schenckii    |
|                                                                   |                                                                     | <input type="checkbox"/> Zygomycetes             |

**4.46 INFECTION COMPLICATION 2:**

- Yes  
 No

**4.47 SOURCE OF INFECTIOUS COMPLICATION 2:**

- |                                               |                                                  |                                      |
|-----------------------------------------------|--------------------------------------------------|--------------------------------------|
| <input type="checkbox"/> Lungs                | <input type="checkbox"/> Central nervous system  | <input type="checkbox"/> Cardiac     |
| <input type="checkbox"/> Gastro-intestinal    | <input type="checkbox"/> Osteoarticular and bone | <input type="checkbox"/> Bloodstream |
| <input type="checkbox"/> Genito-urinary       |                                                  | <input type="checkbox"/> Not known   |
| <input type="checkbox"/> Skin and soft tissue |                                                  |                                      |

**4.48 CAUSATIVE PATHOGEN 2:**

- |                                                  |                                                            |                                                       |
|--------------------------------------------------|------------------------------------------------------------|-------------------------------------------------------|
| <input type="checkbox"/> Acinetobacter baumannii | <input type="checkbox"/> Burkholderia mallei               | <input type="checkbox"/> Clostridium difficile        |
| <input type="checkbox"/> Actinomyces             | <input type="checkbox"/> Burkholderia pseudomallei         | <input type="checkbox"/> Clostridium species          |
| <input type="checkbox"/> Aeromonas               | <input type="checkbox"/> Campylobacter and related species | <input type="checkbox"/> Clostridium tetani (Tetanus) |
| <input type="checkbox"/> Bacillus anthracis      | <input type="checkbox"/> Campylobacter jejuni              | <input type="checkbox"/> Corynebacterium diphtheriae  |
| <input type="checkbox"/> Bacillus species        | <input type="checkbox"/> Capnocytophaga canimorsus         | <input type="checkbox"/> Coxiella burnetii            |
| <input type="checkbox"/> Bacteroides fragilis    | <input type="checkbox"/> Chlamydia trachomatis             | <input type="checkbox"/> Ehrlichia species            |
| <input type="checkbox"/> Bacteroides species     | <input type="checkbox"/> Chlamydia pneumoniae              | <input type="checkbox"/> Eikenella corrodens          |
| <input type="checkbox"/> Bartonella species      | <input type="checkbox"/> Chlamydia psittaci                | <input type="checkbox"/> Enterobacter species         |
| <input type="checkbox"/> Bordetella species      | <input type="checkbox"/> Citrobacter species               | <input type="checkbox"/> Enterococcus                 |
| <input type="checkbox"/> Borrelia burgdorferi    | <input type="checkbox"/> Clostridium botulinum             | <input type="checkbox"/> Erysipelothrix rhusiopathiae |
| <input type="checkbox"/> Borrelia species        |                                                            | <input type="checkbox"/> Escherichia coli             |
| <input type="checkbox"/> Brucella Species        |                                                            |                                                       |
| <input type="checkbox"/> Burkholderia cepacia    |                                                            |                                                       |

- |                                                                          |                                                                   |                                                                     |
|--------------------------------------------------------------------------|-------------------------------------------------------------------|---------------------------------------------------------------------|
| <input type="checkbox"/> Francisella tularensis                          | <input type="checkbox"/> Mycobacterium ulcerans                   | <input type="checkbox"/> Vancomycin Resistant Enterococcus species  |
| <input type="checkbox"/> Haemophilus ducreyi (Chancroid)                 | <input type="checkbox"/> Mycobacterium xenopi                     | <input type="checkbox"/> Vancomycin Resistant Staphylococcus aureus |
| <input type="checkbox"/> Haemophilus influenzae                          | <input type="checkbox"/> Mycoplasma pneumoniae (Antibiotic Guide) | <input type="checkbox"/> Vibrio cholerae                            |
| <input type="checkbox"/> Helicobacter cinaedi and related species        | <input type="checkbox"/> Neisseria gonorrhoeae                    | <input type="checkbox"/> Vibrio species (noncholera)                |
| <input type="checkbox"/> Helicobacter pylori                             | <input type="checkbox"/> Neisseria meningitidis                   | <input type="checkbox"/> Yersinia pestis                            |
| <input type="checkbox"/> Klebsiella granulomatis (Antibiotic Guide)      | <input type="checkbox"/> Nocardia                                 | <input type="checkbox"/> Yersinia species (non-plague)              |
| <input type="checkbox"/> Klebsiella species                              | <input type="checkbox"/> Other atypical mycobacteria              | <input type="checkbox"/> Absidia                                    |
| <input type="checkbox"/> ESBL Klebsiella pneumoniae                      | <input type="checkbox"/> Pasteurella multocida                    | <input type="checkbox"/> Aspergillus                                |
| <input type="checkbox"/> Lactobacillus                                   | <input type="checkbox"/> Peptostreptococcus/Peptococcus           | <input type="checkbox"/> Basidiobolomyces                           |
| <input type="checkbox"/> Legionella pneumophila                          | <input type="checkbox"/> Plesiomonas                              | <input type="checkbox"/> Blastomyces dermatitidis                   |
| <input type="checkbox"/> Legionella species                              | <input type="checkbox"/> Propionibacterium species                | <input type="checkbox"/> Candida albicans                           |
| <input type="checkbox"/> Leptospira interrogans                          | <input type="checkbox"/> Proteus species                          | <input type="checkbox"/> Candida glabrata                           |
| <input type="checkbox"/> Listeria monocytogenes                          | <input type="checkbox"/> Providencia                              | <input type="checkbox"/> Candida guilliermondii                     |
| <input type="checkbox"/> Lymphogranuloma venereum (LGV)                  | <input type="checkbox"/> Pseudomonas aeruginosa                   | <input type="checkbox"/> Candida krusei                             |
| <input type="checkbox"/> Methicillin Resistant Staphylococcus aureus     | <input type="checkbox"/> Rhodococcus equi                         | <input type="checkbox"/> Candida lusitanae                          |
| <input type="checkbox"/> Moraxella catarrhalis                           | <input type="checkbox"/> Rickettsia rickettsii                    | <input type="checkbox"/> Candida parapsilosis                       |
| <input type="checkbox"/> Morganella                                      | <input type="checkbox"/> Rickettsia species                       | <input type="checkbox"/> Candida species                            |
| <input type="checkbox"/> Mycobacterium abscessus                         | <input type="checkbox"/> Salmonella species                       | <input type="checkbox"/> Candida tropicalis                         |
| <input type="checkbox"/> Mycobacterium avium-complex (MAC, MAI, non-HIV) | <input type="checkbox"/> Serratia species                         | <input type="checkbox"/> Chromomycosis                              |
| <input type="checkbox"/> Mycobacterium chelonae                          | <input type="checkbox"/> Shigella dysenteriae                     | <input type="checkbox"/> Coccidioides immitis                       |
| <input type="checkbox"/> Mycobacterium fortuitum                         | <input type="checkbox"/> Shigella species                         | <input type="checkbox"/> Cryptococcus neoformans                    |
| <input type="checkbox"/> Mycobacterium gordonae                          | <input type="checkbox"/> Staphylococci, coagulase negative        | <input type="checkbox"/> Cunninghamella                             |
| <input type="checkbox"/> Mycobacterium kansasii                          | <input type="checkbox"/> Staphylococcus aureus                    | <input type="checkbox"/> Dermatophytes                              |
| <input type="checkbox"/> Mycobacterium leprae                            | <input type="checkbox"/> Stenotrophomonas maltophilia             | <input type="checkbox"/> Fusarium                                   |
| <input type="checkbox"/> Mycobacterium marinum                           | <input type="checkbox"/> Streptobacillus moniliformis             | <input type="checkbox"/> Histoplasma capsulatum                     |
| <input type="checkbox"/> Mycobacterium scrofulaceum                      | <input type="checkbox"/> Streptococcus pneumoniae                 | <input type="checkbox"/> Mucor                                      |
| <input type="checkbox"/> Mycobacterium tuberculosis                      | <input type="checkbox"/> Streptococcus pyogenes (Group A)         | <input type="checkbox"/> Mycetoma                                   |
|                                                                          | <input type="checkbox"/> Streptococcus species                    | <input type="checkbox"/> Pneumocystis carinii                       |
|                                                                          | <input type="checkbox"/> Treponema pallidum (syphilis)            | <input type="checkbox"/> Pneumocystis jirovecii                     |
|                                                                          | <input type="checkbox"/> Tropheryma whipplei                      | <input type="checkbox"/> Pseudallescheria boydii                    |
|                                                                          |                                                                   | <input type="checkbox"/> Rhizomucor                                 |
|                                                                          |                                                                   | <input type="checkbox"/> Rhizopus                                   |
|                                                                          |                                                                   | <input type="checkbox"/> Saksanea                                   |
|                                                                          |                                                                   | <input type="checkbox"/> Sporothrix schenckii                       |
|                                                                          |                                                                   | <input type="checkbox"/> Zygomycetes                                |

**4.49 INFECTION COMPLICATION 3:**

- Yes
- No

**4.50 SOURCE OF INFECTIOUS COMPLICATION 3:**

- |                                               |                                                  |                                      |
|-----------------------------------------------|--------------------------------------------------|--------------------------------------|
| <input type="checkbox"/> Lungs                | <input type="checkbox"/> Central nervous system  | <input type="checkbox"/> Cardiac     |
| <input type="checkbox"/> Gastro-intestinal    | <input type="checkbox"/> Osteoarticular and bone | <input type="checkbox"/> Bloodstream |
| <input type="checkbox"/> Genito-urinary       |                                                  | <input type="checkbox"/> Not known   |
| <input type="checkbox"/> Skin and soft tissue |                                                  |                                      |

**4.51 CAUSATIVE PATHOGEN 3:**

- |                                                                     |                                                                          |                                                                     |
|---------------------------------------------------------------------|--------------------------------------------------------------------------|---------------------------------------------------------------------|
| <input type="checkbox"/> Acinetobacter baumannii                    | <input type="checkbox"/> Legionella species                              | <input type="checkbox"/> Stenotrophomonas maltophilia               |
| <input type="checkbox"/> Actinomyces                                | <input type="checkbox"/> Leptospira interrogans                          | <input type="checkbox"/> Streptobacillus moniliformis               |
| <input type="checkbox"/> Aeromonas                                  | <input type="checkbox"/> Listeria monocytogenes                          | <input type="checkbox"/> Streptococcus pneumoniae                   |
| <input type="checkbox"/> Bacillus anthracis                         | <input type="checkbox"/> Lymphogranuloma venereum (LGV)                  | <input type="checkbox"/> Streptococcus pyogenes                     |
| <input type="checkbox"/> Bacillus species                           | <input type="checkbox"/> Methicillin Resistant Staphylococcus aureus     | <input type="checkbox"/> Streptococcus species                      |
| <input type="checkbox"/> Bacteroides fragilis                       | <input type="checkbox"/> Moraxella catarrhalis                           | <input type="checkbox"/> Treponema pallidum (syphilis)              |
| <input type="checkbox"/> Bacteroides species                        | <input type="checkbox"/> Morganella                                      | <input type="checkbox"/> Tropheryma whipplei                        |
| <input type="checkbox"/> Bartonella species                         | <input type="checkbox"/> Mycobacterium abscessus                         | <input type="checkbox"/> Vancomycin Resistant Enterococcus species  |
| <input type="checkbox"/> Bordetella species                         | <input type="checkbox"/> Mycobacterium avium-complex (MAC, MAI, non-HIV) | <input type="checkbox"/> Vancomycin Resistant Staphylococcus aureus |
| <input type="checkbox"/> Borrelia burgdorferi                       | <input type="checkbox"/> Mycobacterium chelonae                          | <input type="checkbox"/> Vibrio cholerae                            |
| <input type="checkbox"/> Borrelia species                           | <input type="checkbox"/> Mycobacterium fortuitum                         | <input type="checkbox"/> Vibrio species (noncholera)                |
| <input type="checkbox"/> Brucella Species                           | <input type="checkbox"/> Mycobacterium gordonae                          | <input type="checkbox"/> Yersinia pestis                            |
| <input type="checkbox"/> Burkholderia cepacia                       | <input type="checkbox"/> Mycobacterium kansasii                          | <input type="checkbox"/> Yersinia species (non-plague)              |
| <input type="checkbox"/> Burkholderia mallei                        | <input type="checkbox"/> Mycobacterium leprae                            | <input type="checkbox"/> Absidia                                    |
| <input type="checkbox"/> Burkholderia pseudomallei                  | <input type="checkbox"/> Mycobacterium marinum                           | <input type="checkbox"/> Aspergillus                                |
| <input type="checkbox"/> Campylobacter and related species          | <input type="checkbox"/> Mycobacterium scrofulaceum                      | <input type="checkbox"/> Basidiobolomyces                           |
| <input type="checkbox"/> Campylobacter jejuni                       | <input type="checkbox"/> Mycobacterium tuberculosis                      | <input type="checkbox"/> Blastomyces dermatitidis                   |
| <input type="checkbox"/> Capnocytophaga canimorsus                  | <input type="checkbox"/> Mycobacterium ulcerans                          | <input type="checkbox"/> Candida albicans                           |
| <input type="checkbox"/> Chlamydia trachomatis                      | <input type="checkbox"/> Mycobacterium xenopi                            | <input type="checkbox"/> Candida glabrata                           |
| <input type="checkbox"/> Chlamydomyces pneumoniae                   | <input type="checkbox"/> Mycoplasma pneumoniae (Antibiotic Guide)        | <input type="checkbox"/> Candida guilliermondii                     |
| <input type="checkbox"/> Chlamydomyces psittaci                     | <input type="checkbox"/> Neisseria gonorrhoeae                           | <input type="checkbox"/> Candida krusei                             |
| <input type="checkbox"/> Citrobacter species                        | <input type="checkbox"/> Neisseria meningitidis                          | <input type="checkbox"/> Candida lusitanae                          |
| <input type="checkbox"/> Clostridium botulinum                      | <input type="checkbox"/> Nocardia                                        | <input type="checkbox"/> Candida parapsilosis                       |
| <input type="checkbox"/> Clostridium difficile                      | <input type="checkbox"/> Other atypical mycobacteria                     | <input type="checkbox"/> Candida species                            |
| <input type="checkbox"/> Clostridium species                        | <input type="checkbox"/> Pasteurella multocida                           | <input type="checkbox"/> Candida tropicalis                         |
| <input type="checkbox"/> Clostridium tetani (Tetanus)               | <input type="checkbox"/> Peptostreptococcus/Peptococcus                  | <input type="checkbox"/> Chromomycosis                              |
| <input type="checkbox"/> Corynebacterium diphtheriae                | <input type="checkbox"/> Plesiomonas                                     | <input type="checkbox"/> Coccidioides immitis                       |
| <input type="checkbox"/> Coxiella burnetii                          | <input type="checkbox"/> Propionibacterium species                       | <input type="checkbox"/> Cryptococcus neoformans                    |
| <input type="checkbox"/> Ehrlichia species                          | <input type="checkbox"/> Proteus species                                 | <input type="checkbox"/> Cunninghamella                             |
| <input type="checkbox"/> Eikenella corrodens                        | <input type="checkbox"/> Providencia                                     | <input type="checkbox"/> Dermatophytes                              |
| <input type="checkbox"/> Enterobacter species                       | <input type="checkbox"/> Pseudomonas aeruginosa                          | <input type="checkbox"/> Fusarium                                   |
| <input type="checkbox"/> Enterococcus                               | <input type="checkbox"/> Rhodococcus equi                                | <input type="checkbox"/> Histoplasma capsulatum                     |
| <input type="checkbox"/> Erysipelothrix rhusiopathiae               | <input type="checkbox"/> Rickettsia rickettsii                           | <input type="checkbox"/> Mucor                                      |
| <input type="checkbox"/> Escherichia coli                           | <input type="checkbox"/> Rickettsia species                              | <input type="checkbox"/> Mycetoma                                   |
| <input type="checkbox"/> Francisella tularensis                     | <input type="checkbox"/> Salmonella species                              | <input type="checkbox"/> Pneumocystis carinii                       |
| <input type="checkbox"/> Haemophilus ducreyi (Chancroid)            | <input type="checkbox"/> Serratia species                                | <input type="checkbox"/> Pneumocystis jirovecii                     |
| <input type="checkbox"/> Haemophilus influenzae                     | <input type="checkbox"/> Shigella dysenteriae                            | <input type="checkbox"/> Pseudallescheria boydii                    |
| <input type="checkbox"/> Helicobacter cinaedi and related species   | <input type="checkbox"/> Shigella species                                | <input type="checkbox"/> Rhizomucor                                 |
| <input type="checkbox"/> Helicobacter pylori                        | <input type="checkbox"/> Staphylococci, coagulase negative               | <input type="checkbox"/> Rhizopus                                   |
| <input type="checkbox"/> Klebsiella granulomatis (Antibiotic Guide) | <input type="checkbox"/> Staphylococcus aureus                           | <input type="checkbox"/> Saksanea                                   |
| <input type="checkbox"/> Klebsiella species                         |                                                                          | <input type="checkbox"/> Sporothrix schenckii                       |
| <input type="checkbox"/> ESBL Klebsiella pneumoniae                 |                                                                          | <input type="checkbox"/> Zygomycetes                                |
| <input type="checkbox"/> Lactobacillus                              |                                                                          |                                                                     |
| <input type="checkbox"/> Legionella pneumophila                     |                                                                          |                                                                     |

**4.52 HAEMORRHAGIC COMPLICATION 1:**

- Yes
- No

**4.53 SOURCE OF HAEMORRHAGIC COMPLICATION 1:**

- |                                               |                                                  |                                    |
|-----------------------------------------------|--------------------------------------------------|------------------------------------|
| <input type="checkbox"/> Lungs                | <input type="checkbox"/> Central nervous system  | <input type="checkbox"/> Not known |
| <input type="checkbox"/> Gastro-intestinal    | <input type="checkbox"/> Osteoarticular and bone |                                    |
| <input type="checkbox"/> Genito-urinary       | <input type="checkbox"/> Cardiac                 |                                    |
| <input type="checkbox"/> Skin and soft tissue | <input type="checkbox"/> Bloodstream             |                                    |

**4.54 HAEMORRHAGIC COMPLICATION 2:**

- Yes
- No

**4.55 SOURCE OF HAEMORRHAGIC COMPLICATION 2:**

- |                                            |                                                  |                                      |
|--------------------------------------------|--------------------------------------------------|--------------------------------------|
| <input type="checkbox"/> Lungs             | <input type="checkbox"/> Skin and soft tissue    | <input type="checkbox"/> Cardiac     |
| <input type="checkbox"/> Gastro-intestinal | <input type="checkbox"/> Central nervous system  | <input type="checkbox"/> Bloodstream |
| <input type="checkbox"/> Genito-urinary    | <input type="checkbox"/> Osteoarticular and bone | <input type="checkbox"/> Not known   |

**4.56 OTHER NON-HAEMORRHAGIC COMPLICATION (Please describe):**

\_\_\_\_\_ (TEXT)

**4.57 Ferritin in the last 24 hours:** \_\_\_\_\_ (ng/mL)

Only numbers from 0-1000

- Not available

If this data has already been entered in the 'Daily Case Report Form – Laboratory Results' section of the ISARIC CRF, please DO NOT re-enter the data here. Please leave '4.57 Ferritin' blank.

**4.58 D-dimer in the last 24 hours:**

\_\_\_\_\_ (ng/mL or mcg/mL)

Only numbers from 0-15000

- Not available

If this data has already been entered in the 'Daily Case Report Form – Laboratory Results' section of the ISARIC CRF, please DO NOT re-enter the data here. Please leave '4.58 D-dimer' blank.

**4.59 Troponin in the last 24 hours:**

- Troponin T: \_\_\_\_\_ (ng/mL or ng/L)
- Troponin I: \_\_\_\_\_ (ng/mL or ng/L)

If this data has already been entered in the 'Daily Case Report Form – Laboratory Results' section of the ISARIC CRF, please DO NOT re-enter the data here. Please leave '4.59 Troponin I' blank.

- High sensitivity troponin T: \_\_\_\_\_ (ng/mL or ng/L)
- High sensitivity troponin I: \_\_\_\_\_ (ng/mL or ng/L)
- Not available

**4.60 Cardiac BNP in the last 24 hours:**

\_\_\_\_\_ (picograms/mL)

Only numbers between 0-1000

- Not available

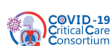



CONFIDENTIAL

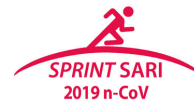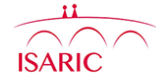

1  
2  
3  
4  
5  
6  
7  
8  
9  
10  
11  
12  
13  
14  
15  
16  
17  
18  
19  
20  
21  
22  
23  
24  
25  
26  
27  
28  
29  
30  
31  
32  
33  
34  
35  
36  
37  
38  
39  
40  
41  
42  
43  
44  
45  
46  
47  
48  
49  
50  
51  
52  
53  
54  
55  
56  
57  
58  
59  
60

For peer review only

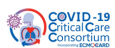

Version 1.2.7  
8 May 2020

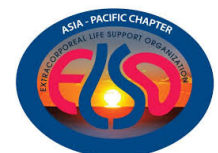

**CORE CASE RECORD FORM (EOT Final)**

**5 OUTCOMES**

**5.1 DATE OF ECMO DISCONTINUATION:** \_\_\_\_ / \_\_\_\_ / \_\_\_\_ (ONLY DATE, FROM 14/12/2019)

**5.2 DATE OF INVASIVE MECHANICAL VENTILATION DISCONTINUATION:** \_\_\_\_ / \_\_\_\_ / \_\_\_\_ (ONLY DATE, FROM 14/12/2019)

**5.3 DATE OF ICU DISCHARGE:** \_\_\_\_ / \_\_\_\_ / \_\_\_\_ (ONLY DATE, FROM 01/01/2019)

**5.4 DATE OF HOSPITAL DISCHARGE:** \_\_\_\_ / \_\_\_\_ / \_\_\_\_ (ONLY DATE, FROM 01/01/2019)

**5.5 DATE OF DEATH:** \_\_\_\_ / \_\_\_\_ / \_\_\_\_ (ONLY DATE, FROM 01/01/2019)

Not applicable

**5.6 SITE OF DEATH**

ICU

HOSPITAL

OUTSIDE HOSPITAL

Not applicable

**5.7 MAIN CAUSE OF ICU DEATH**

Respiratory Failure

Cardiac Failure

Liver Failure

Cardio-vascular accident

Septic shock

Haemorrhagic shock

Other

Not applicable

**5.8 ALIVE AT 28 DAYS POST ICU ADMISSION?**

Yes

No

**5.9 FINAL ASSESSMENT NOTES**

TEXT)

**5.10 At any time post ICU admission and until ICU discharge, did the patient present new cutaneous manifestations?**

Yes

No

Not available

**If yes to 5.10, type of cutaneous manifestations (please select up to three (3) options)**

Bullae

- Macules
- Nodules
- Papules
- Plaques
- Purpura
- Pustules
- Rash
- Scale
- Urticaria
- Vesicles
- Other: \_\_\_\_\_

If yes to 5.10, specify the involved regions (please select up to three (3) options):

- Face
- Truck
- Upper limbs
- Hands
- Lower limbs
- Feet

For peer review only
